# Supplementary material for: Rhodium(iii)-catalyzed synthesis of trisubstituted furans via vinylic C–H bond activation
Source: Royal Society of Chemistry journal article supplement (doi:10.1039/d1ob01293b), 2021-01-01

## Electronic Supplementary Information

### Rhodium(III)-Catalyzed Synthesis of Trisubstituted Furans *via* Vinylic C-H Bond Activation

Mahadev Sharanappa Sherikar, Kiran R. Bettadapur, Veeranjanyulu Lanke, and Kandikere Ramaiah Prabhu\*

Department of Organic Chemistry

Indian Institute of Science,

Bangalore 560 012

Karnataka, India

\*E-mail: prabhu@iisc.ac.in

### Table of Contents

| S. No. | Title                                                                         | Page no. |
|--------|-------------------------------------------------------------------------------|----------|
| 1      | General Experimental                                                          | SI 02    |
| 2      | Typical experimental procedure                                                | SI 02    |
| 3      | Scale-up experimental procedure                                               | SI 02    |
| 4      | Typical experimental procedure for synthetic transformation                   | SI 02    |
| 5      | Typical experimental procedure mechanistic studies<br>(H/D exchange reaction) | SI 03    |
| 6      | Optimization Reactions                                                        | SI 03    |
| 7      | Characterization data for isolated products                                   | SI 08    |
| 8      | Copies of <sup>1</sup> H and <sup>13</sup> C NMR                              | SI 12    |

### **General Experimental**

NMR spectra were recorded on a 400 MHz spectrometer in CDCl<sub>3</sub>, Tetramethylsilane (TMS;  $\delta = 0.00$  ppm) served as an internal standard for <sup>1</sup>H NMR. The corresponding residual non-deuterated solvent signal (CDCl<sub>3</sub>;  $\delta = 77.00$  ppm) was used as internal standard for <sup>13</sup>C NMR. IR spectra were measured using a FT-IR spectrometer. Mass spectra were obtained with a Q-TOF Mass Spectrometer (ESI-HRMS). Flash column chromatography was carried out by packing glass columns with commercial silica gel 100 - 200 mesh (commercial suppliers) and thin-layer chromatography was carried out using silica gel GF-254. All catalysts, reagents and reactants were procured from commercial suppliers. All solvents used for work up and chromatographic procedures were purchased from commercial suppliers and used without any further purification.

### **Typical experimental procedure for the synthesis of furan derivative:**

To a pre-dried 8 mL screw cap vial was added  $\alpha,\beta$ -unsaturated ketone derivatives (0.2 mmol, 1equiv.), [RhCp\*Cl<sub>2</sub>]<sub>2</sub> (9.3 mg, 7.5 mol %), AgSbF<sub>6</sub> (21 mg, 30 mol %), acrylate derivative (0.8 mmol), Piv-OH (20.4 mg, 0.2 mmol), Cu(OAc)<sub>2</sub>·H<sub>2</sub>O (48 mg, 0.24 mmol). To this mixture, DCM (2 mL) was added. The vial was tightly capped and placed in a pre-heated (90 °C) metal block. After 48h, the reaction mixture was cooled to room temperature, diluted with ethyl acetate, and passed through a short silica gel (100-200 mesh size) bed. The organic layer was concentrated under reduced pressure, and the crude product was purified on a silica gel column using ethyl acetate/hexane (0:100 to 5:95) mixture.

### **Experimental procedure for the Scale-up of the synthesis of furan derivative:**

In a 50-mL pressure tube  $\alpha,\beta$ -unsaturated ketone derivatives (4 mmol, 1 equiv.), [RhCp\*Cl<sub>2</sub>]<sub>2</sub> (186 mg, 7.5 mol %), Piv-OH (408 mg, 1 equiv.), Cu(OAc)<sub>2</sub>·H<sub>2</sub>O (960 mg, 1.2 equiv.), methyl acrylate derivative (160mmol, 4 equiv.), AgSbF<sub>6</sub> (420 mg, 30 mol %). To this mixture DCM (40 mL) was added. This tube was sealed with a screw cap and placed in a pre-heated oil bath at 90 °C and the reaction mixture was stirred at the same temperature for 48 h. After completion of the reaction (monitored by TLC) the reaction mixture was cooled to room temperature and filtered through silica gel bed (100-200 mesh) taken in a short column and concentrated under vacuum. The crude products were purified by flash column chromatography using ethyl acetate and petroleum ether (0:100 to 5:95) to afford 60% (0.55 g) yield.

### **Typical experimental procedure for synthetic transformation of furan product 4aa :**

To a pre-dried 8 mL, screw cap vial was added compound **4aa** (0.25 mmol) and aq. solution of NaOH (5%, 1 mL), the reaction mixture was stirred at 90 °C for 5 min followed by stirring

at rt for 24h. After completion of the reaction (monitored by TLC), 1N HCl was added to the reaction mixture, and pH was adjusted up to 2. Extracted with ethyl acetate (10 mL \* 3 times) then combined organic layer passed through sodium sulphate, the solvent was evaporated, and crude mixture subjected to flash column chromatography to obtain pure product **5** as a white solid.

To a solution of **4aa** (0.25 mmol) in Dry THF (2 mL) in a 10 mL round bottom flask, Suspension of LiAlH<sub>4</sub> in dry THF solution was added dropwise at 0 °C, after addition of LiAlH<sub>4</sub>, the reaction mixture was stirred at rt for overnight. The reaction mixture was then quenched by the addition of water and extracted with ethyl acetate (15 mL \* 3 times). The combined organic layer passed through sodium sulphate, the solvent was evaporated, and the crude mixture was subjected to flash column chromatography to obtain pure product **6**.

### Mechanistic studies (H/D exchange reaction):

To a pre-dried 8 mL screw cap vial was added enone derivative (0.2 mmol, 1 equiv.), [RhCp\*Cl<sub>2</sub>]<sub>2</sub> (9.3 mg, 7.5 mol %), Cu(OAc)<sub>2</sub>·H<sub>2</sub>O (48 mg, 0.24 mmol), D<sub>2</sub>O (2.0 mmol, 10 equiv.), AgSbF<sub>6</sub> (21.0 mg, 30 mol %). To this mixture DCM (2 mL) was added. The vial was tightly capped and placed in a pre-heated (90 °C) metal block. After 48h, the reaction mixture was cooled to room temperature, diluted with ethyl acetate, and passed through a short silica gel (100-200 mesh size) bed. The organic layer was concentrated under reduced pressure and the crude product was purified on a silica gel column using ethyl acetate/hexane mixture.

### Optimization:

All reactions were carried out on a 0.2 mmol scale. Yields are based in <sup>1</sup>H NMR using Trimethoxy benzene as an internal standard.

**Table S1: Screening: Catalyst**

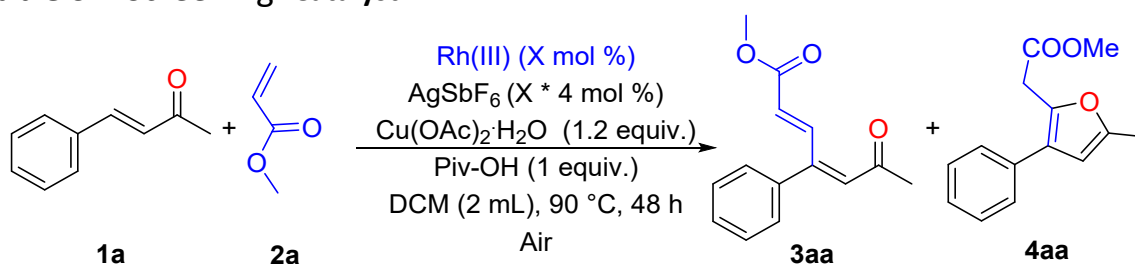

| Entry | Catalyst (mol %)                                           | NMR yields<br>3aa/4aa (%) |
|-------|------------------------------------------------------------|---------------------------|
| 1     | [RhCp*Cl <sub>2</sub> ] <sub>2</sub> (10)                  | 00/58                     |
| 2     | [RhCp*Cl <sub>2</sub> ] <sub>2</sub> (7.5)                 | 00/69                     |
| 3     | [RhCp*Cl <sub>2</sub> ] <sub>2</sub> (05)                  | 00/48                     |
| 4     | [Ru( <i>p</i> -cymene)Cl <sub>2</sub> ] <sub>2</sub> (7.5) | 20/30                     |
| 5     | [IrCp*Cl <sub>2</sub> ] <sub>2</sub> (7.5)                 | nd                        |
| 6     | [Cp*Co(CO)I <sub>2</sub> ] (7.5)                           | nd                        |

**Table S2: Screening: Solvent**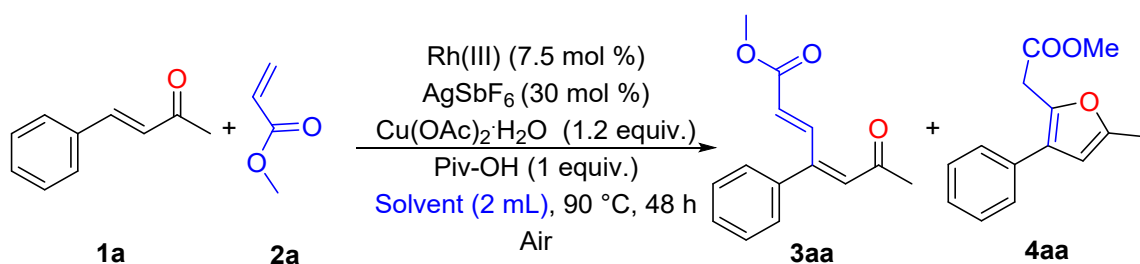

| Entry | Solvent (2 mL)    | NMR yields 3aa/4aa (%) |
|-------|-------------------|------------------------|
| 1     | DCM               | 00/69                  |
| 2     | EtOAc             | nd                     |
| 3     | THF               | nd                     |
| 4     | DCE               | 05/53                  |
| 5     | Toluene           | nd                     |
| 6     | TFE               | nd                     |
| 7     | 1,4-Dioxane       | nd                     |
| 8     | HFIP              | nd                     |
| 9     | MeOH              | nd                     |
| 10    | CHCl <sub>3</sub> | nd                     |
| 11    | DMSO              | nd                     |
| 12    | DMF               | nd                     |

**Table S3: Screening: Temperature**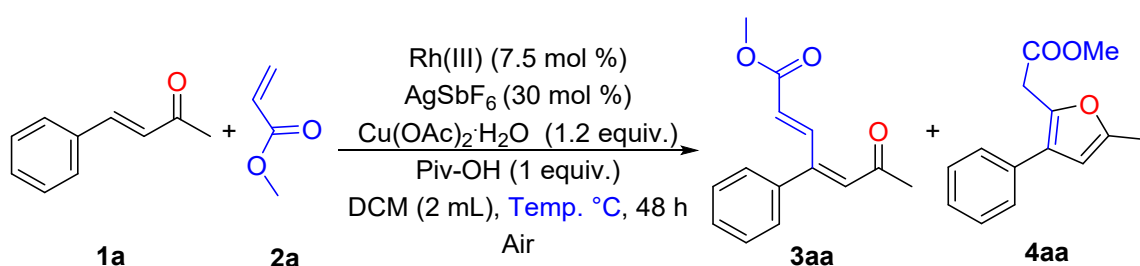

| Entry | Temperature (°C) | NMR yields 3aa/4aa (%) |
|-------|------------------|------------------------|
| 1     | r.t.             | nd                     |
| 2     | 80               | 10/48                  |
| 3     | 90               | 00/69                  |
| 4     | 100              | 00/48                  |

**Table S4: Screening: Additives**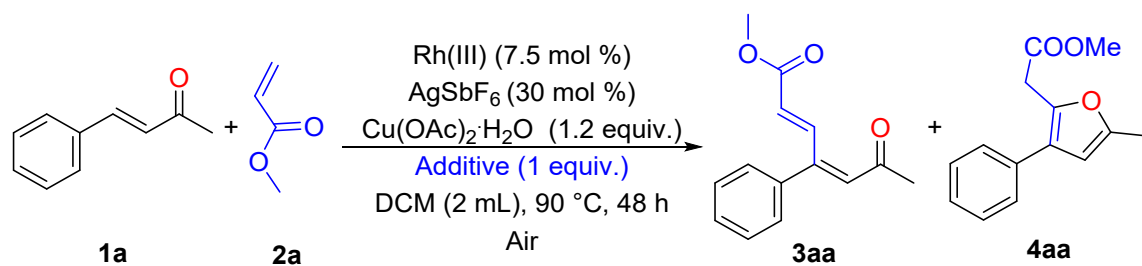

| Entry | Additive (equiv.)                  | NMR yields<br>3aa/4aa (%) |
|-------|------------------------------------|---------------------------|
| 1     | NaOAc (1)                          | nd                        |
| 2     | TFA (1)                            | 00/45                     |
| 3     | AcOH (1)                           | 00/59                     |
| 4     | KOAc (1)                           | nd                        |
| 5     | K <sub>2</sub> CO <sub>3</sub> (1) | nd                        |
| 6     | AdCOOH (1)                         | 00/62                     |
| 7     | Pivalic acid (1)                   | 00/69                     |
| 8     | Pivalic acid (1.5)                 | 00/68                     |
| 9     | Pivalic acid (0.5)                 | 00/56                     |
| 10    | Benzoic acid (1)                   | nd                        |

**Table S5: Screening: Activator**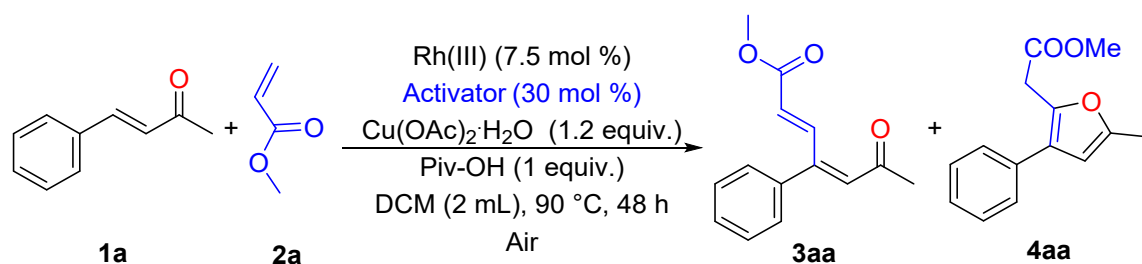

| Entry | Activator (30 mol %)          | NMR yields<br>3aa/4aa (%) |
|-------|-------------------------------|---------------------------|
| 1     | AgBF <sub>4</sub>             | 00/49                     |
| 2     | AgPF <sub>6</sub>             | nd                        |
| 3     | AgSbF <sub>6</sub>            | 00/69                     |
| 4     | AgSbF <sub>6</sub> (20 mol %) | 00/50                     |
| 5     | AgSbF <sub>6</sub> (40 mol %) | 00/65                     |
| 6     | AgNTf <sub>2</sub>            | nd                        |
| 7     | AgOAc                         | nd                        |
| 8     | -                             | nd                        |

**Table S6: Screening: Oxidants**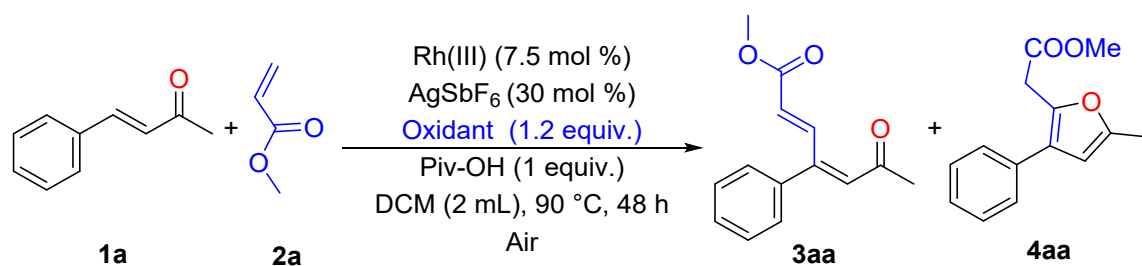

| Entry | Oxidants (equiv.)                            | NMR yields<br>3aa/4aa (%) |
|-------|----------------------------------------------|---------------------------|
| 1     | CuCO <sub>3</sub> (1.2)                      | 05/11                     |
| 2     | CuOTf (1.2)                                  | nd                        |
| 3     | CuO (1.2)                                    | nd                        |
| 4     | Cu(OAc) <sub>2</sub> ·H <sub>2</sub> O (1.2) | 00/69                     |
| 5     | Cu(OAc) <sub>2</sub> ·H <sub>2</sub> O (1.5) | 00/69                     |
| 6     | Cu(OAc) <sub>2</sub> ·H <sub>2</sub> O (1.0) | 00/60                     |
| 7     | Cu(OAc) <sub>2</sub> ·H <sub>2</sub> O (2.0) | 00/68                     |
| 8     | Ag <sub>2</sub> CO <sub>3</sub> (1.2)        | nd                        |
| 9     | AgOAc (1.2)                                  | 00/30                     |
| 10    | AgSbF <sub>6</sub> (1.2)                     | nd                        |
| 11    | Cu(acac) <sub>2</sub> (1.2)                  | nd                        |
| 12    | Zn(OAc) <sub>2</sub> ·2H <sub>2</sub> O      | nd                        |
| 13    | Mn(OAc) <sub>2</sub> ·4H <sub>2</sub> O      | nd                        |

**Mechanistic studies (H/D exchange reaction):**

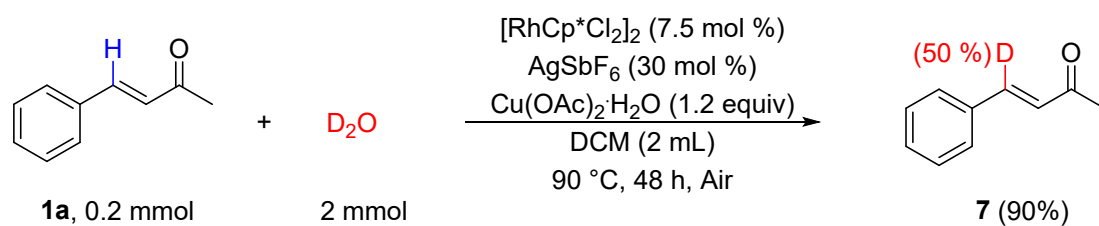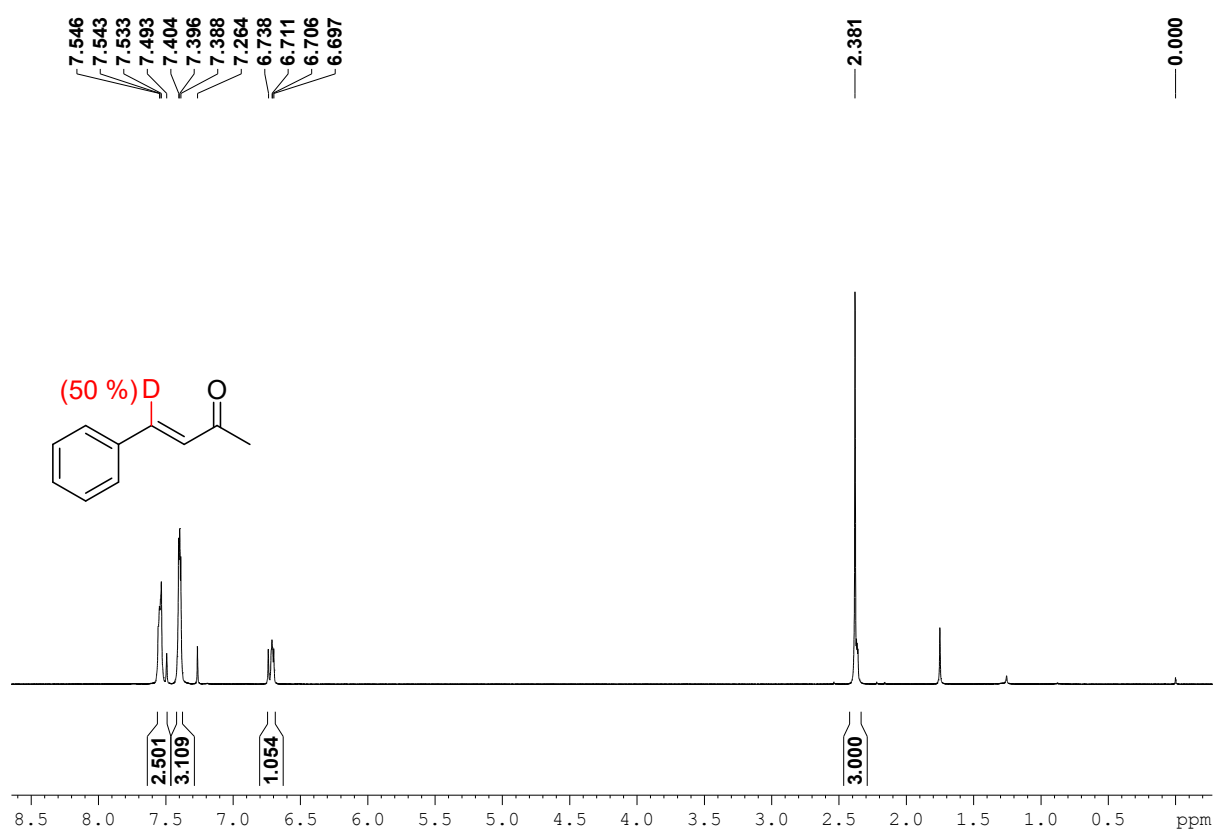

Characterization Data for all Isolated Products

- 1) **Methyl (2E,4E)-6-oxo-4-phenylhepta-2,4-dienoate (3aa).** Yield – 16 mg (35%), yellow liquid;  $R_f$  (10% EtOAc/hexane) 0.25; IR (Neat,  $\text{cm}^{-1}$ ): 1682, 1721.  $^1\text{H NMR}$  (400 MHz,  $\text{CDCl}_3$ )  $\delta$  1.81 (s, 3 H), 3.73 (s, 3 H), 5.70 (d,  $J = 15.55$  Hz, 1 H), 6.40 (s, 1 H), 7.13-7.15 (m, 2 H), 7.41-7.44 (m, 3 H), 7.50 (d,  $J = 15.59$  Hz, 1 H).  $^{13}\text{C} \{^1\text{H}\}$  NMR (100 MHz,  $\text{CDCl}_3$ )  $\delta$  30.5, 51.8, 126.8, 128.5, 128.7, 128.8, 135.31, 135.35, 147.0, 148.7, 166.5, 199.5. HRMS (ESI)  $m/z$ : (M+Na)<sup>+</sup> Calculated for  $\text{C}_{14}\text{H}_{14}\text{O}_3\text{Na}$  253.0841, found 253.0838.

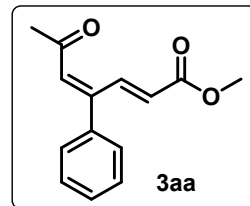

- 2) **Methyl 2-(5-methyl-3-phenylfuran-2-yl)acetate (4aa).** Yield - 29 mg (64%), 550 mg [(4 mmol scale) 60%] yellow liquid;  $R_f$  (5% EtOAc/hexane) 0.4; IR (Neat,  $\text{cm}^{-1}$ ): 1744.  $^1\text{H NMR}$  (400 MHz,  $\text{CDCl}_3$ )  $\delta$  2.32 (s, 3 H), 3.75 (s, 5 H), 6.14 (s, 1 H), 7.26-7.31 (m, 1 H), 7.38 (d,  $J = 4.22$  Hz, 4 H).  $^{13}\text{C} \{^1\text{H}\}$  NMR (100 MHz,  $\text{CDCl}_3$ )  $\delta$  13.5, 33.0, 52.3, 107.5, 124.7, 126.8, 127.6, 128.6, 133.6, 141.3, 151.4, 170.3. HRMS (ESI)  $m/z$ : (M+H)<sup>+</sup> Calculated for  $\text{C}_{14}\text{H}_{14}\text{O}_3$  231.1021, found 231.1019.

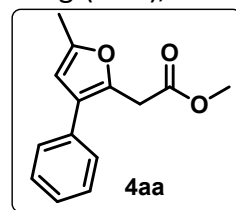

- 3) **Methyl 2-(5-methyl-3-(p-tolyl)furan-2-yl)acetate (4ba).** Yield - 26 mg (53%), brown liquid;  $R_f$  (5% EtOAc/hexane) 0.5; IR (Neat,  $\text{cm}^{-1}$ ): 1743.  $^1\text{H NMR}$  (400 MHz,  $\text{CDCl}_3$ )  $\delta$  2.30 (s, 3 H), 2.35 (s, 3 H), 3.72 (s, 2 H), 3.73 (s, 3 H), 6.11 (s, 1 H), 7.18 (d,  $J = 7.95$  Hz, 2 H), 7.26 (d,  $J = 7.89$  Hz, 2 H).  $^{13}\text{C} \{^1\text{H}\}$  NMR (100 MHz,  $\text{CDCl}_3$ )  $\delta$  13.5, 21.1, 33.0, 52.3, 107.5, 124.6, 127.5, 129.3, 130.7, 136.4, 141.0, 151.2, 170.4. HRMS (ESI)  $m/z$ : (M+H)<sup>+</sup> Calculated for  $\text{C}_{15}\text{H}_{16}\text{O}_3$  245.1178, found 245.1176.

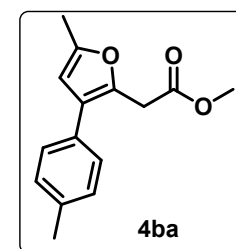

- 4) **Methyl 2-(3-(4-ethylphenyl)-5-methylfuran-2-yl)acetate (4ca).** Yield – 25 mg (49%), yellow liquid;  $R_f$  (5% EtOAc/hexane) 0.35; IR (Neat,  $\text{cm}^{-1}$ ): 1743.  $^1\text{H NMR}$  (400 MHz,  $\text{CDCl}_3$ )  $\delta$  1.25 (t,  $J = 7.60$  Hz, 3 H), 2.31 (s, 3 H), 2.66 (q,  $J = 7.60$  Hz, 2 H), 3.73 (s, 2 H), 3.74 (s, 3 H), 6.12 (s, 1 H), 7.22 (d,  $J = 7.94$  Hz, 2 H), 7.30 (d,  $J = 8.06$  Hz, 2 H).  $^{13}\text{C} \{^1\text{H}\}$  NMR (100 MHz,  $\text{CDCl}_3$ )  $\delta$  13.5, 15.5, 28.5, 33.0, 52.3, 107.5, 124.6, 127.6, 128.1, 130.9, 141.0, 142.8, 151.2, 170.4. HRMS (ESI)  $m/z$ : (M+H)<sup>+</sup> Calculated for  $\text{C}_{16}\text{H}_{18}\text{O}_3$  259.1334, found 259.1336.

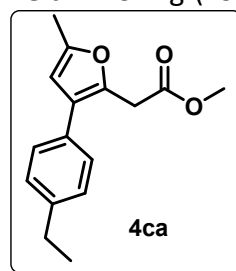

- 5) **Methyl 2-(3-(4-methoxyphenyl)-5-methylfuran-2-yl)acetate (4da).** Yield - 24 mg (46%), yellow liquid;  $R_f$  (5% EtOAc/hexane) 0.35; IR (Neat,  $\text{cm}^{-1}$ ): 1744.  $^1\text{H NMR}$  (400 MHz,  $\text{CDCl}_3$ )  $\delta$  2.30 (s, 3 H), 3.71 (s, 2 H), 3.74 (s, 3 H), 3.82 (s, 3 H), 6.10 (s, 1 H), 6.90-6.94 (m, 2 H), 7.29-7.32 (m, 2 H).  $^{13}\text{C} \{^1\text{H}\}$  NMR (100 MHz,  $\text{CDCl}_3$ )  $\delta$  13.5, 33.0, 52.3, 55.3, 107.5, 114.1, 124.3, 126.1, 128.7, 140.7, 151.2, 158.5, 170.5. HRMS (ESI)  $m/z$ : (M+Na)<sup>+</sup> Calculated for  $\text{C}_{15}\text{H}_{16}\text{O}_4$  283.0946, found 283.0942.

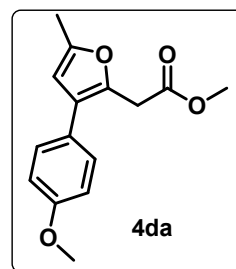



- 6) **Methyl 2-(3-(4-bromophenyl)-5-methylfuran-2-yl)acetate (4ea)**. Yield - 31 mg (50%), pale yellow liquid;  $R_f$  (5% EtOAc/hexane) 0.5; IR (Neat,  $\text{cm}^{-1}$ ): 1744.  $^1\text{H NMR}$  (400 MHz,  $\text{CDCl}_3$ )  $\delta$  2.30 (s, 3 H), 3.70 (s, 2 H), 3.74 (s, 3 H), 6.10 (s, 1 H), 7.23-7.26 (m, 2 H), 7.48-7.51 (m, 2 H).  $^{13}\text{C } \{^1\text{H}\}$  NMR (100 MHz,  $\text{CDCl}_3$ )  $\delta$  13.5, 33.0, 52.4, 107.2, 120.7, 123.7, 129.2, 131.7, 132.5, 141.5, 151.7, 170.1. HRMS (ESI)  $m/z$ : (M+H)<sup>+</sup> Calculated for  $\text{C}_{14}\text{H}_{13}\text{BrO}_3$  309.0126, found 309.0124.

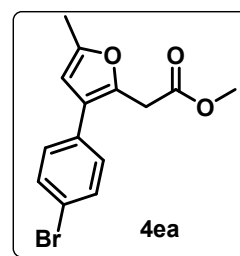

- 7) **Methyl 2-(3-(4-chlorophenyl)-5-methylfuran-2-yl)acetate (4fa)**. Yield - 24 mg (44%), yellow liquid;  $R_f$  (5% EtOAc/hexane) 0.5; IR (Neat,  $\text{cm}^{-1}$ ): 1744.  $^1\text{H NMR}$  (400 MHz,  $\text{CDCl}_3$ )  $\delta$  2.30 (s, 3 H), 3.70 (s, 2 H), 3.74 (s, 3 H), 6.10 (s, 1 H), 7.29-7.32 (m, 2 H), 7.33-7.36 (m, 2 H).  $^{13}\text{C } \{^1\text{H}\}$  NMR (100 MHz,  $\text{CDCl}_3$ )  $\delta$  13.5, 33.0, 52.4, 107.3, 123.7, 128.84, 128.89, 132.1, 132.6, 141.5, 151.6, 170.2. HRMS (ESI)  $m/z$ : (M+H)<sup>+</sup> Calculated for  $\text{C}_{14}\text{H}_{13}\text{ClO}_3$  265.0631, found 265.0613.

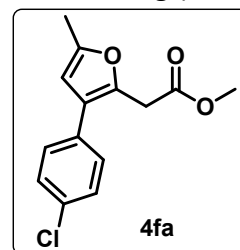

- 8) **Methyl 2-(3-(3,4-dimethoxyphenyl)-5-methylfuran-2-yl)acetate (4ga)**. Yield - 23 mg (40%), yellow liquid;  $R_f$  (5% EtOAc/hexane) 0.3; IR (Neat,  $\text{cm}^{-1}$ ): 1741.  $^1\text{H NMR}$  (400 MHz,  $\text{CDCl}_3$ )  $\delta$  2.30 (s, 3 H), 3.72 (s, 2 H), 3.74 (s, 3 H), 3.893 (s, 3 H), 3.898 (m, 3 H), 6.11 (s, 1 H), 6.88 (d,  $J = 8.27$  Hz, 1 H), 6.92 (dd,  $J = 8.19, 1.81$  Hz, 1 H), 6.96 (d,  $J = 1.72$  Hz, 1 H).  $^{13}\text{C } \{^1\text{H}\}$  NMR (100 MHz,  $\text{CDCl}_3$ )  $\delta$  13.5, 33.1, 52.3, 55.8, 55.9, 107.5, 111.1, 111.4, 119.9, 124.6, 126.4, 140.8, 148.0, 148.9, 151.3, 170.4. HRMS (ESI)  $m/z$ : (M+Na)<sup>+</sup> Calculated for  $\text{C}_{16}\text{H}_{18}\text{O}_5$  Na 313.1052, found 313.1050.

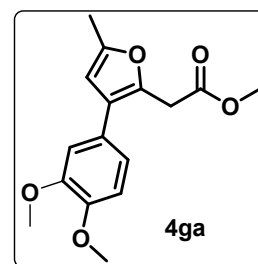

- 9) **Methyl 2-(5-methyl-3-(*m*-tolyl)furan-2-yl)acetate (4ha)**. Yield - 22.5 mg (46%), pale yellow liquid;  $R_f$  (5% EtOAc/hexane) 0.4; IR (Neat,  $\text{cm}^{-1}$ ): 1742.  $^1\text{H NMR}$  (400 MHz,  $\text{CDCl}_3$ )  $\delta$  2.30 (s, 3 H), 2.37 (s, 3 H), 3.73 (s, 2 H), 3.74 (s, 3 H), 6.12 (s, 1 H), 7.09 (d,  $J = 7.47$  Hz, 1 H), 7.17 (d,  $J = 7.66$  Hz, 2 H), 7.26 (t,  $J = 7.28$  Hz, 1 H).  $^{13}\text{C } \{^1\text{H}\}$  NMR (100 MHz,  $\text{CDCl}_3$ )  $\delta$  13.5, 21.4, 33.0, 52.3, 107.5, 124.71, 124.77, 127.5, 128.4, 128.5, 133.5, 138.2, 141.2, 151.3, 170.4. HRMS (ESI)  $m/z$ : (M+H)<sup>+</sup> Calculated for  $\text{C}_{15}\text{H}_{16}\text{O}_3$  245.1178, found 245.1178.

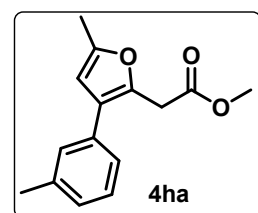

- 10) **Methyl 2-(3-(3-bromophenyl)-5-methylfuran-2-yl)acetate (4ia)**. Yield - 27 mg (43%), yellow liquid;  $R_f$  (5% EtOAc/hexane) 0.4; IR (Neat,  $\text{cm}^{-1}$ ): 1744.  $^1\text{H NMR}$  (400 MHz,  $\text{CDCl}_3$ )  $\delta$  2.30 (s, 3 H), 3.72 (s, 2 H), 3.75 (s, 3 H), 6.11 (d,  $J = 0.58$  Hz, 1 H), 7.24 (t,  $J = 7.89$  Hz, 1 H), 7.31 (dt,  $J = 7.75, 1.40$  Hz, 1 H), 7.40 (dt,  $J = 7.86, 1.81$  Hz, 1 H), 7.53 (t,  $J = 1.78$  Hz, 1 H).  $^{13}\text{C } \{^1\text{H}\}$  NMR (100 MHz,  $\text{CDCl}_3$ )  $\delta$  13.5, 33.0, 52.4, 107.2, 122.7, 123.5, 126.1, 129.7, 130.1, 130.6, 135.7, 141.8, 151.7, 170.1. HRMS (ESI)  $m/z$ : (M+H)<sup>+</sup> Calculated for  $\text{C}_{14}\text{H}_{13}\text{BrO}_3$  309.0126, found 309.0128.

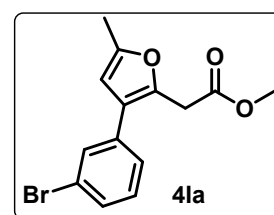

**11) Methyl 2-(5-ethyl-3-phenylfuran-2-yl)acetate (4ja).** Yield – 26 mg (53%), yellow liquid;  $R_f$  (5% EtOAc/hexane) 0.3; IR (Neat,  $\text{cm}^{-1}$ ): 1743.  $^1\text{H}$  NMR (400 MHz,  $\text{CDCl}_3$ )  $\delta$  1.26 (t,  $J = 7.56$  Hz, 3 H), 2.66 (q,  $J = 7.56$  Hz, 2 H), 3.74 (s, 3 H), 3.75 (s, 2 H), 6.15 (s, 1 H), 7.26-7.30 (m, 1 H), 7.38-7.39 (m, 4 H).  $^{13}\text{C}$   $\{^1\text{H}\}$  NMR (100 MHz,  $\text{CDCl}_3$ )  $\delta$  11.9, 21.3, 33.0, 52.3, 105.9, 124.5, 126.7, 127.6, 128.6, 133.7, 141.2, 157.1, 170.4. HRMS (ESI)  $m/z$ : (M+H) $^+$  Calculated for  $\text{C}_{15}\text{H}_{16}\text{O}_3$  245.1178, found 245.1176.

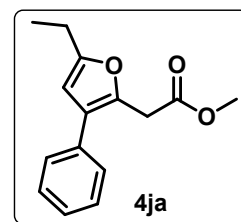

**12) Methyl 2-(5-isobutyl-3-phenylfuran-2-yl)acetate (4ka).** Yield – 36.5 mg (63%), pale yellow liquid;  $R_f$  (5% EtOAc/hexane) 0.45; IR (Neat,  $\text{cm}^{-1}$ ): 1744.  $^1\text{H}$  NMR (400 MHz,  $\text{CDCl}_3$ )  $\delta$  0.97 (d,  $J = 6.73$  Hz, 6 H), 1.99 (septet,  $J = 6.78$  Hz, 1 H), 2.50 (d,  $J = 7.00$  Hz, 2 H), 3.74 (s, 3 H), 3.76 (s, 2 H), 6.16 (s, 1 H), 7.26-7.31 (m, 1 H), 7.36-7.41 (m, 4 H).  $^{13}\text{C}$   $\{^1\text{H}\}$  NMR (100 MHz,  $\text{CDCl}_3$ )  $\delta$  22.3, 27.8, 33.1, 37.1, 52.2, 107.6, 124.4, 126.7, 127.6, 128.6, 133.7, 141.2, 154.9, 170.3. HRMS (ESI)  $m/z$ : (M+H) $^+$  Calculated for  $\text{C}_{17}\text{H}_{21}\text{O}_3$  273.1491, found 273.1495.

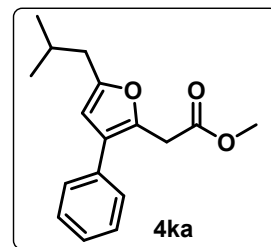

**13) Methyl 2-(5-butyl-3-phenylfuran-2-yl)acetate (4la).** Yield – 34 mg (59%), yellow liquid;  $R_f$  (5% EtOAc/hexane) 0.5; IR (Neat,  $\text{cm}^{-1}$ ): 1743.  $^1\text{H}$  NMR (400 MHz,  $\text{CDCl}_3$ )  $\delta$  0.90-0.93 (m, 3 H), 1.33-1.38 (m, 4 H), 1.63-1.71 (m, 2 H), 2.62 (t,  $J = 7.75$  Hz, 2 H), 3.74 (s, 3 H), 3.75 (s, 2 H), 6.15 (s, 1 H), 7.26-7.31 (m, 1 H), 7.36-7.40 (m, 4 H).  $^{13}\text{C}$   $\{^1\text{H}\}$  NMR (100 MHz,  $\text{CDCl}_3$ )  $\delta$  14.0, 22.4, 27.6, 27.9, 31.4, 33.1, 52.3, 106.5, 124.4, 126.7, 127.6, 128.6, 133.7, 141.1, 155.9, 170.4. HRMS (ESI)  $m/z$ : (M+Na) $^+$  Calculated for  $\text{C}_{18}\text{H}_{20}\text{O}_3\text{Na}$  309.1467, found 309.1464.

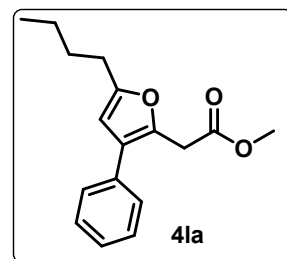

**14) Methyl 2-(4,5-dimethyl-3-phenylfuran-2-yl)acetate (4ma).** Yield – 9 mg (19%), pale yellow liquid;  $R_f$  (5% EtOAc/hexane) 0.3; IR (Neat,  $\text{cm}^{-1}$ ): 1743.  $^1\text{H}$  NMR (400 MHz,  $\text{CDCl}_3$ )  $\delta$  1.89 (s, 3 H), 2.24 (s, 3 H), 3.60 (s, 2 H), 3.71 (s, 3 H), 7.27-7.32 (m, 3 H), 7.39 (t,  $J = 7.50$  Hz, 2 H).  $^{13}\text{C}$   $\{^1\text{H}\}$  NMR (100 MHz,  $\text{CDCl}_3$ )  $\delta$  9.0, 11.5, 32.6, 52.2, 114.3, 125.6, 126.8, 128.4, 129.2, 133.3, 141.1, 146.8, 170.4. HRMS (ESI)  $m/z$ : (M+H) $^+$  Calculated for  $\text{C}_{15}\text{H}_{16}\text{O}_3$  245.1178, found 245.1177.

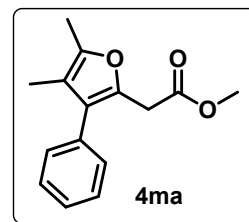

**15) Ethyl 2-(3-phenylfuran-2-yl)acetate (4ab).** Yield – 22 mg (45%), yellow liquid;  $R_f$  (5% EtOAc/hexane) 0.5; IR (Neat,  $\text{cm}^{-1}$ ): 1742.  $^1\text{H}$  NMR (400 MHz,  $\text{CDCl}_3$ )  $\delta$  1.27 (t,  $J = 7.21$  Hz, 3 H), 2.31 (s, 3 H), 3.72 (s, 2 H), 4.20 (q,  $J = 7.07$  Hz, 2 H), 6.14 (s, 1 H), 7.26-7.31 (m, 1 H), 7.35-7.39 (m, 4 H).  $^{13}\text{C}$   $\{^1\text{H}\}$  NMR (100 MHz,  $\text{CDCl}_3$ )  $\delta$  13.5, 14.1, 33.3, 61.2, 107.4, 124.6, 126.7, 127.6, 128.6, 133.7, 141.5, 151.3, 169.9. HRMS (ESI)  $m/z$ : (M+Na) $^+$  Calculated for  $\text{C}_{15}\text{H}_{16}\text{O}_3\text{Na}$  267.0997, found 267.0998.

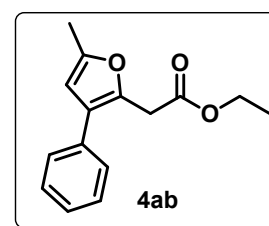

**16) Butyl 2-(3-phenylfuran-2-yl)acetate (4ac).**

Yield - 28 mg (52%), yellow liquid;  $R_f$  (5% EtOAc/hexane) 0.45; IR (Neat,  $\text{cm}^{-1}$ ): 1744.  $^1\text{H NMR}$  (400 MHz,  $\text{CDCl}_3$ )  $\delta$  0.92 (t,  $J = 7.40$  Hz, 3 H), 1.37 (sextet,  $J = 7.55$  Hz, 2 H), 1.62 (quintet,  $J = 6.67$  Hz, 2 H), 2.31 (s, 3 H), 3.72 (s, 2 H), 4.15 (t,  $J = 6.57$  Hz, 2 H), 6.14 (s, 1 H), 7.26-7.30 (m, 1 H), 7.36-7.40 (m, 4 H).

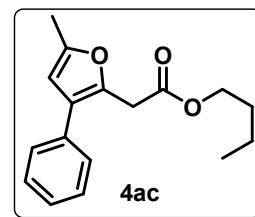

$^{13}\text{C}\{^1\text{H}\}$  NMR (100 MHz,  $\text{CDCl}_3$ )  $\delta$  13.5, 13.6, 19.0, 30.5, 33.3, 65.0, 107.4, 124.5, 126.7, 127.6, 128.6, 133.7, 141.5, 151.2, 170.0. HRMS (ESI)  $m/z$ :  $(\text{M}+\text{Na})^+$  Calculated for  $\text{C}_{17}\text{H}_{20}\text{O}_3$  Na 295.1310, found 295.1310.

**17) Benzyl 2-(3-phenylfuran-2-yl)acetate (4ad).**

Yield - 27 mg (45%), yellow liquid;  $R_f$  (5% EtOAc/hexane) 0.5; IR (Neat,  $\text{cm}^{-1}$ ): 1741.  $^1\text{H NMR}$  (400 MHz,  $\text{CDCl}_3$ )  $\delta$  2.32 (s, 3 H), 3.79 (s, 2 H), 5.20 (s, 2 H), 6.15 (s, 1 H), 7.27-7.29 (m, 1 H), 7.32-7.38 (m, 9 H).

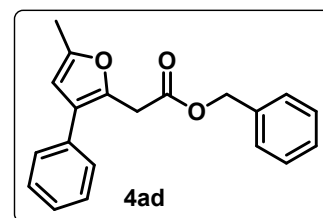

$^{13}\text{C}\{^1\text{H}\}$  NMR (100 MHz,  $\text{CDCl}_3$ )  $\delta$  13.5, 33.2, 66.8, 107.5, 124.8, 126.7, 127.6, 128.1, 128.2, 128.5, 128.6, 133.6, 135.7, 141.2, 151.4, 169.7. HRMS (ESI)  $m/z$ :  $(\text{M}+\text{Na})^+$  Calculated for  $\text{C}_{20}\text{H}_{18}\text{O}_3\text{Na}$  329.1154, found 329.1151.

**18) Naphthalen-1-yl 2-(3-phenylfuran-2-yl)acetate (4ae).**

Yield - 21 mg (30%), yellow liquid;  $R_f$  (5% EtOAc/hexane) 0.3; IR (Neat,  $\text{cm}^{-1}$ ): 1745.

$^1\text{H NMR}$  (400 MHz,  $\text{CDCl}_3$ )  $\delta$  2.39 (d,  $J = 0.57$  Hz, 3 H), 4.10 (s, 2 H), 6.23 (d,  $J = 0.81$  Hz, 1 H), 7.28 (dd,  $J = 7.57$ , 0.88 Hz, 1 H), 7.32 (tt,  $J = 7.25$ , 1.99 Hz, 1 H), 7.41-7.51 (m, 7 H), 7.74 (d,  $J = 8.29$  Hz, 1 H), 7.78-7.80 (m, 1 H), 7.86 (dd,  $J = 7.32$ , 1.59 Hz, 1 H).

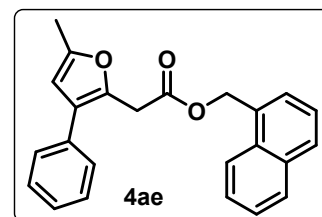

$^{13}\text{C}\{^1\text{H}\}$  NMR (100 MHz,  $\text{CDCl}_3$ )  $\delta$  13.6, 33.5, 107.8, 118.0, 121.1, 125.2, 125.3, 126.1, 126.45, 126.47, 126.6, 127.0, 127.8, 127.9, 128.8, 133.6, 134.6, 140.8, 146.5, 151.7, 168.3. HRMS (ESI)  $m/z$ :  $(\text{M}+\text{Na})^+$  Calculated for  $\text{C}_{23}\text{H}_{18}\text{O}_3\text{Na}$  365.1154, found 365.1152.

**19) 2-(5-methyl-3-phenylfuran-2-yl)acetic acid (5).**

Yield - 53.5 mg (99%), White solid; M.P. 116 °C,  $R_f$  (30% EtOAc/hexane) 0.3; IR (Neat,  $\text{cm}^{-1}$ ): 1712.

$^1\text{H NMR}$  (400 MHz,  $\text{CDCl}_3$ )  $\delta$  2.32 (s, 3 H), 3.78 (s, 2 H), 6.15 (s, 1 H), 7.27-7.30 (m, 1 H), 7.36-7.39 (m, 4 H).  $^{13}\text{C}\{^1\text{H}\}$  NMR (100 MHz,  $\text{CDCl}_3$ )  $\delta$  13.5, 32.9, 107.6, 125.2, 126.7, 126.9, 127.6, 128.7, 133.4, 140.6, 151.6, 176.3. HRMS (ESI)  $m/z$ :  $(\text{M}+\text{K})^+$  Calculated for  $\text{C}_{13}\text{H}_{12}\text{O}_3\text{K}$  255.0424, found 255.0421.

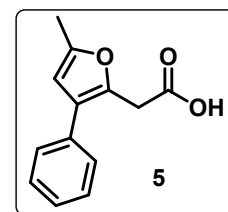**20) 2-(5-methyl-3-phenylfuran-2-yl)ethan-1-ol (6).**

Yield - 40 mg (79%), reddish brown liquid; IR (Neat,  $\text{cm}^{-1}$ ): 3355, 2922.  $^1\text{H NMR}$  (400 MHz,  $\text{CDCl}_3$ )  $\delta$  1.73 (s, 1 H), 2.31 (d,  $J = 0.44$  Hz, 3 H), 3.01 (t,  $J = 6.21$  Hz, 2 H), 3.93 (t,  $J = 6.36$  Hz, 2 H), 6.12 (d,  $J = 0.85$  Hz, 1 H), 7.24-7.28 (m, 1 H), 7.35-7.40 (m, 4 H).  $^{13}\text{C}\{^1\text{H}\}$  NMR (100 MHz,  $\text{CDCl}_3$ )  $\delta$  13.5, 30.3, 61.5, 107.4, 123.5, 126.5, 127.7, 128.5, 134.0, 146.4, 150.7. HRMS (ESI)  $m/z$ :  $(\text{M}+\text{H})^+$  Calculated for  $\text{C}_{13}\text{H}_{15}\text{O}_2$  203.1072, found 203.1071.

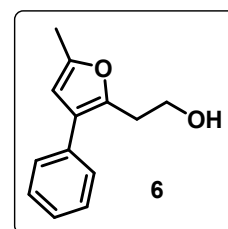

7.390  
7.380  
7.311  
7.302  
7.291  
7.280  
7.269  
7.260

6.147

3.751

2.320

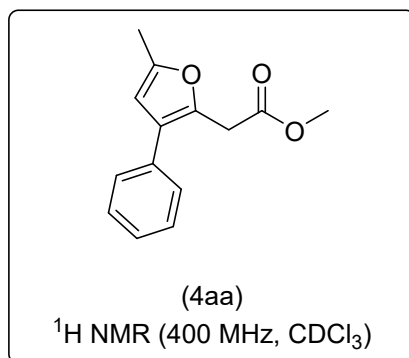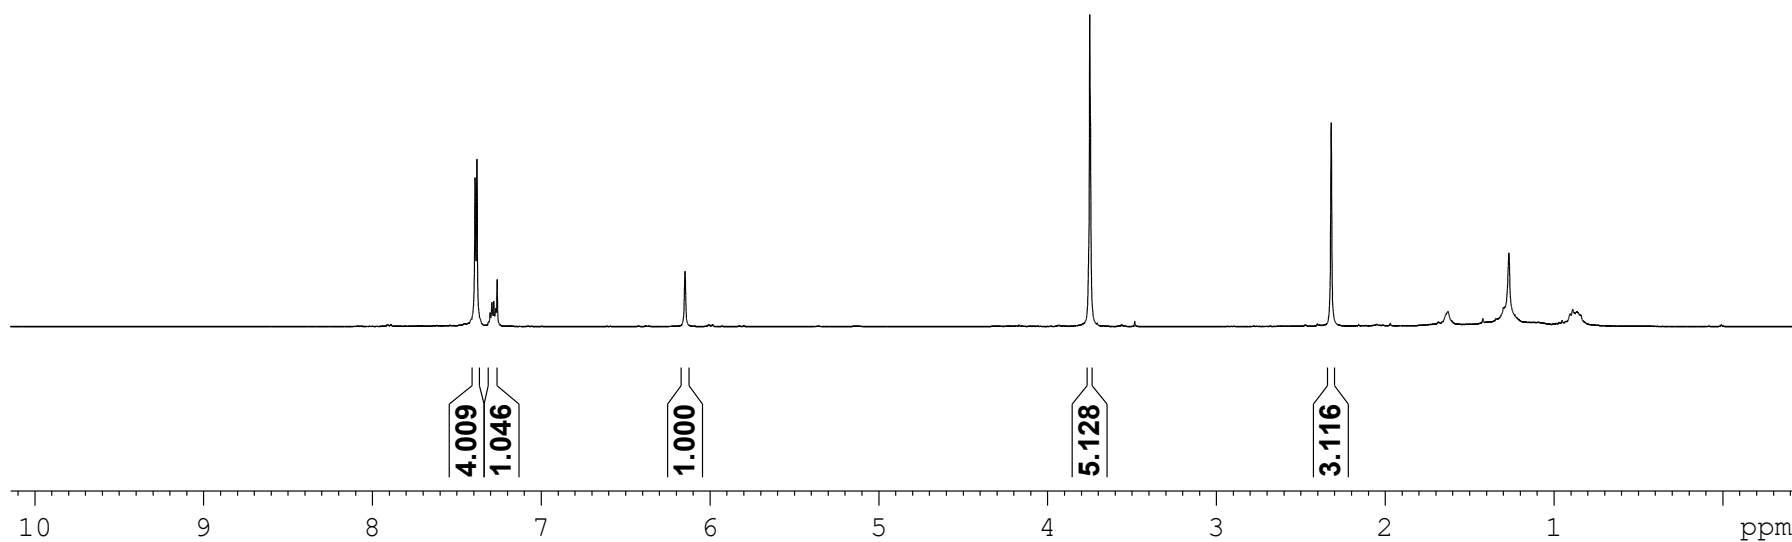

—170.386  
—151.412  
—141.345  
133.657  
128.658  
127.655  
126.801  
124.742  
—107.524

77.356  
77.038  
76.721

—52.321

—33.045

—13.528

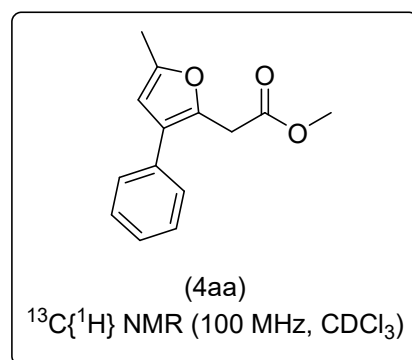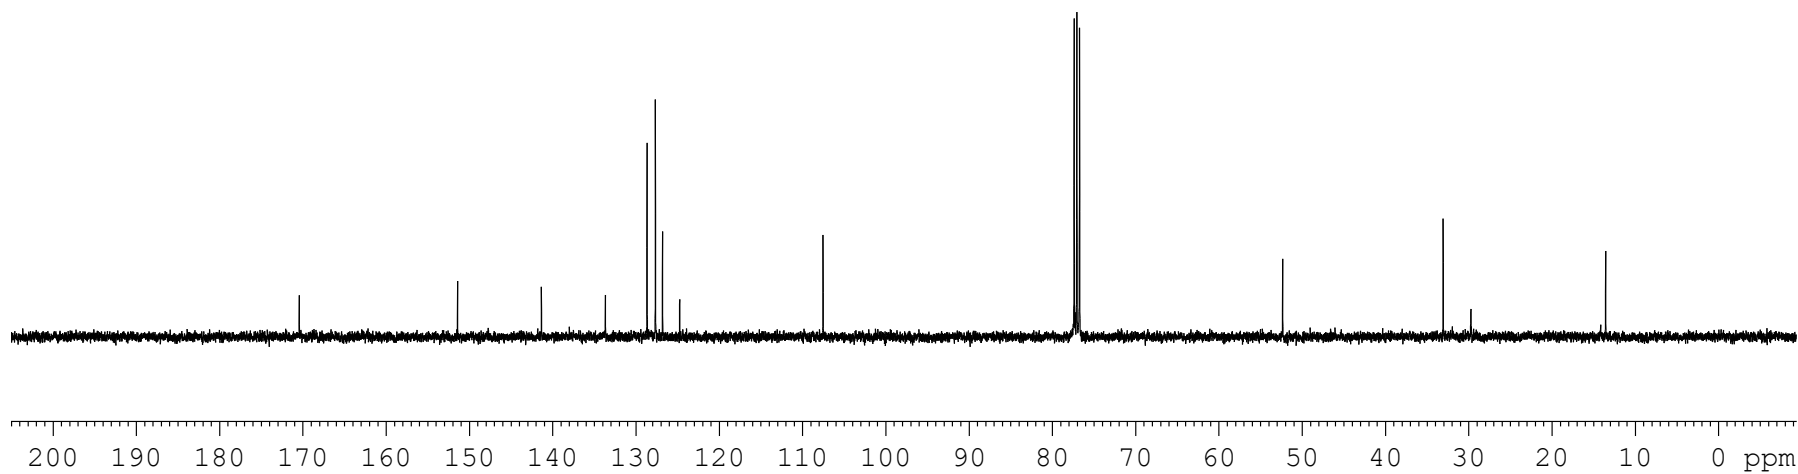

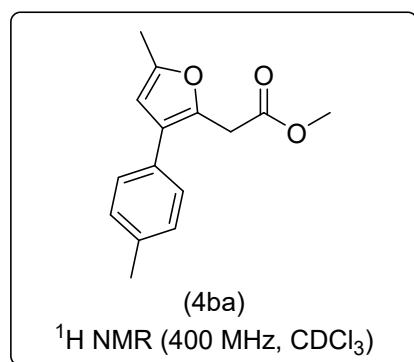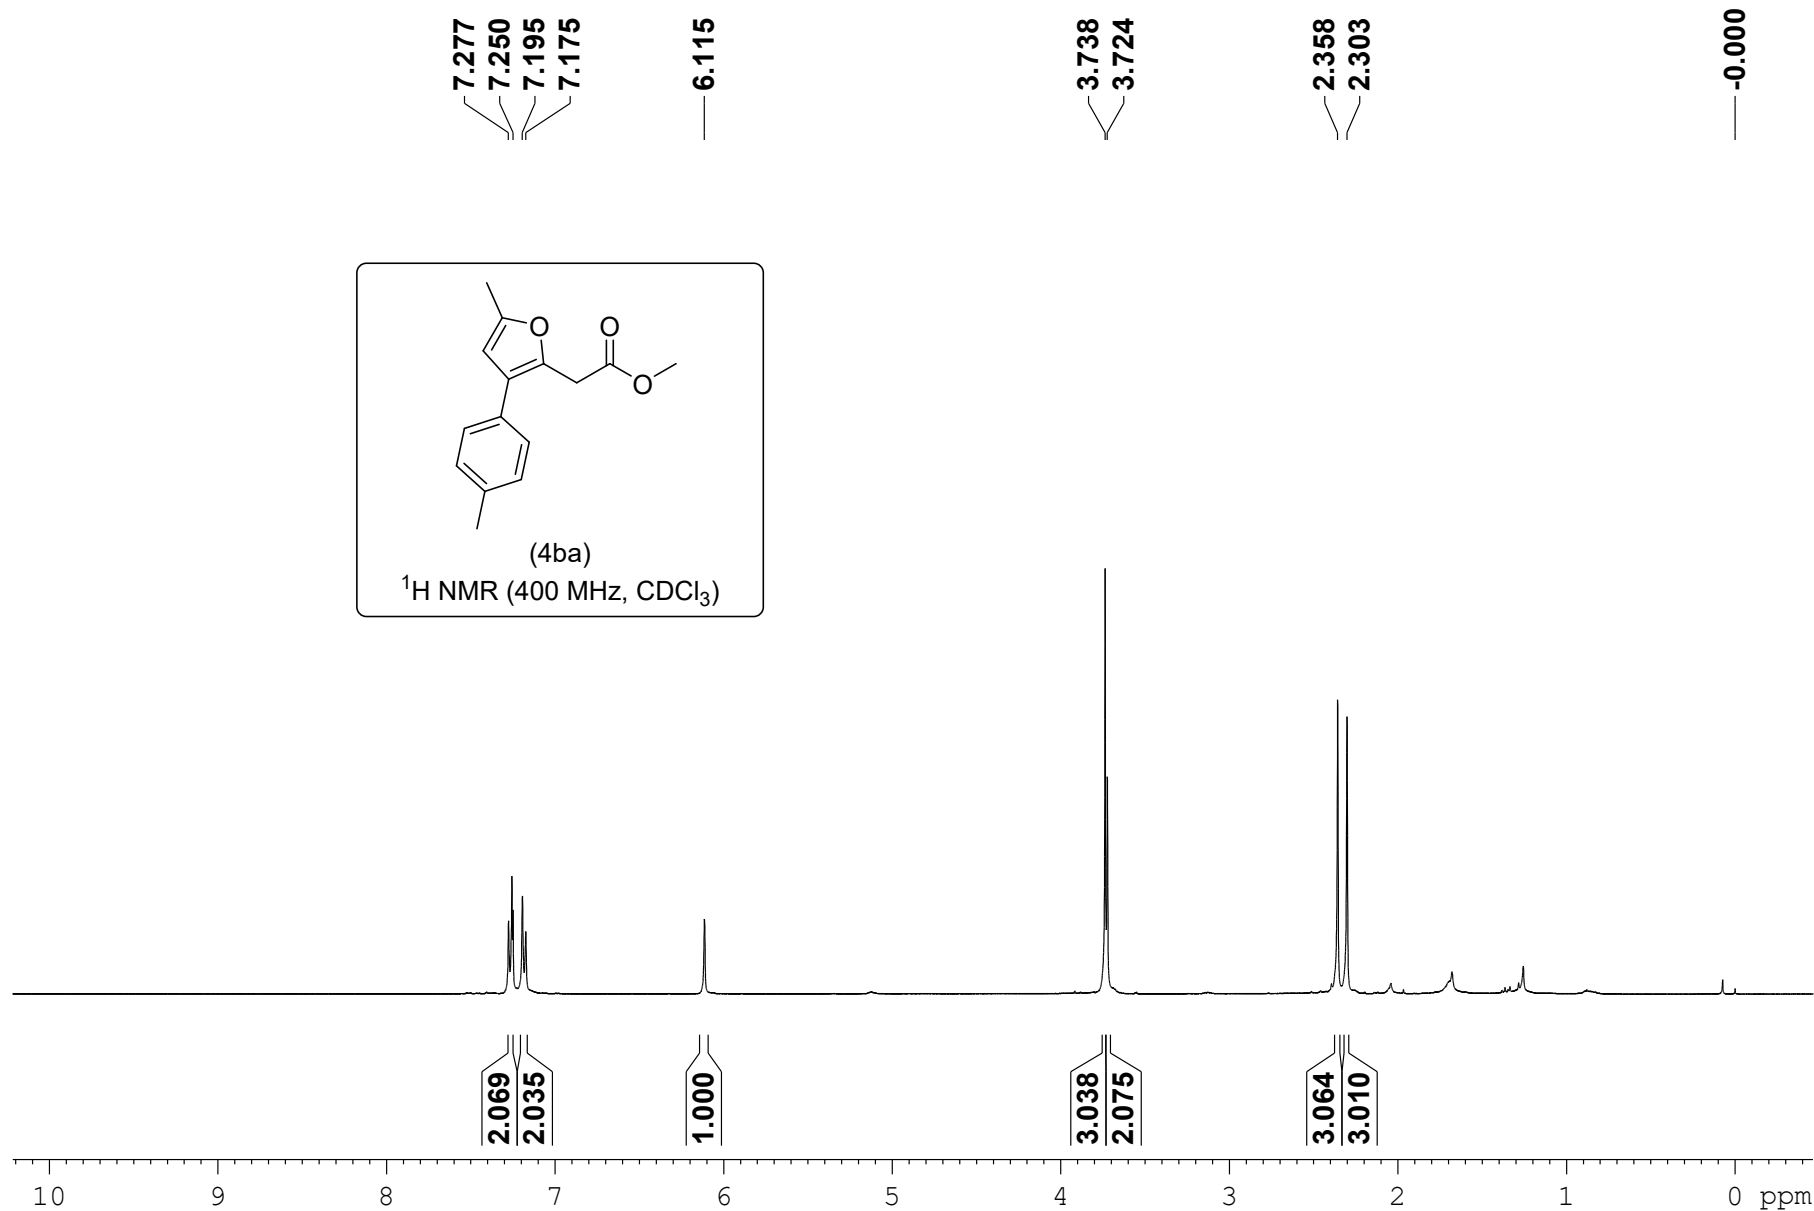

— 170.458  
 — 151.287  
 — 141.073  
 — 136.492  
 — 130.704  
 — 129.361  
 — 127.539  
 — 124.621  
 — 107.574  
 — 77.359  
 — 77.042  
 — 76.724  
 — 52.304  
 — 33.040  
 — 21.139  
 — 13.531

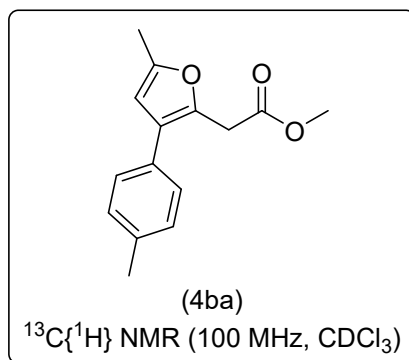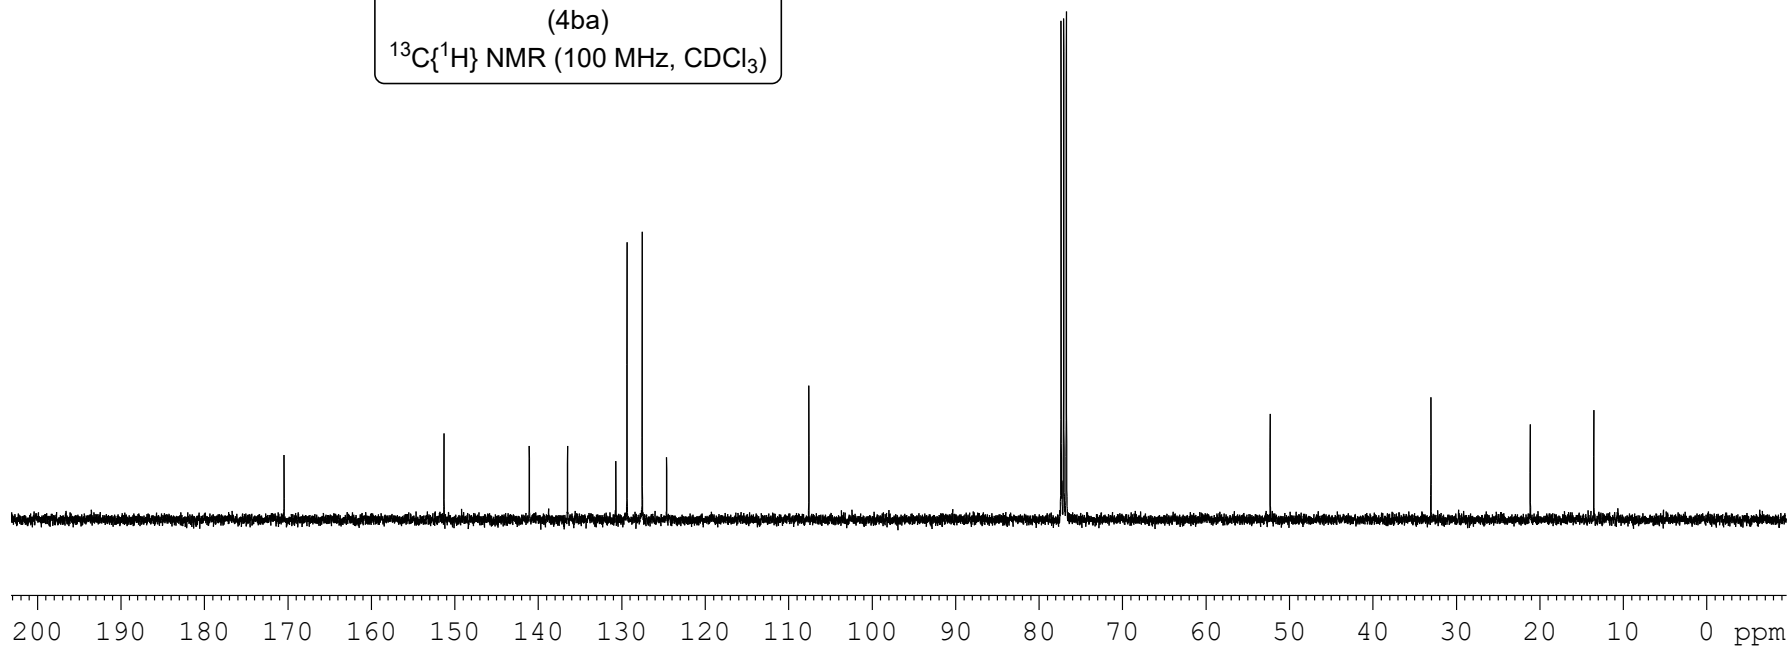

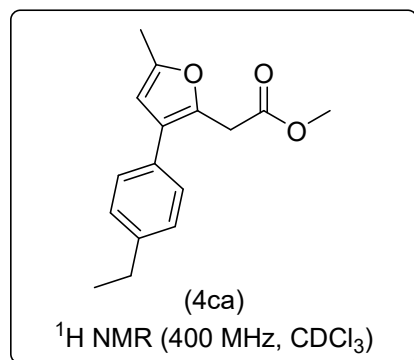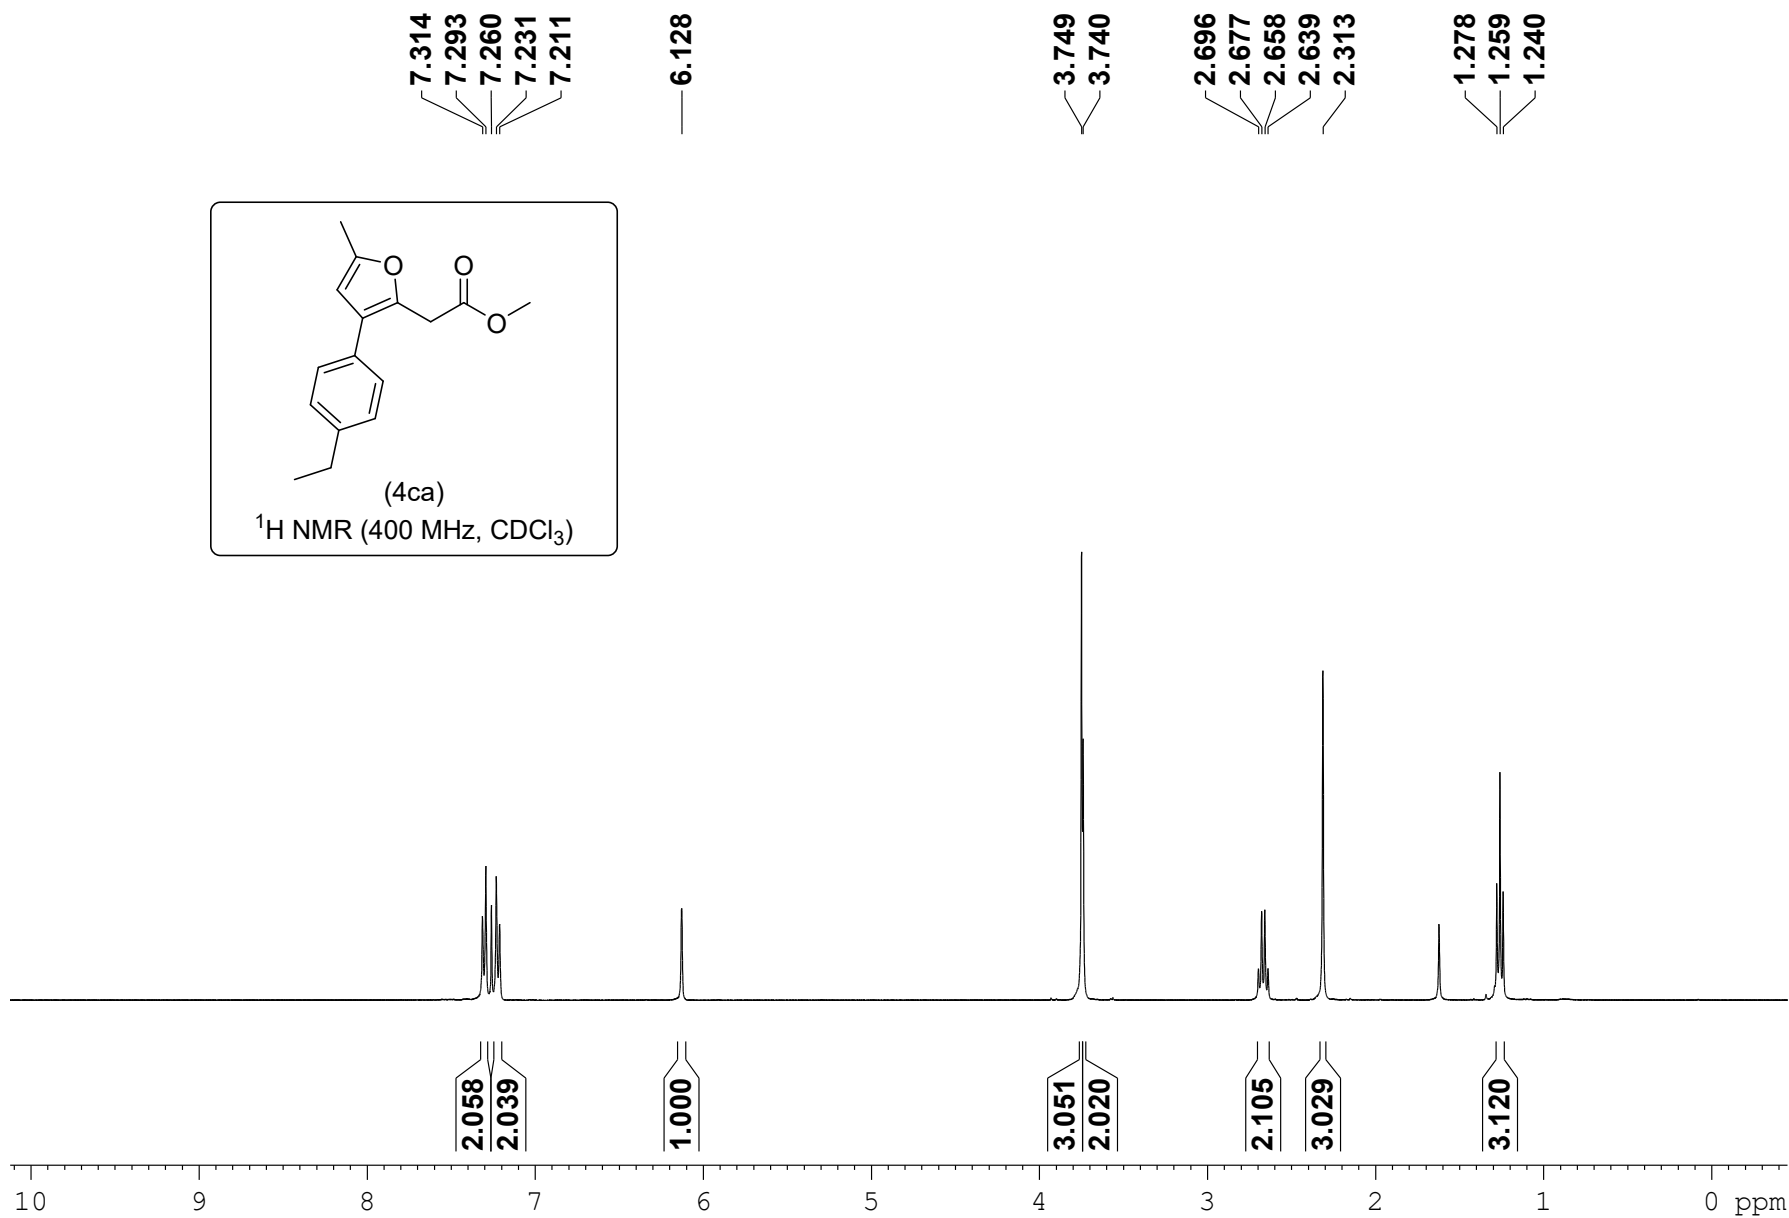



170.470  
 151.281  
 142.860  
 141.090  
 130.951  
 128.166  
 127.613  
 124.645

107.581

77.351  
 77.034  
 76.716

52.311

33.058  
 28.555

15.542  
 13.547

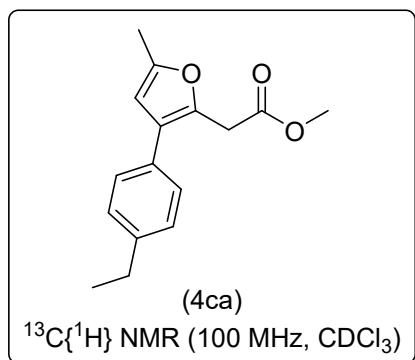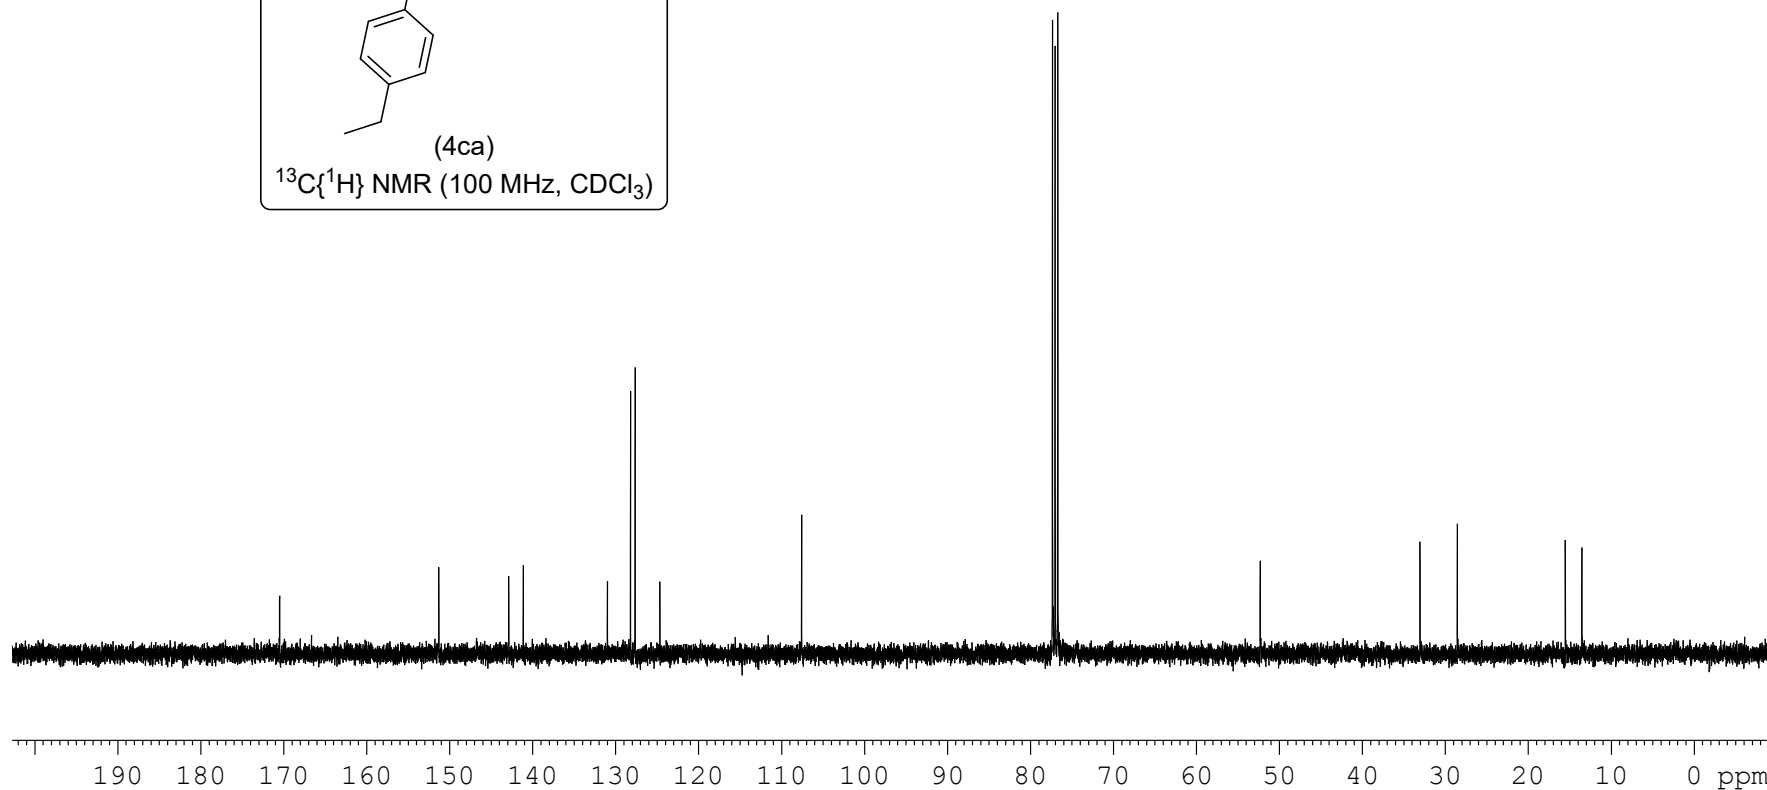

7.327  
7.320  
7.315  
7.303  
7.298  
7.291  
7.260  
6.944  
6.937  
6.932  
6.920  
6.915  
6.908  
6.100

3.824  
3.748  
3.715

2.306

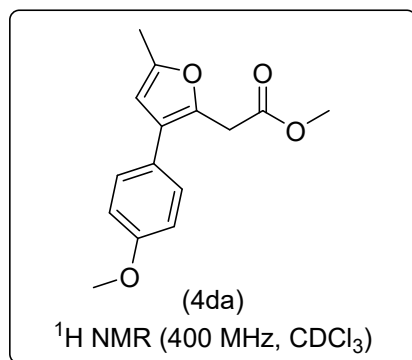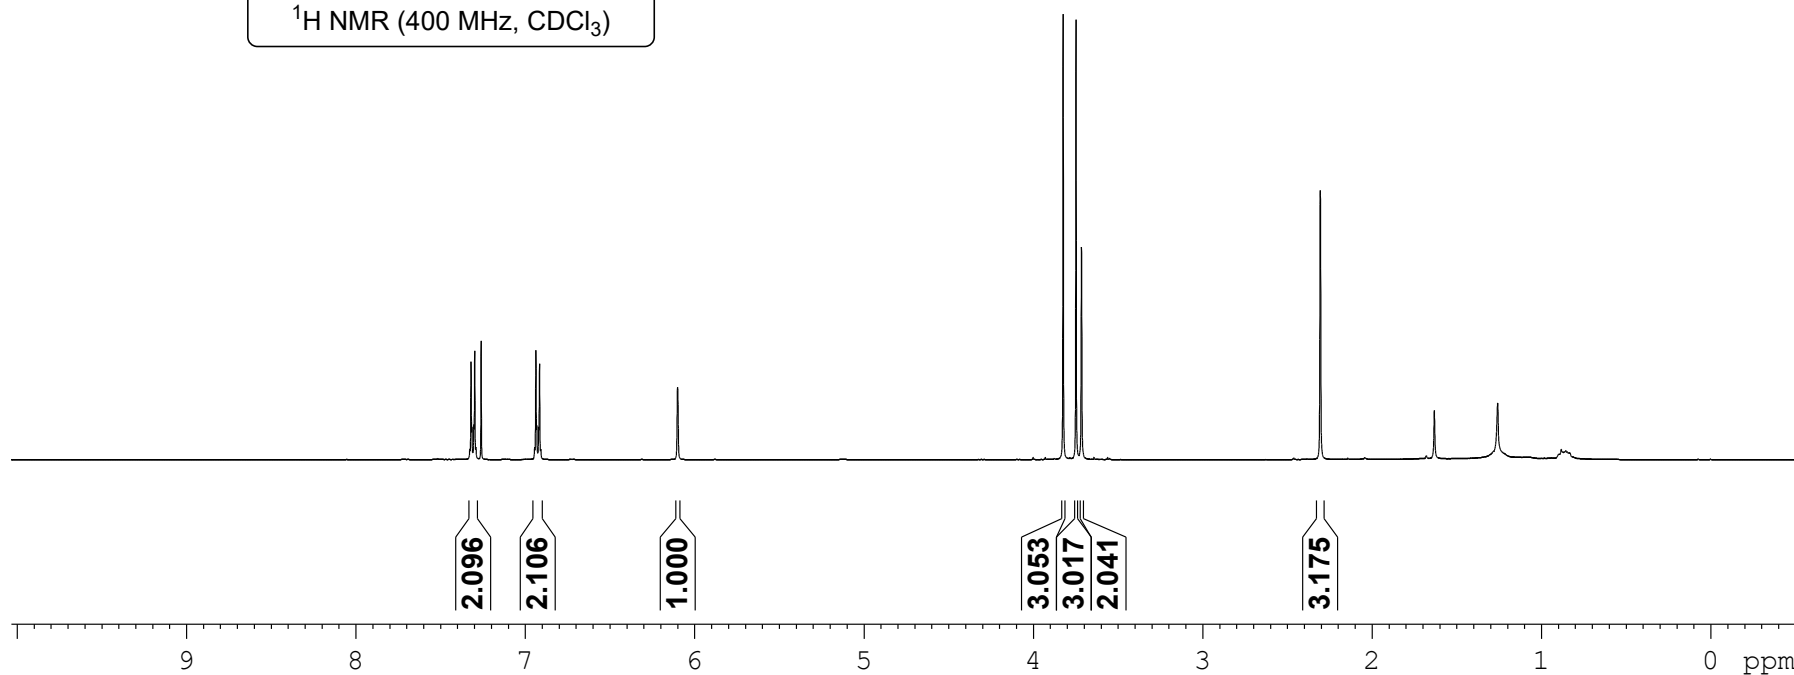

170.521  
 158.575  
 151.242  
 140.756  
 128.781  
 126.123  
 124.313  
 114.115  
 107.599

77.361  
 77.043  
 76.726

55.303  
 52.351

33.022

13.561

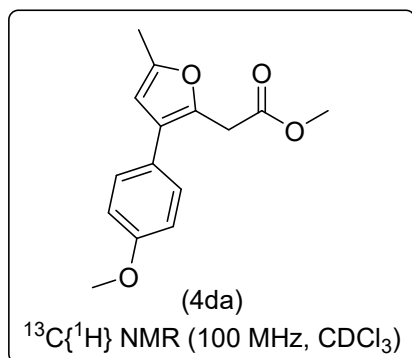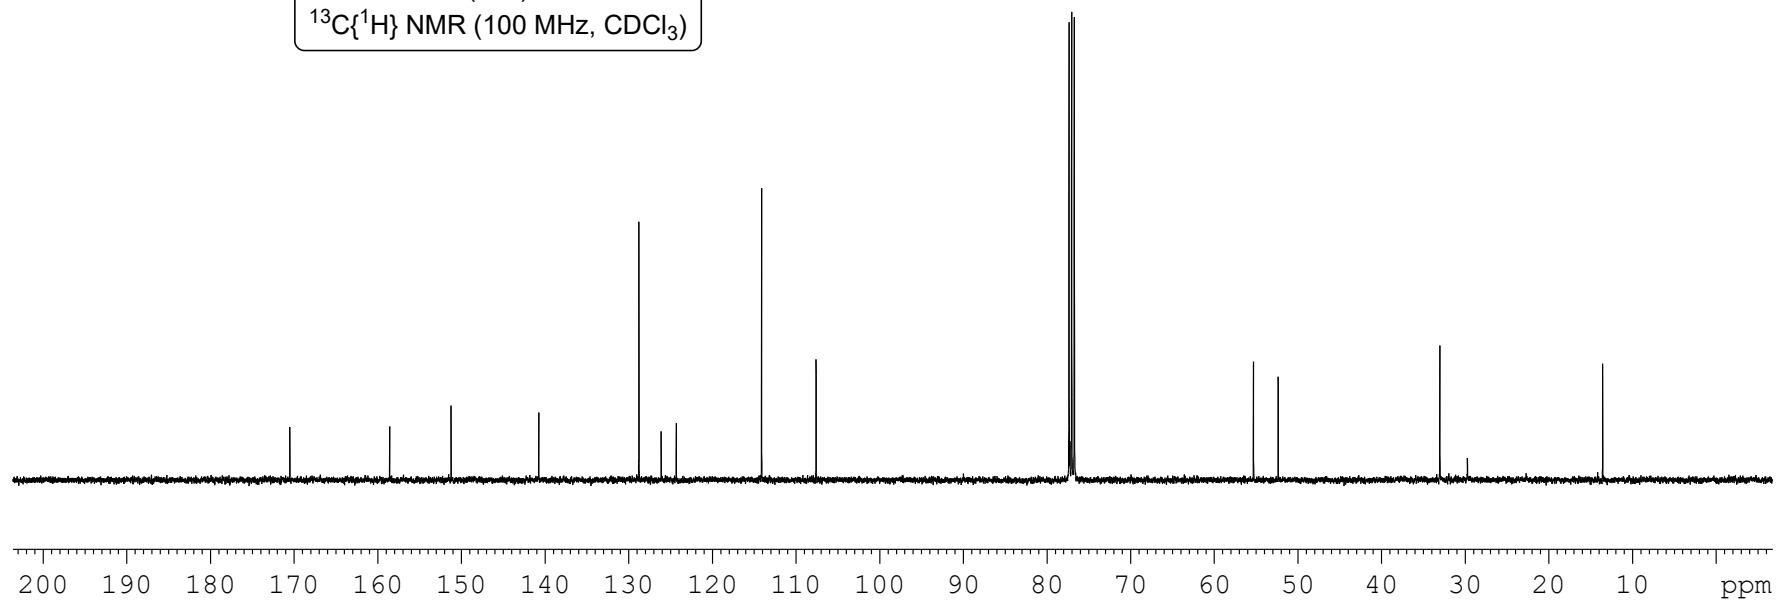

7.516  
7.510  
7.505  
7.493  
7.489  
7.483  
7.270  
7.264  
7.260  
7.247  
7.243  
7.236  
6.105

3.748  
3.703

2.308

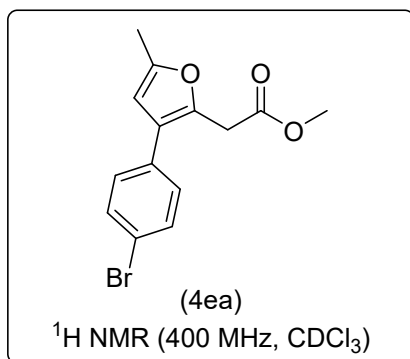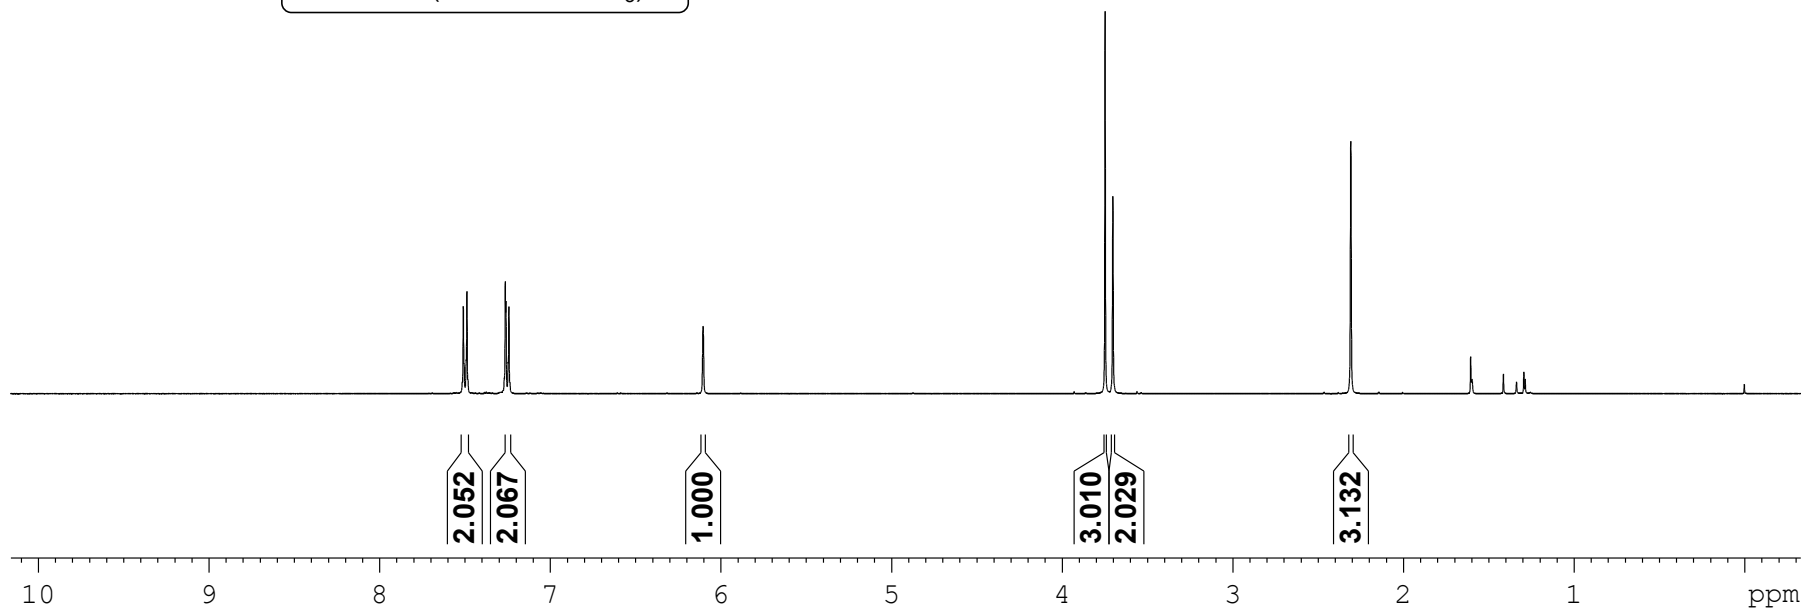

170.185  
 151.705  
 141.528  
 132.582  
 131.794  
 129.237  
 123.769  
 120.781  
 107.275

77.364  
 77.046  
 76.728

52.434

33.008

13.523

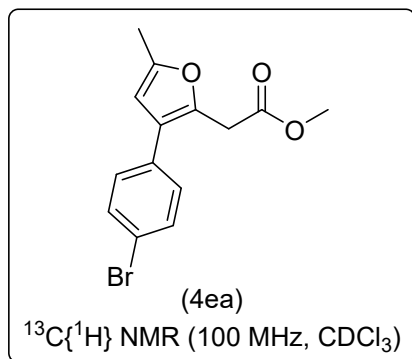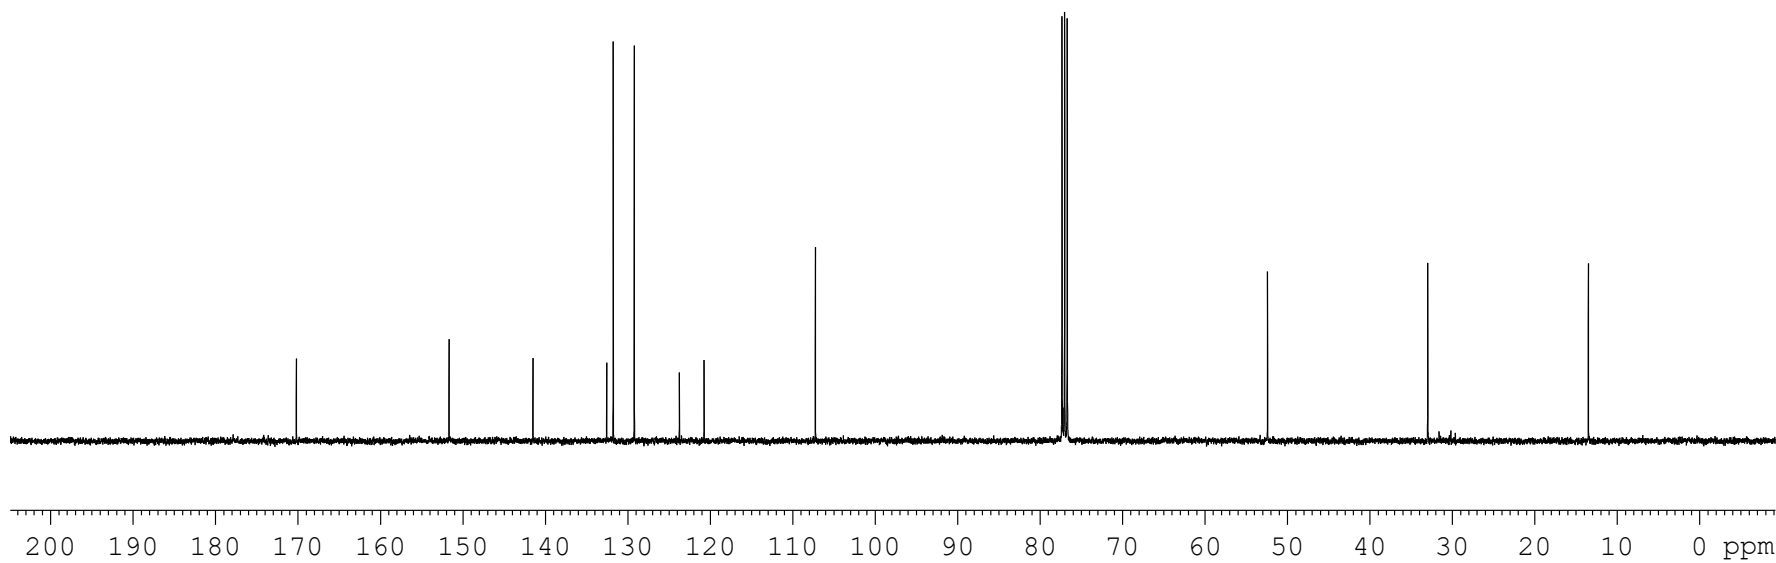

7.360  
7.355  
7.344  
7.339  
7.321  
7.315  
7.304  
7.299  
7.260  
6.106

3.749  
3.705

2.309

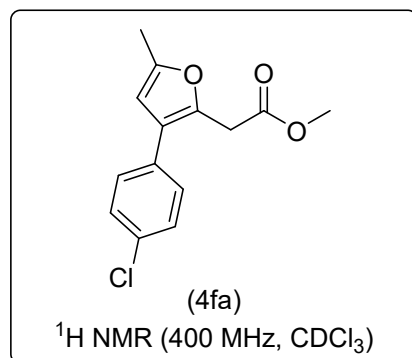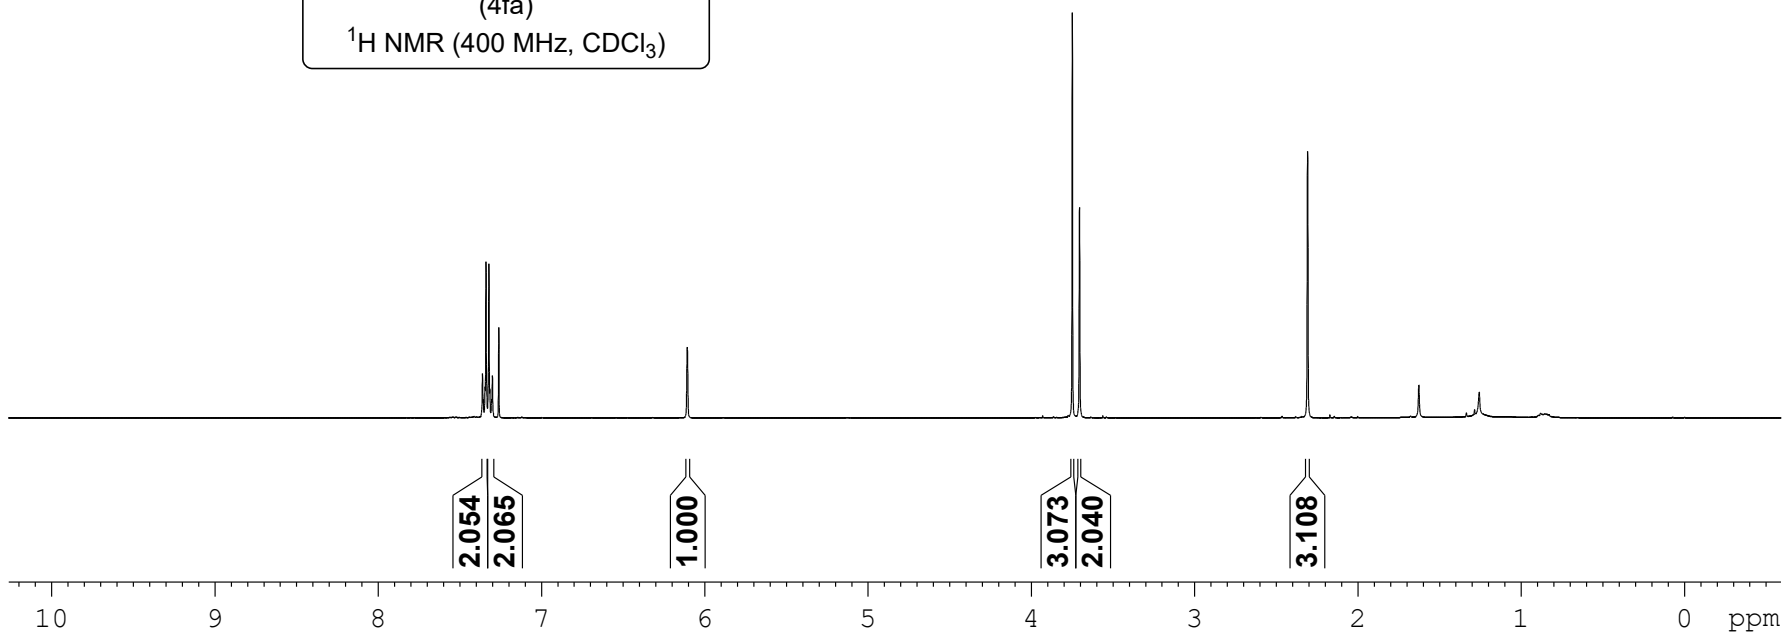

170.215  
 151.668  
 141.518  
 132.689  
 132.114  
 128.898  
 128.841  
 123.742  
 107.335

77.359  
 77.042  
 76.724

52.428

33.004

13.524

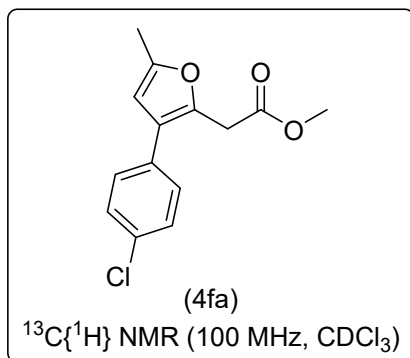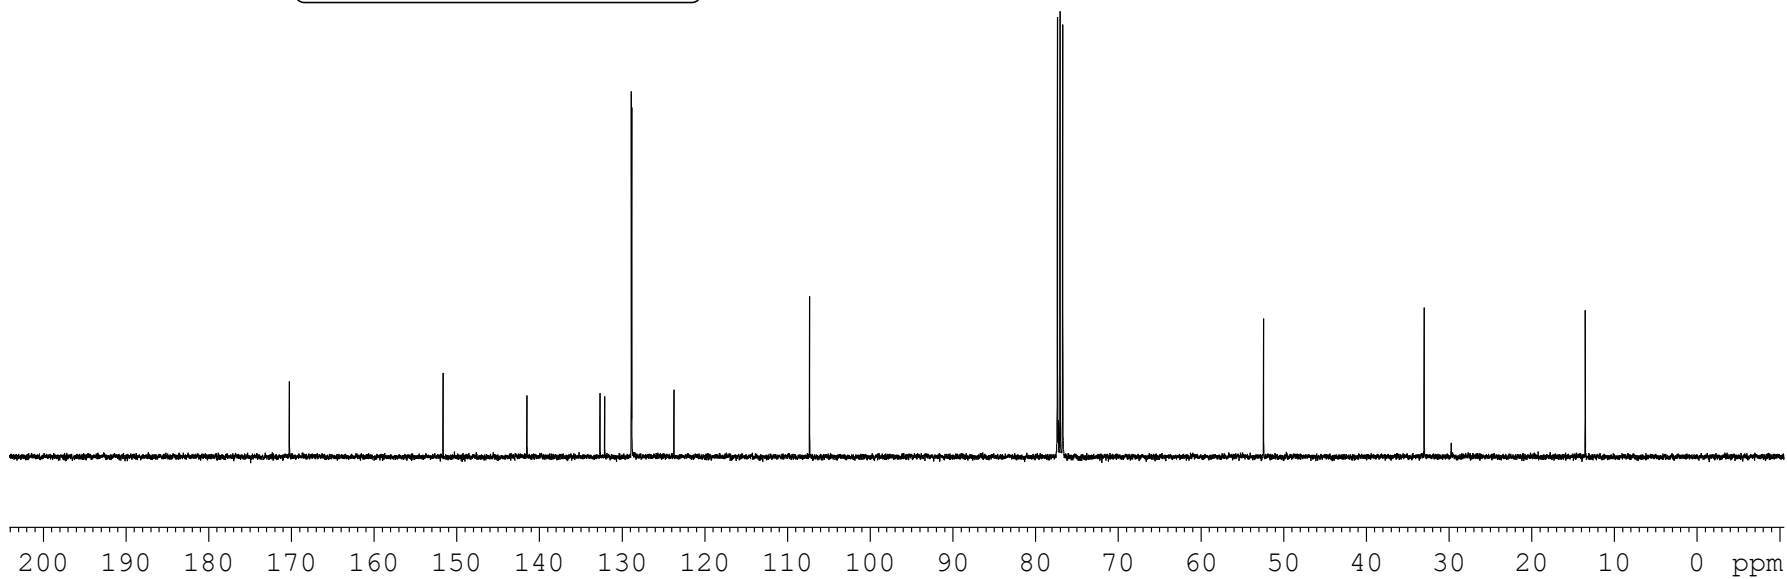

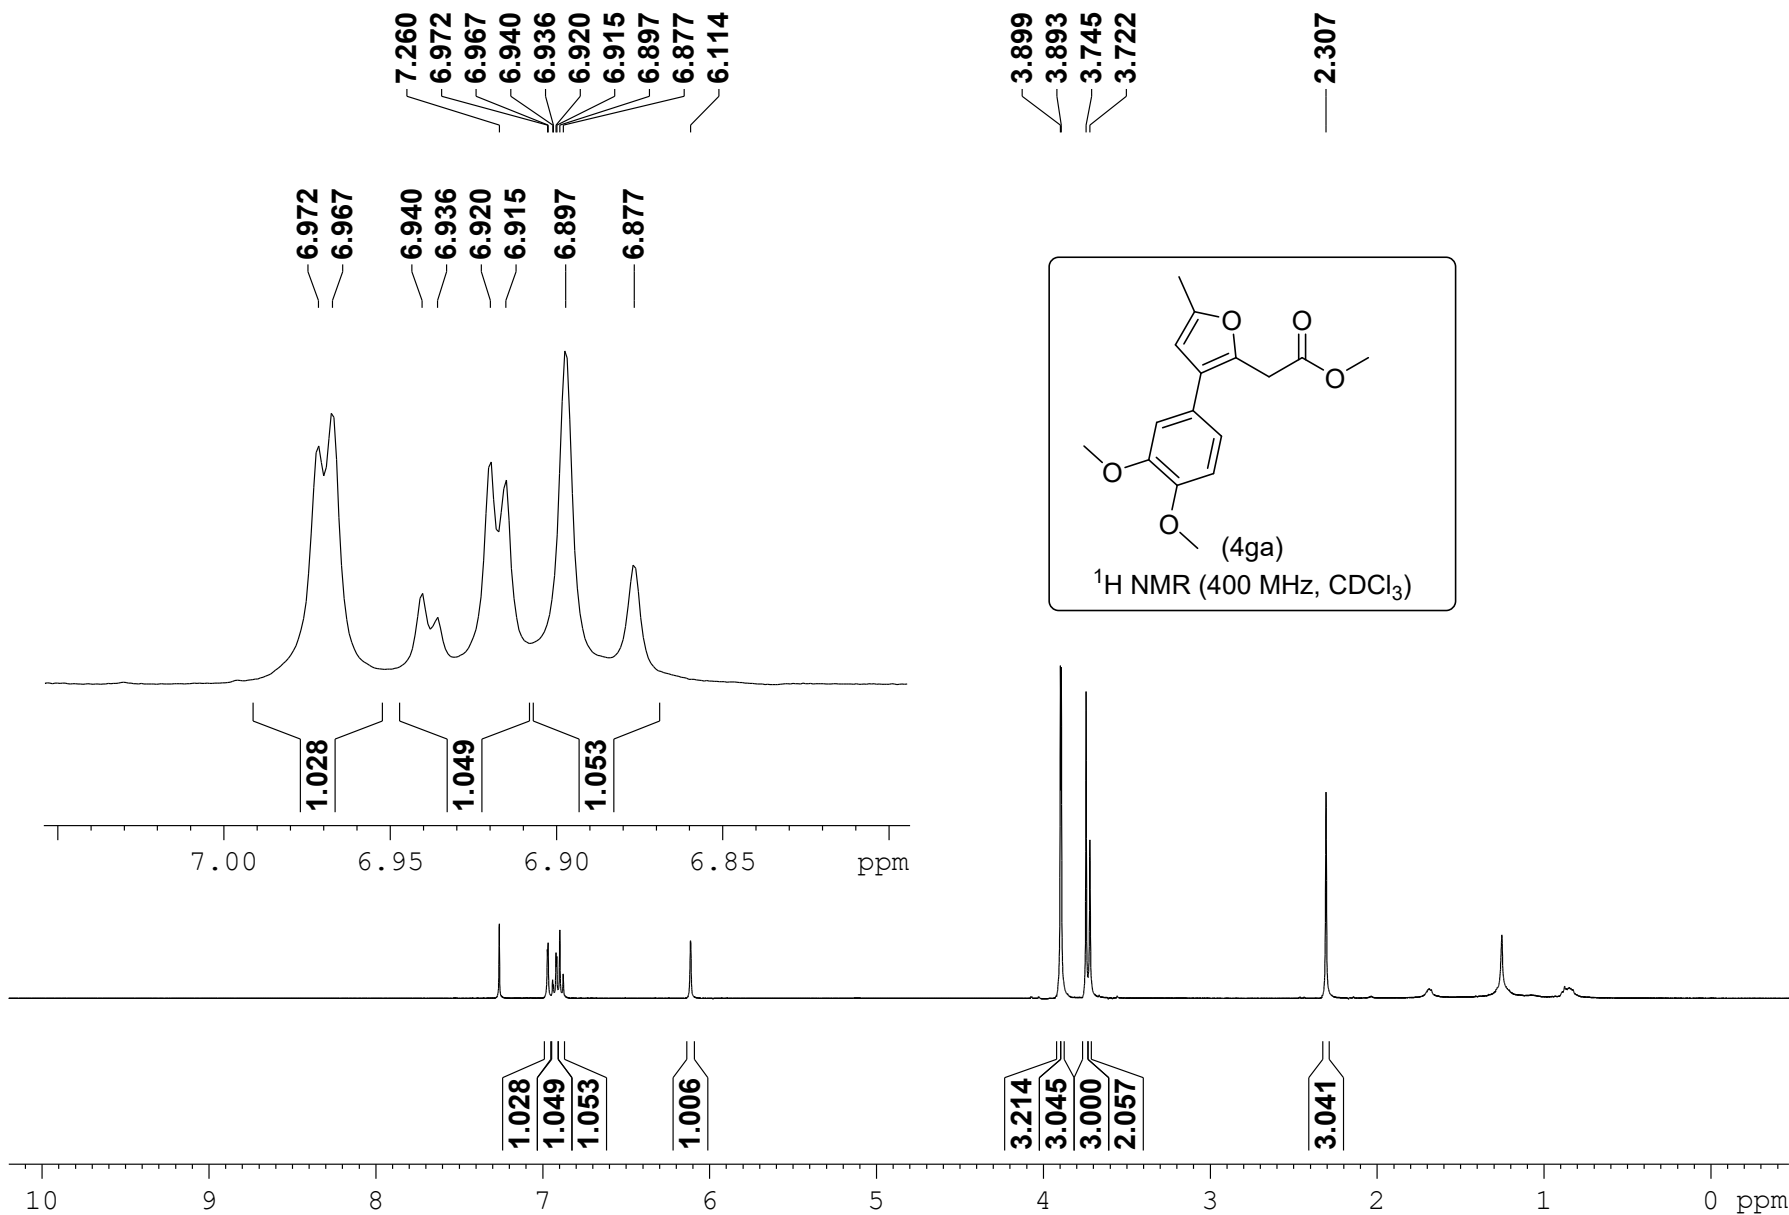



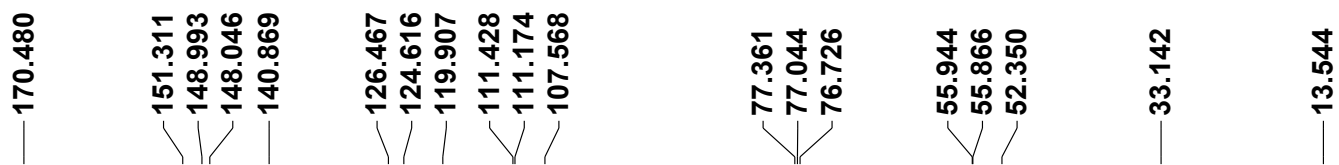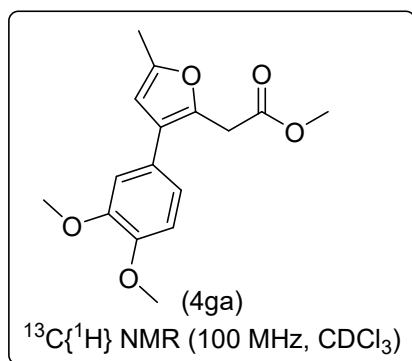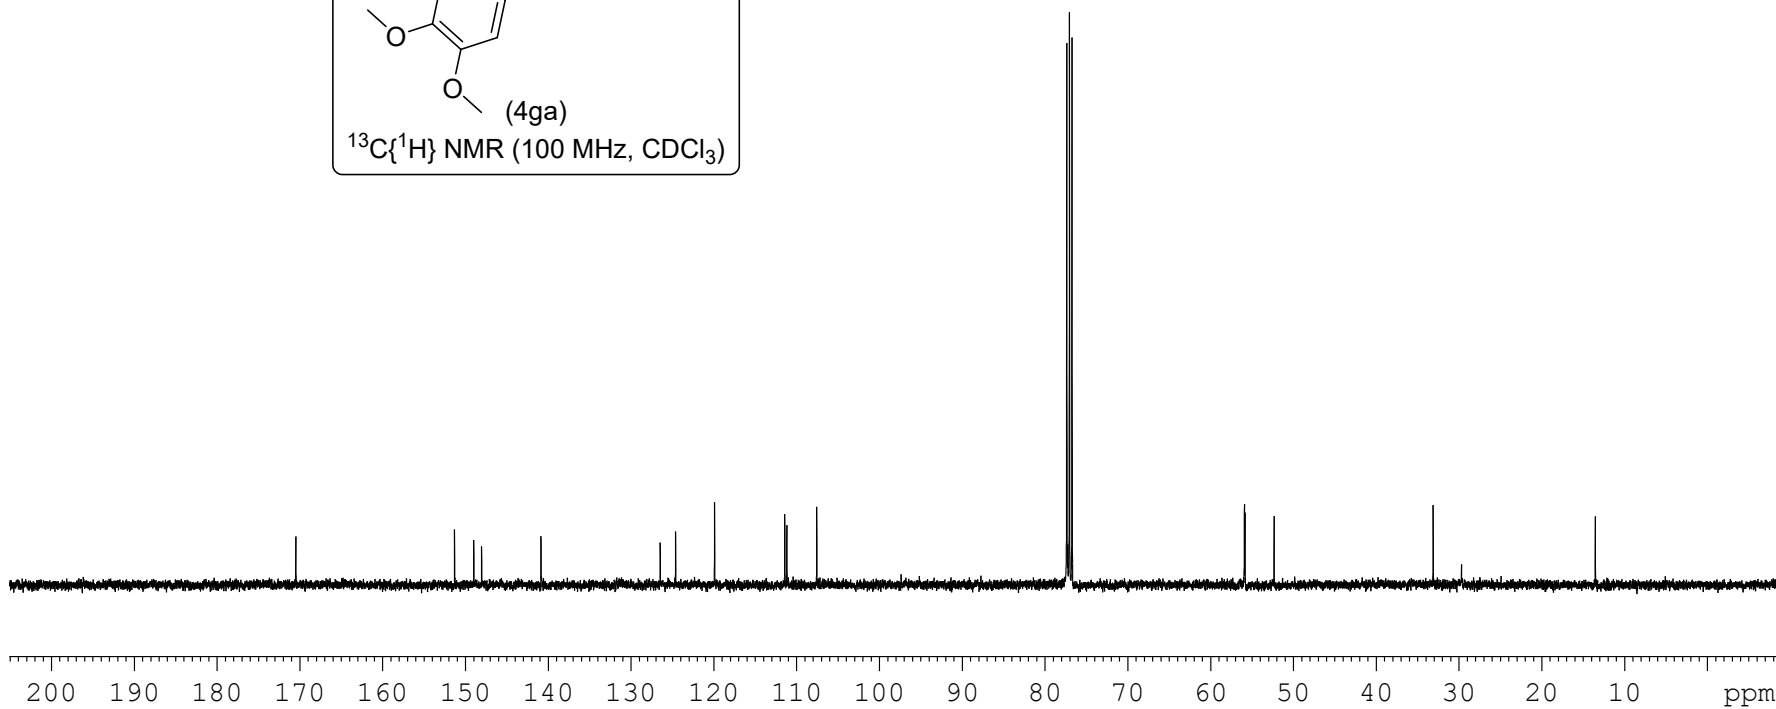

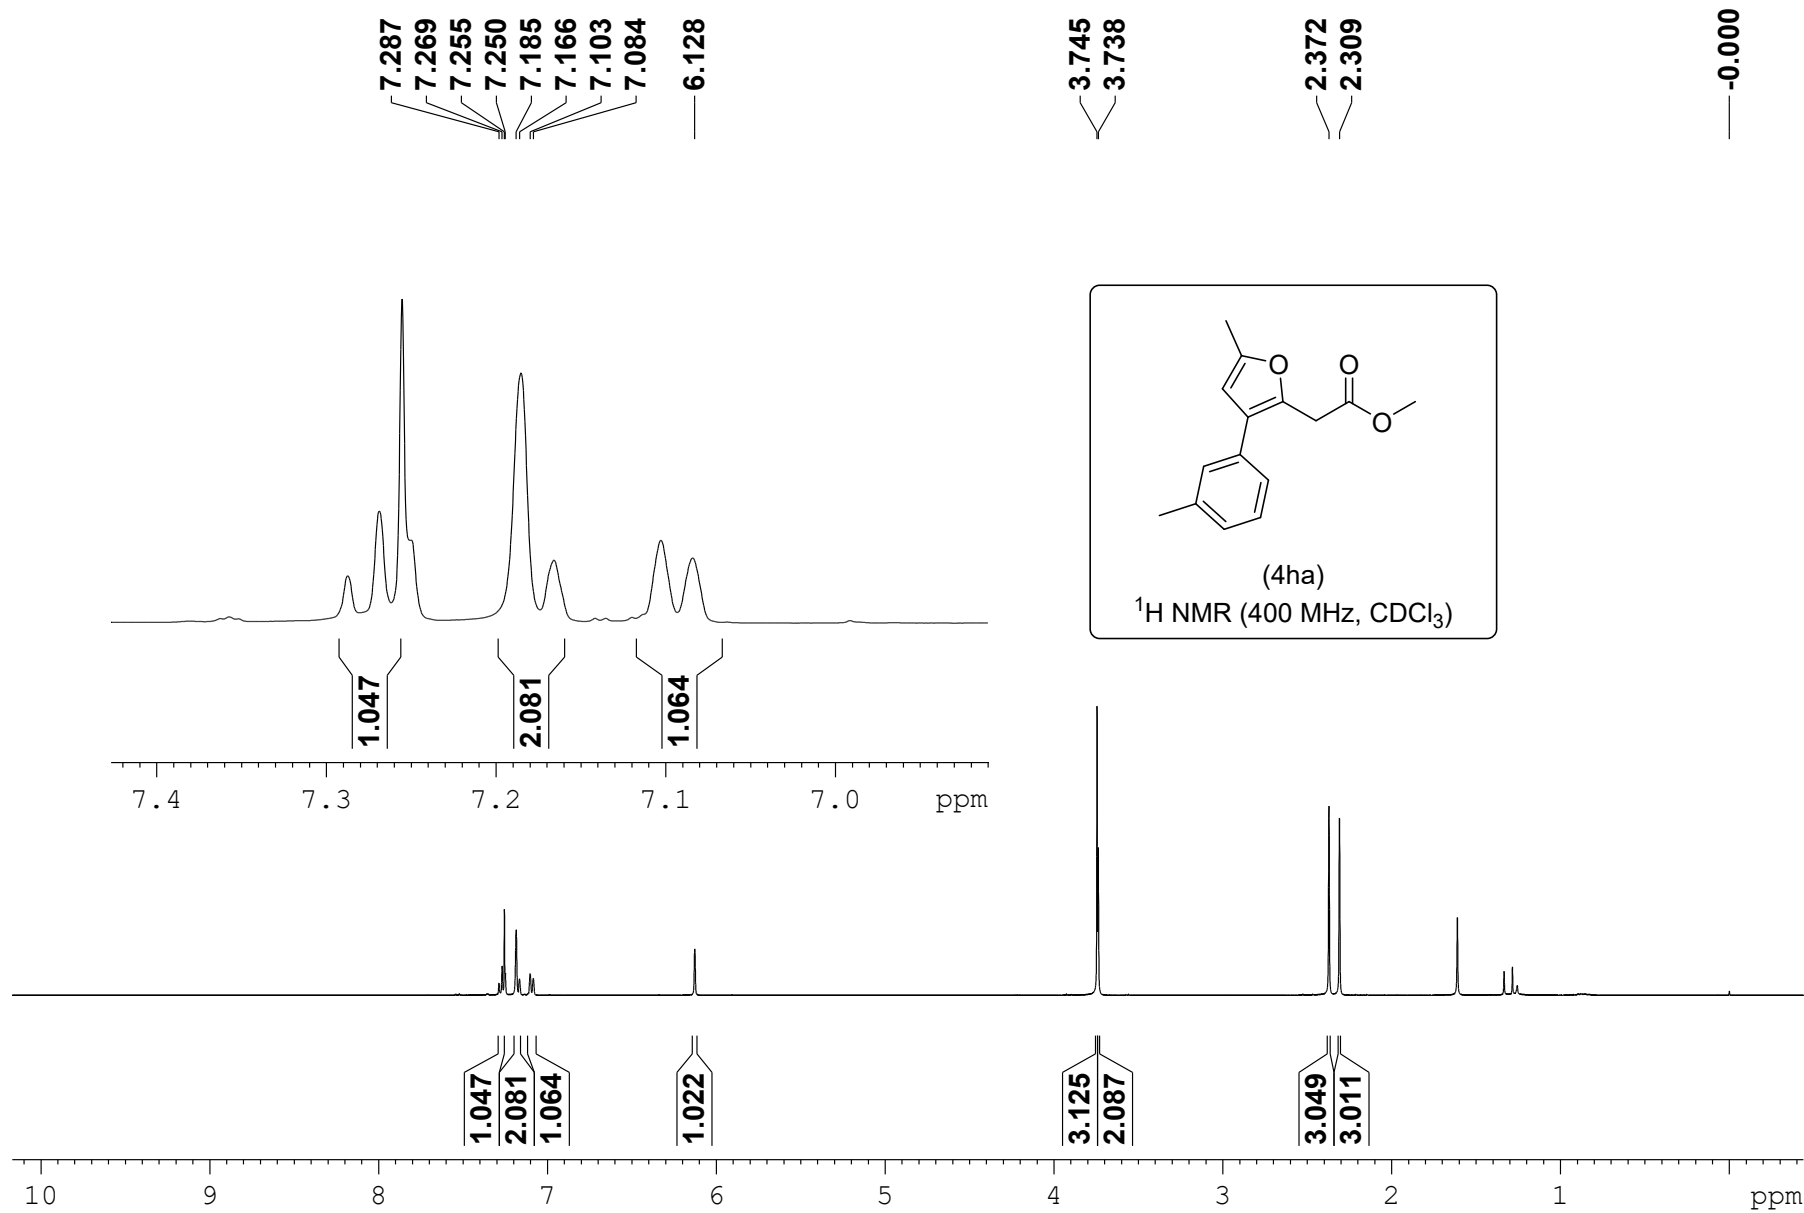

— 170.437  
 — 151.332  
 — 141.276  
 — 138.233  
 — 133.564  
 — 128.559  
 — 128.431  
 — 127.576  
 — 124.774  
 — 124.715  
 — 107.571

77.349  
 77.031  
 76.713

— 52.318

— 33.058

— 21.499

— 13.543

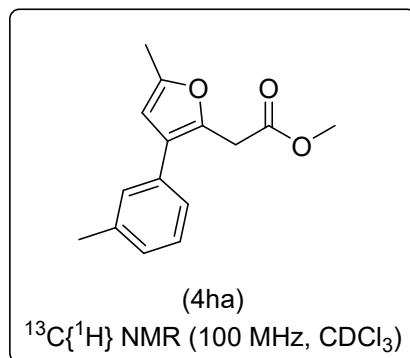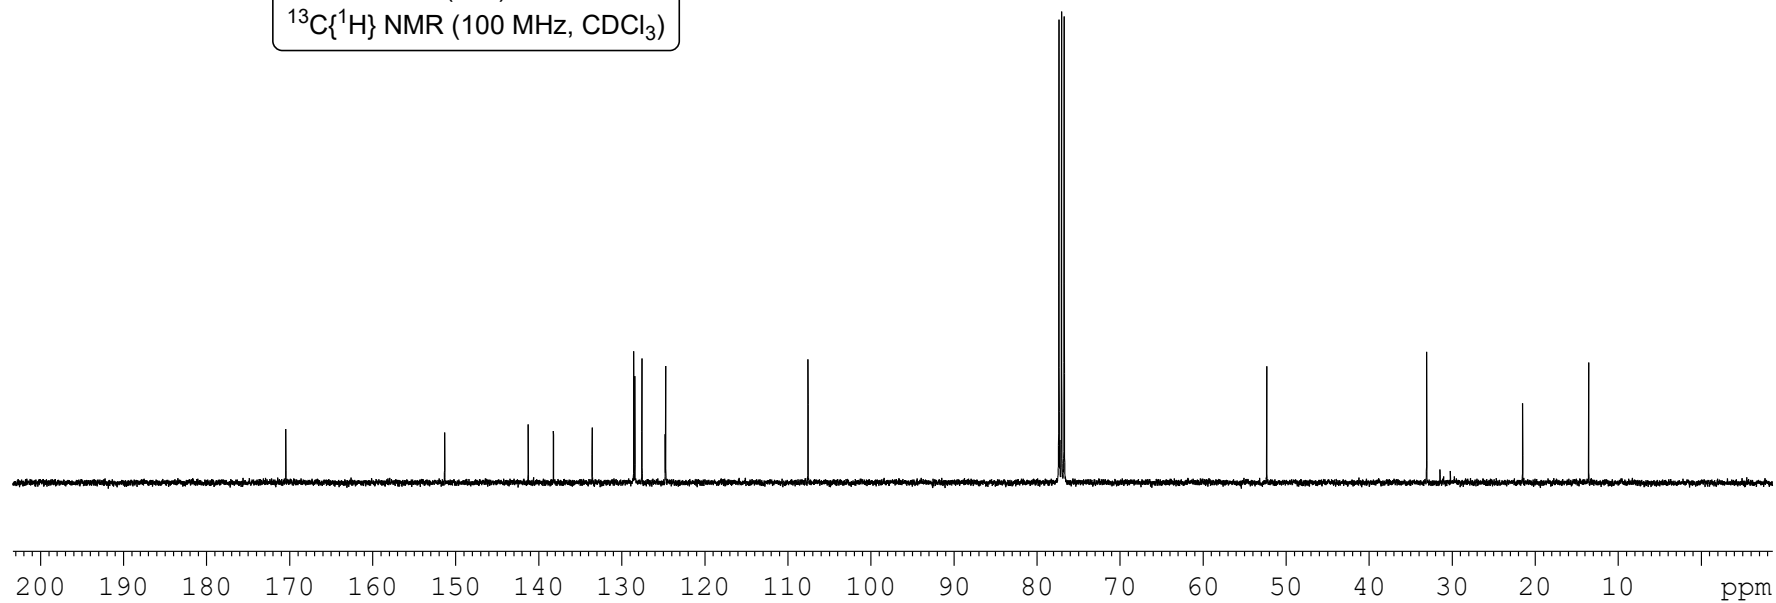

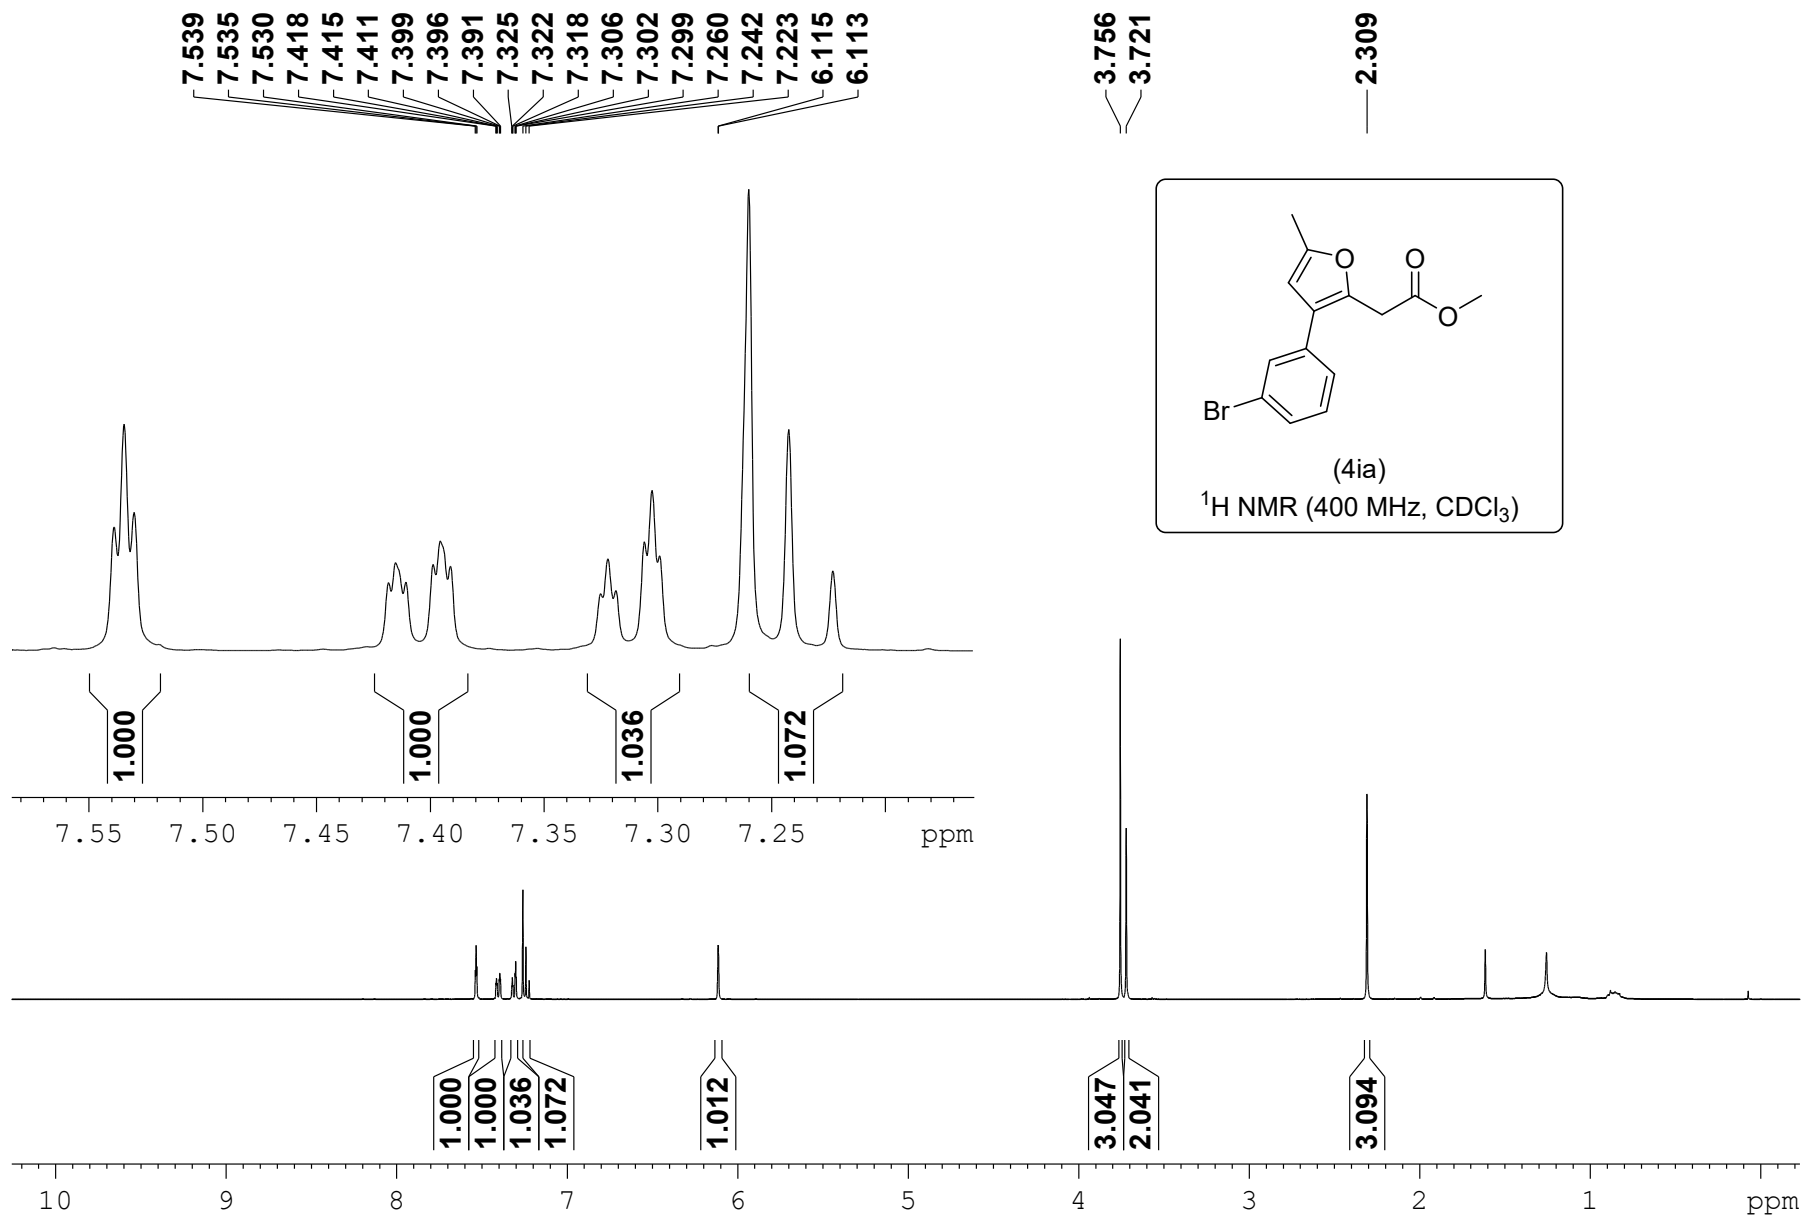

— 170.122  
 — 151.734  
 — 141.832  
 — 135.786  
 — 130.624  
 — 130.182  
 — 129.791  
 — 126.195  
 — 123.521  
 — 122.731  
 — 107.287

77.358  
 77.040  
 76.723

— 52.441

— 33.007

— 13.523

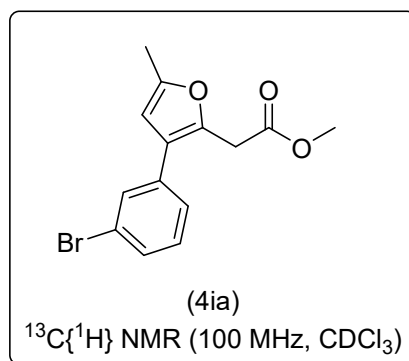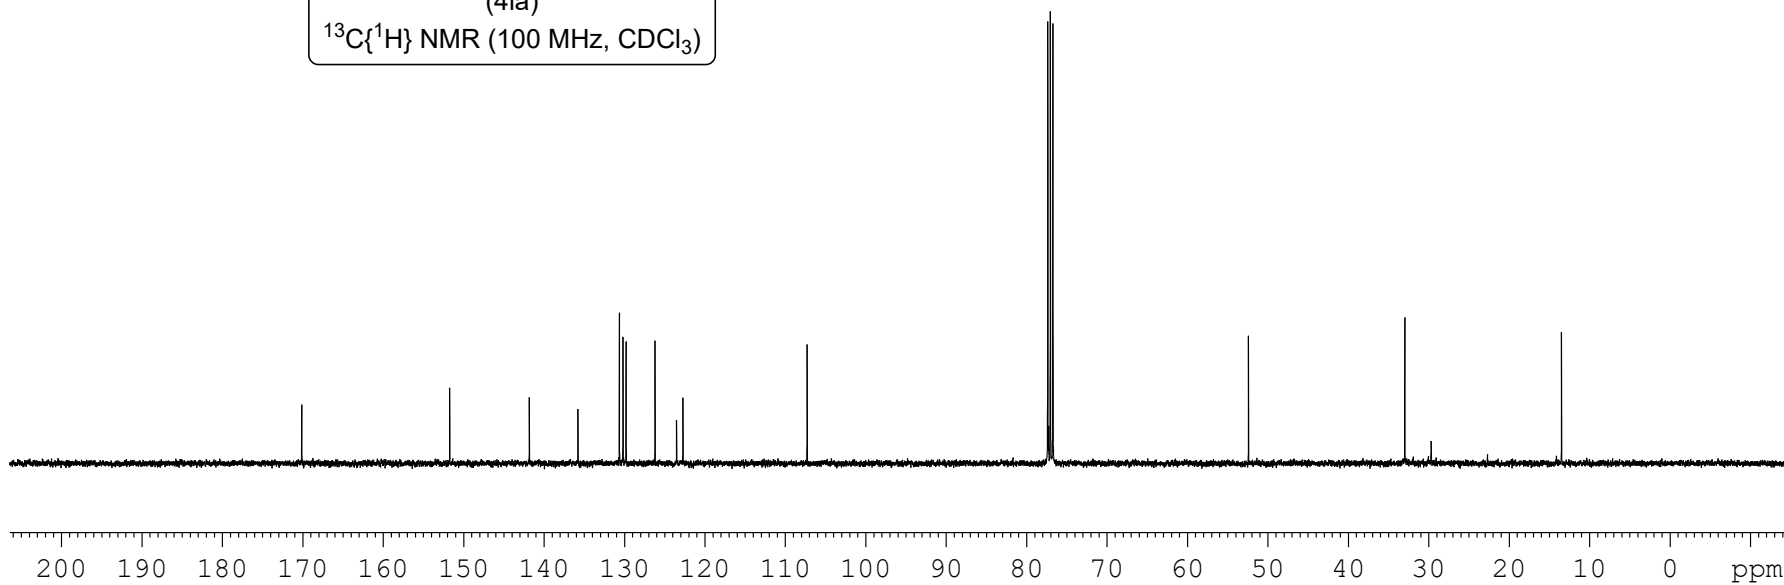

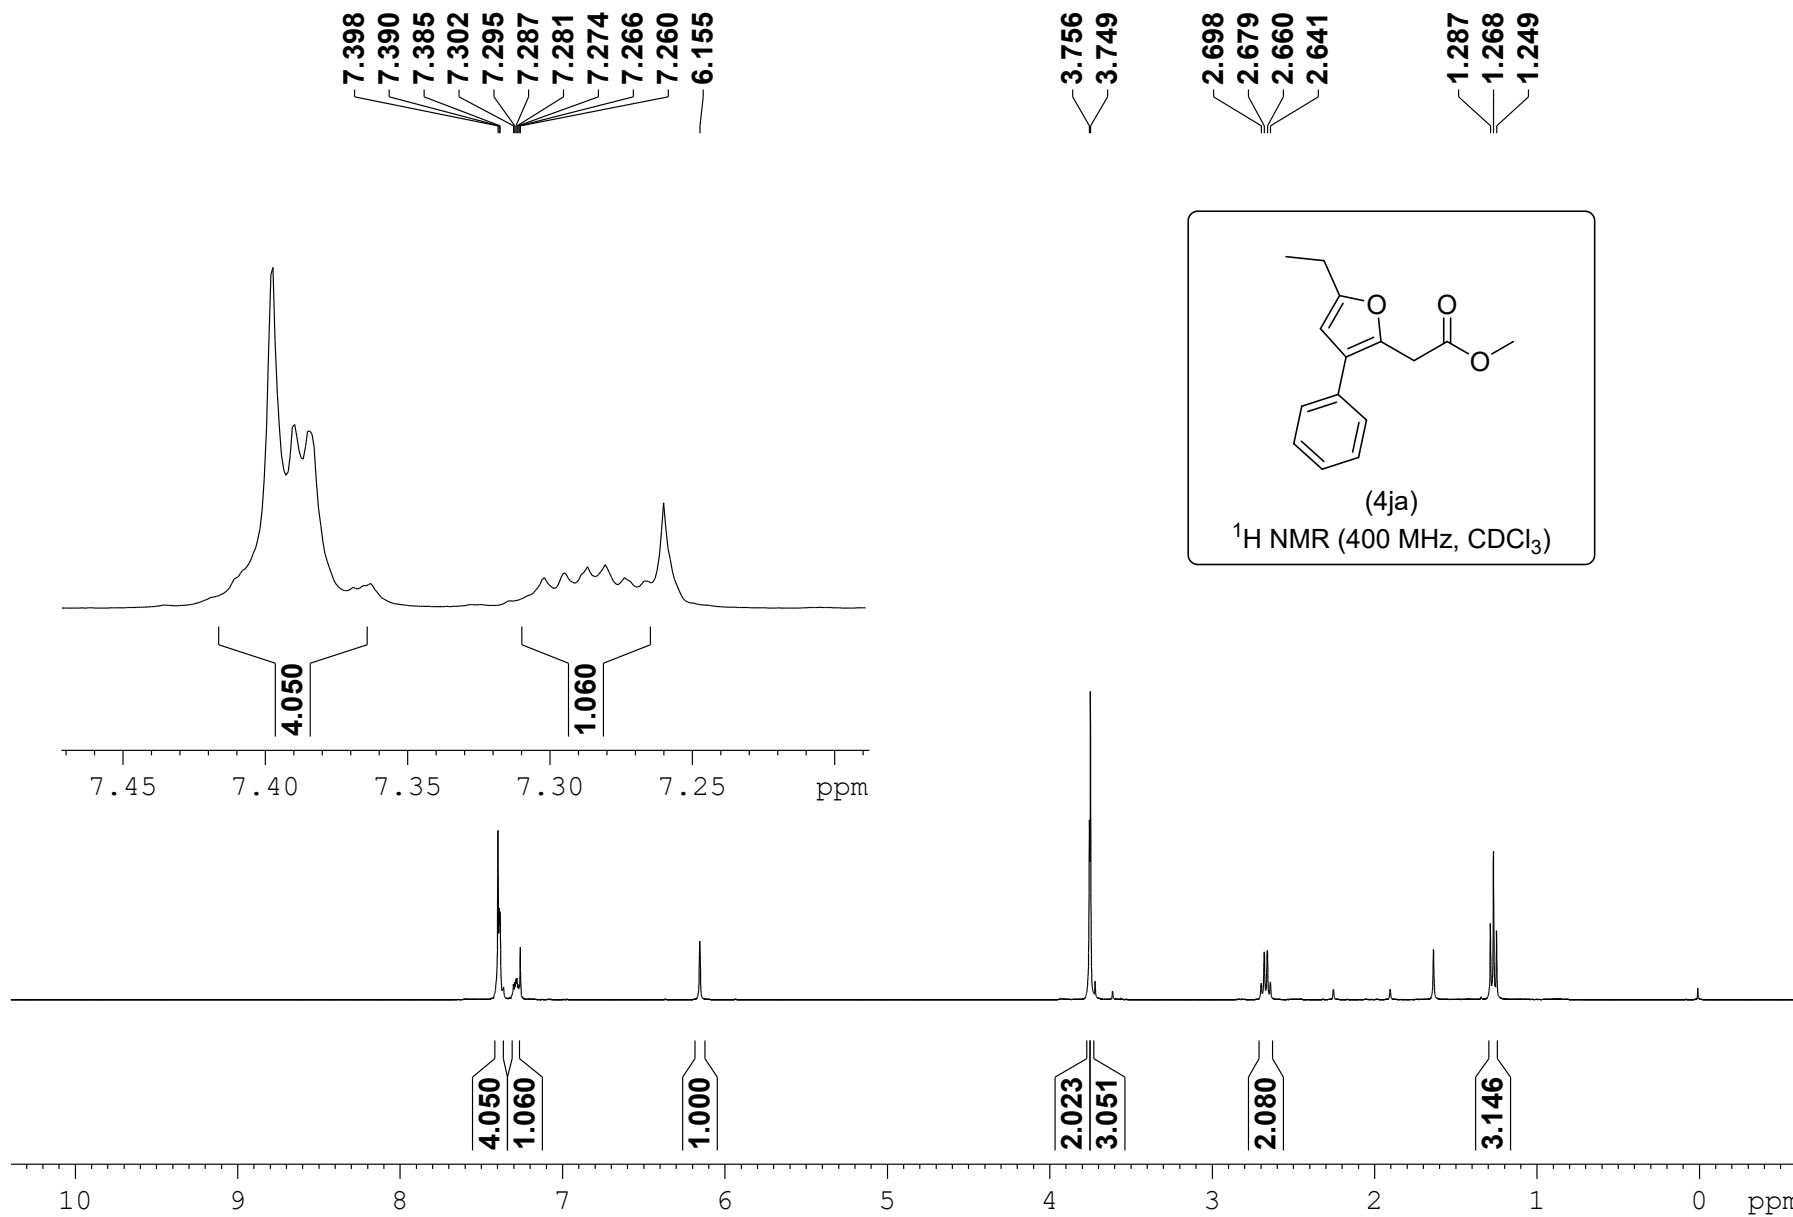

— 170.402  
 — 157.122  
 — 141.219  
 — 133.742  
 — 128.653  
 — 127.663  
 — 126.777  
 — 124.506  
 — 105.918  
 — 77.359  
 — 77.042  
 — 76.724  
 — 52.313  
 — 33.075  
 — 21.318  
 — 11.988

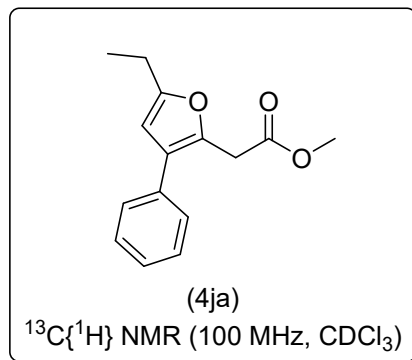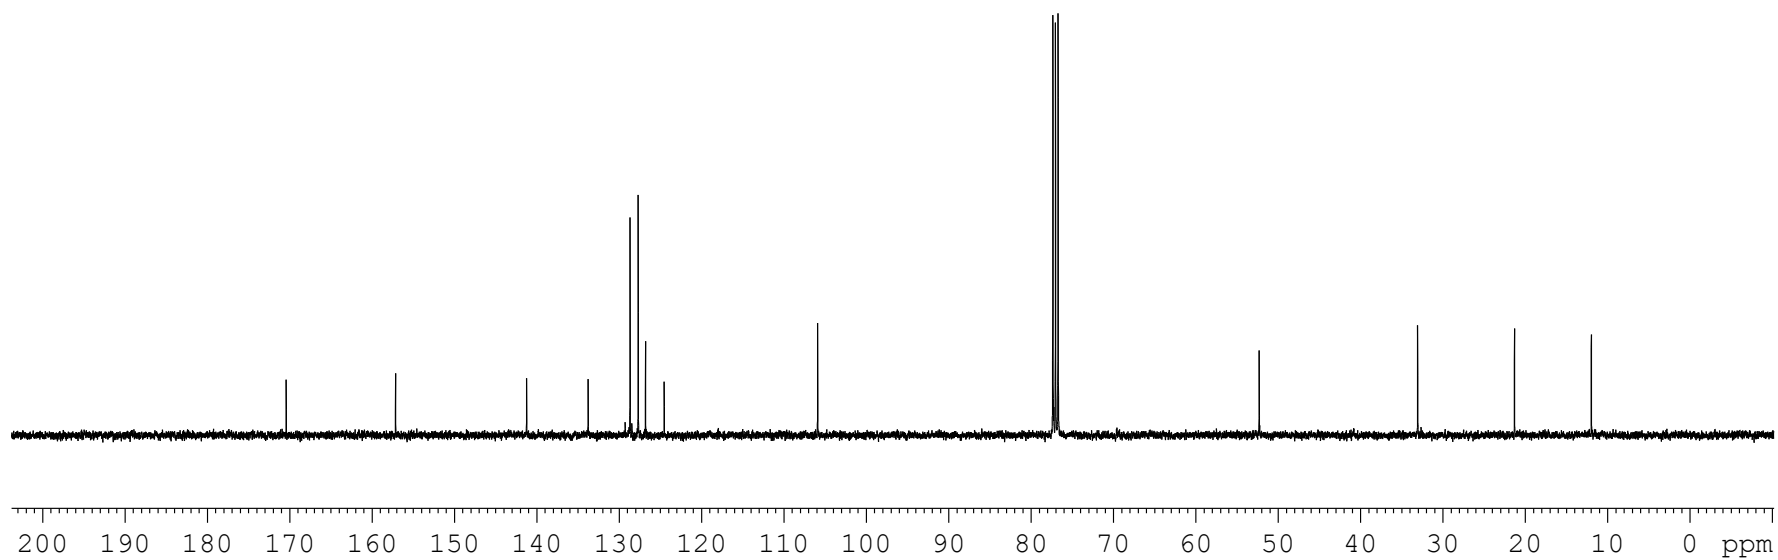

7.415  
7.403  
7.395  
7.389  
7.368  
7.316  
7.310  
7.304  
7.297  
7.289  
7.282  
7.275  
7.267  
7.260  
6.165

3.764  
3.745

2.519  
2.502  
2.048  
2.031  
2.014  
1.997  
1.980  
1.964  
1.947  
0.984  
0.968

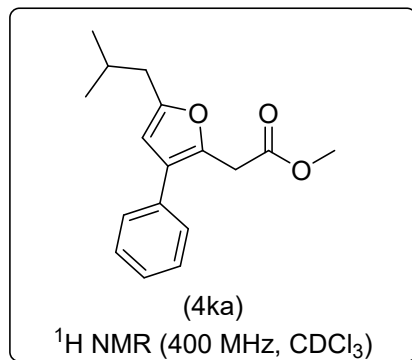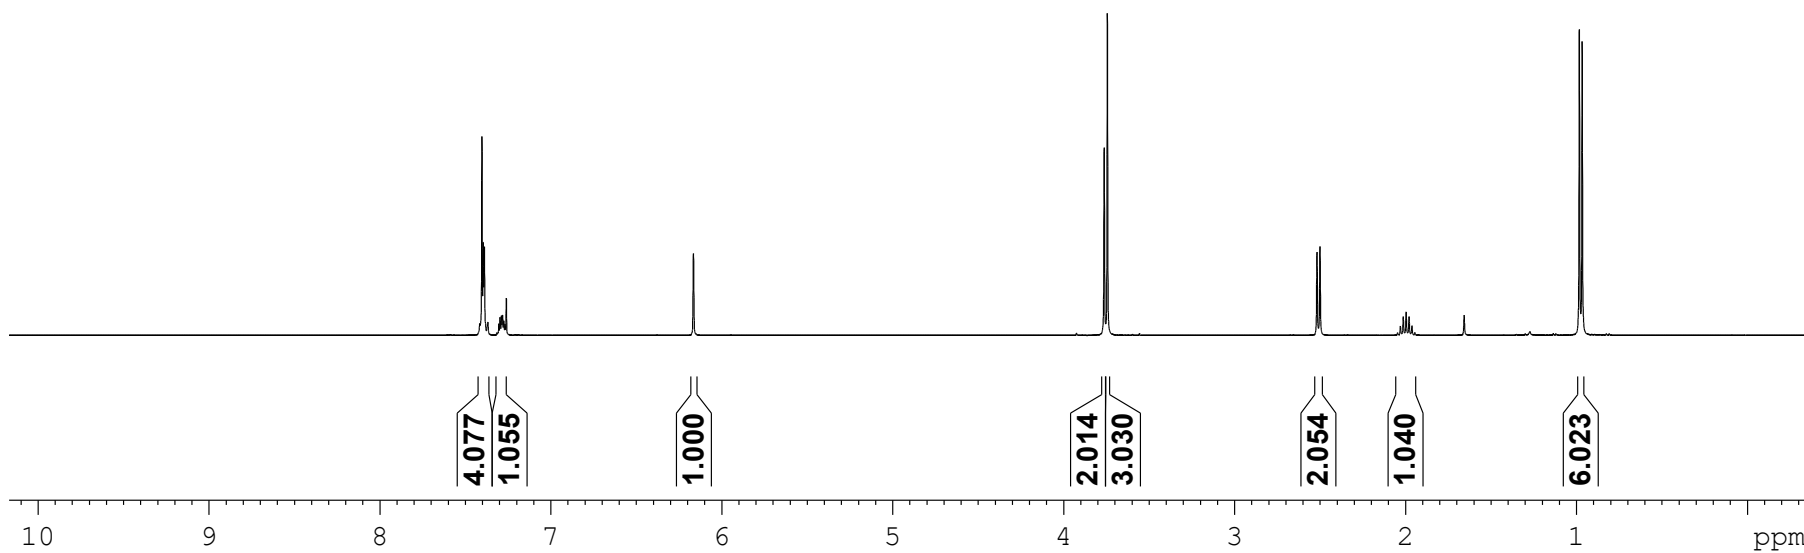



—170.382

—154.948

—141.299

—133.748

—128.662

—127.658

—126.754

—124.405

—107.606

—77.383

—77.066

—76.748

—52.298

—37.142

—33.130

—27.896

—22.390

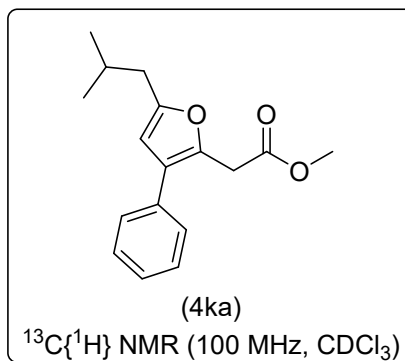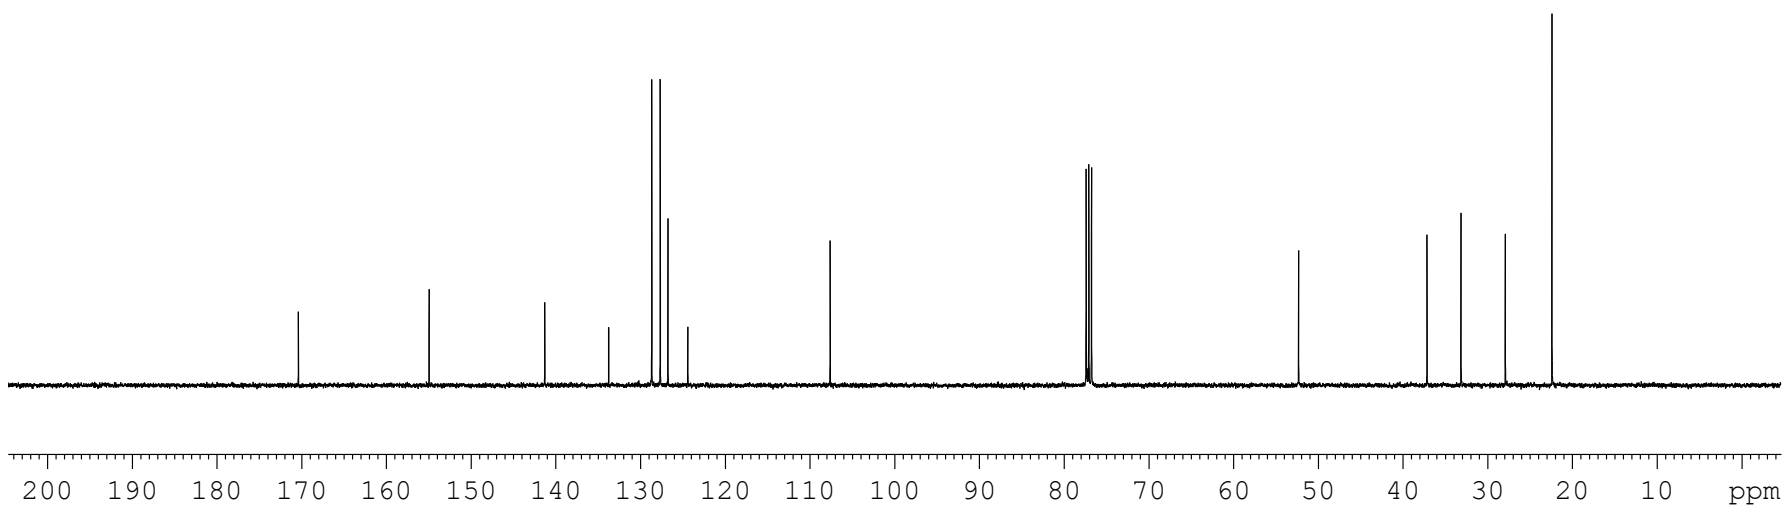

7.410  
7.397  
7.389  
7.383  
7.377  
7.368  
7.362  
7.313  
7.306  
7.300  
7.293  
7.285  
7.279  
7.272  
7.265  
7.260  
6.151

3.756  
3.747  
2.646  
2.627  
2.608  
1.714  
1.695  
1.689  
1.677  
1.657  
1.652  
1.639  
1.389  
1.379  
1.371  
1.362  
1.353  
1.346  
1.339  
0.937  
0.924

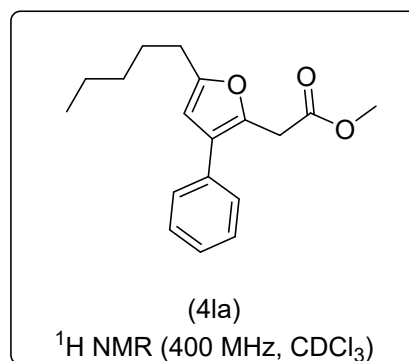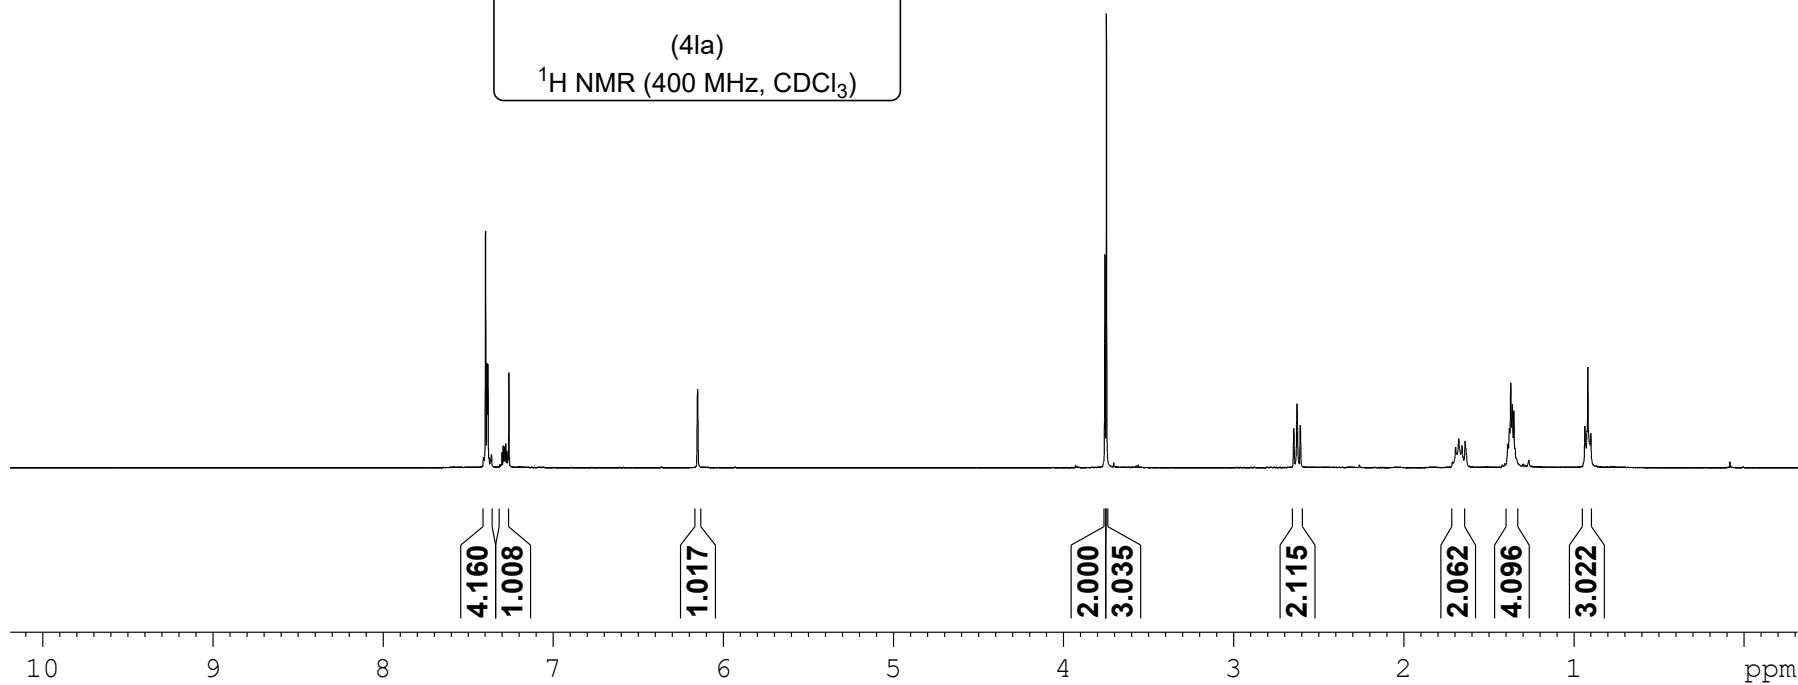

- 170.410
- 155.958
- 141.164
- 133.744
- 128.653
- 127.656
- 126.760
- 124.456
- 106.553
- 77.367
- 77.049
- 76.732
- 52.324
- 33.108
- 31.426
- 27.978
- 27.610
- 22.447
- 14.037

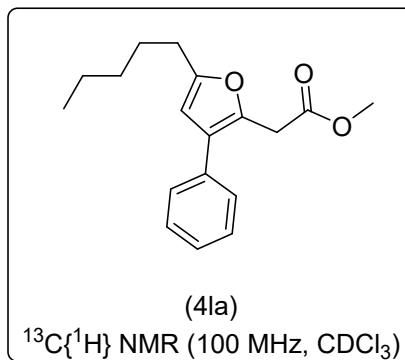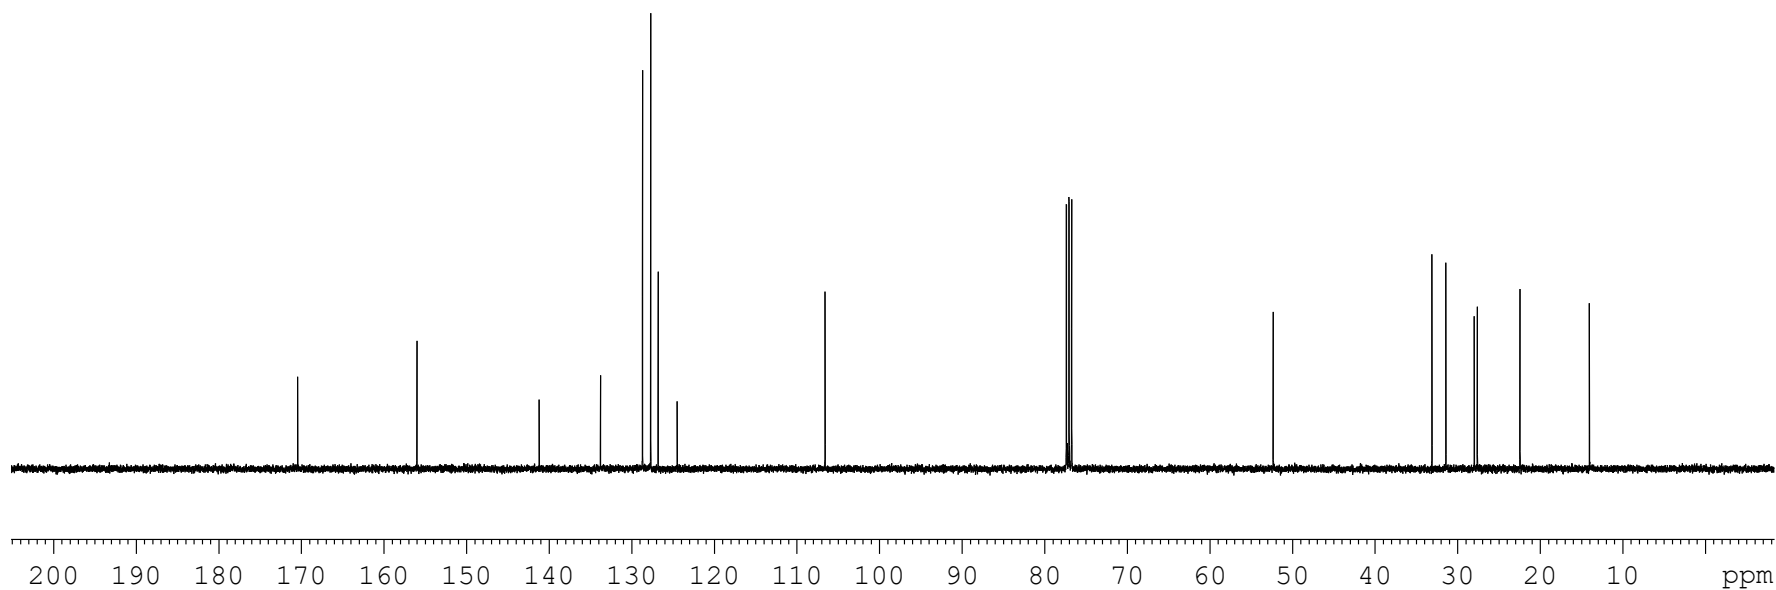

7.413  
7.395  
7.377  
7.322  
7.319  
7.303  
7.297  
7.294  
7.285  
7.277  
7.260

3.716  
3.606

2.248  
1.897

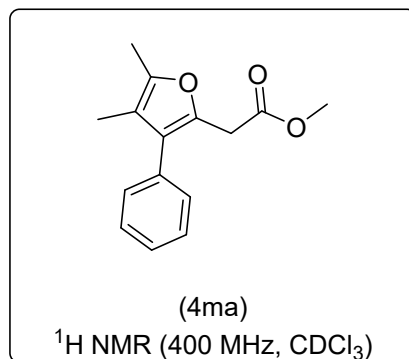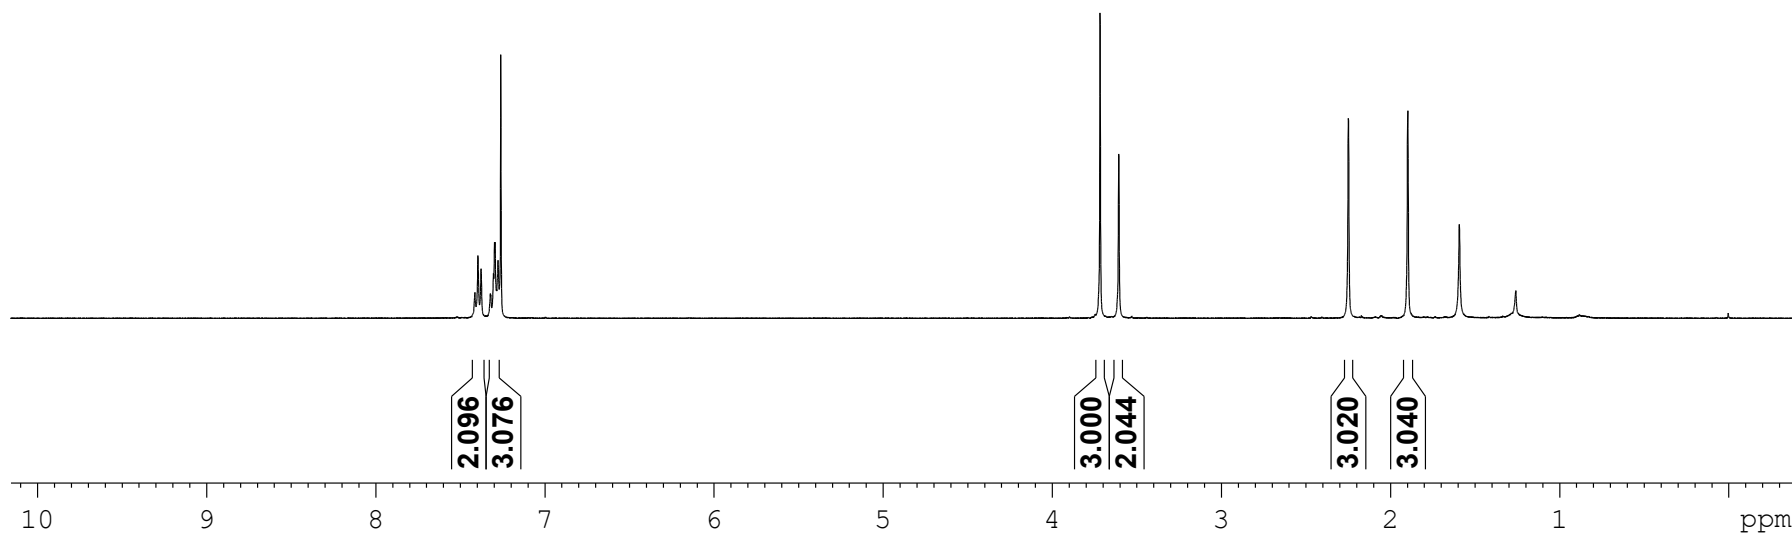

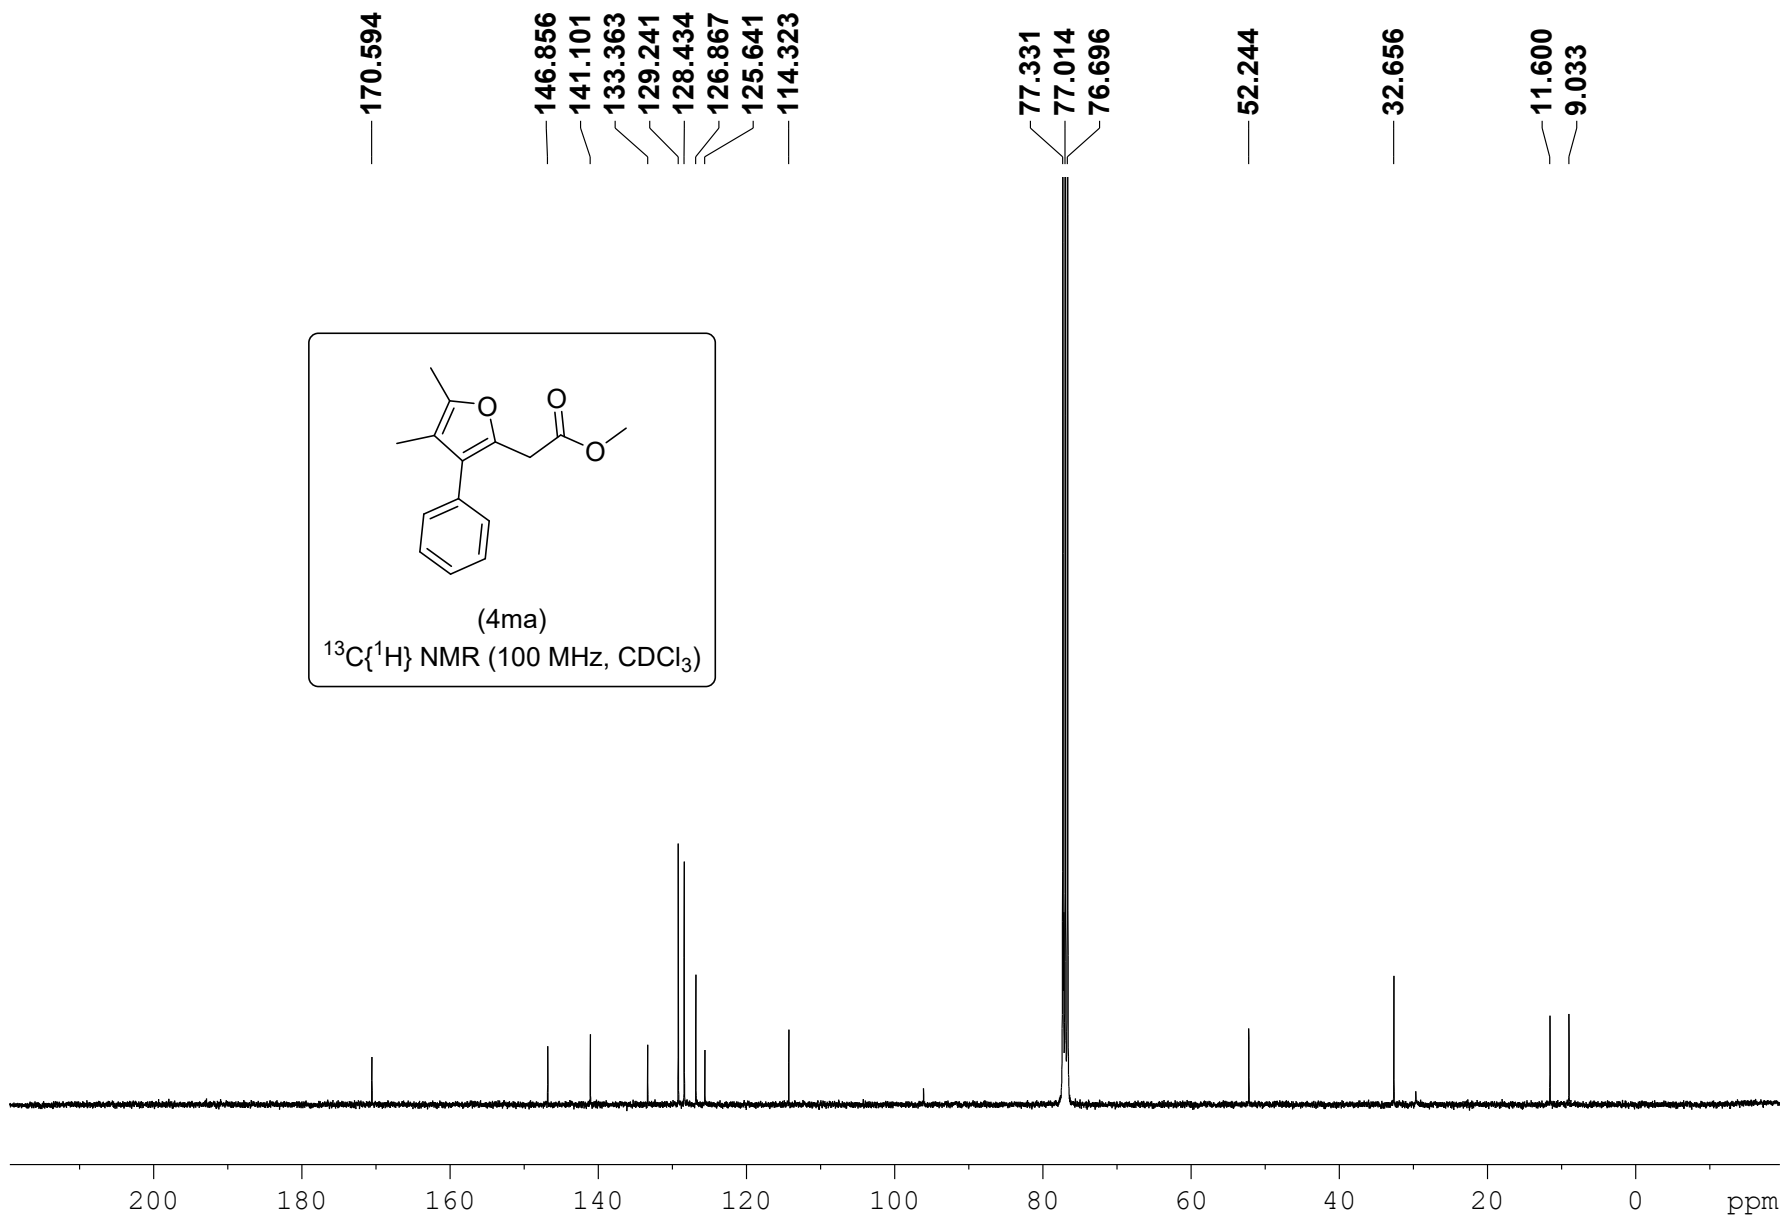

7.392  
7.385  
7.378  
7.357  
7.310  
7.304  
7.298  
7.291  
7.283  
7.276  
7.268  
7.260  
6.142

4.233  
4.215  
4.197  
4.179  
3.727

2.316

1.293  
1.275  
1.257

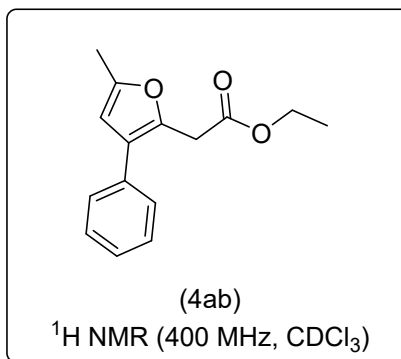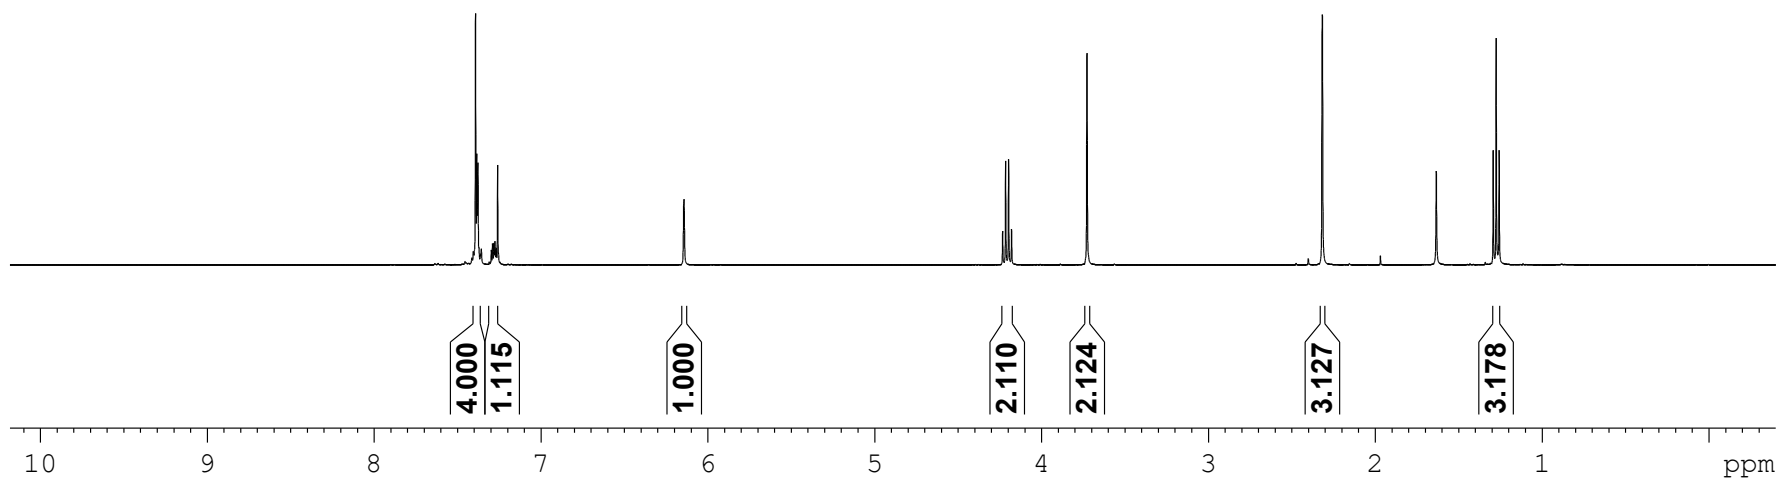

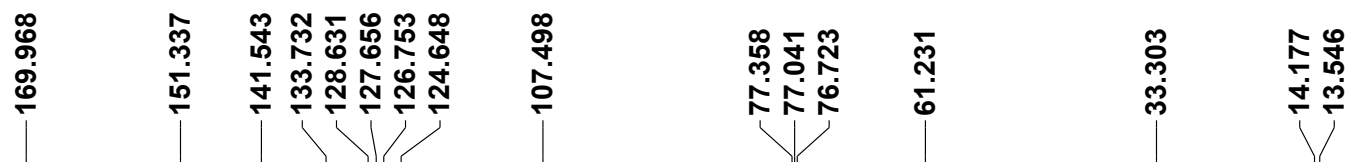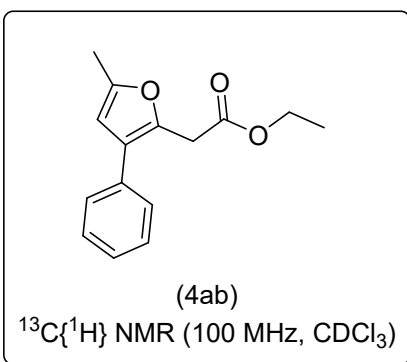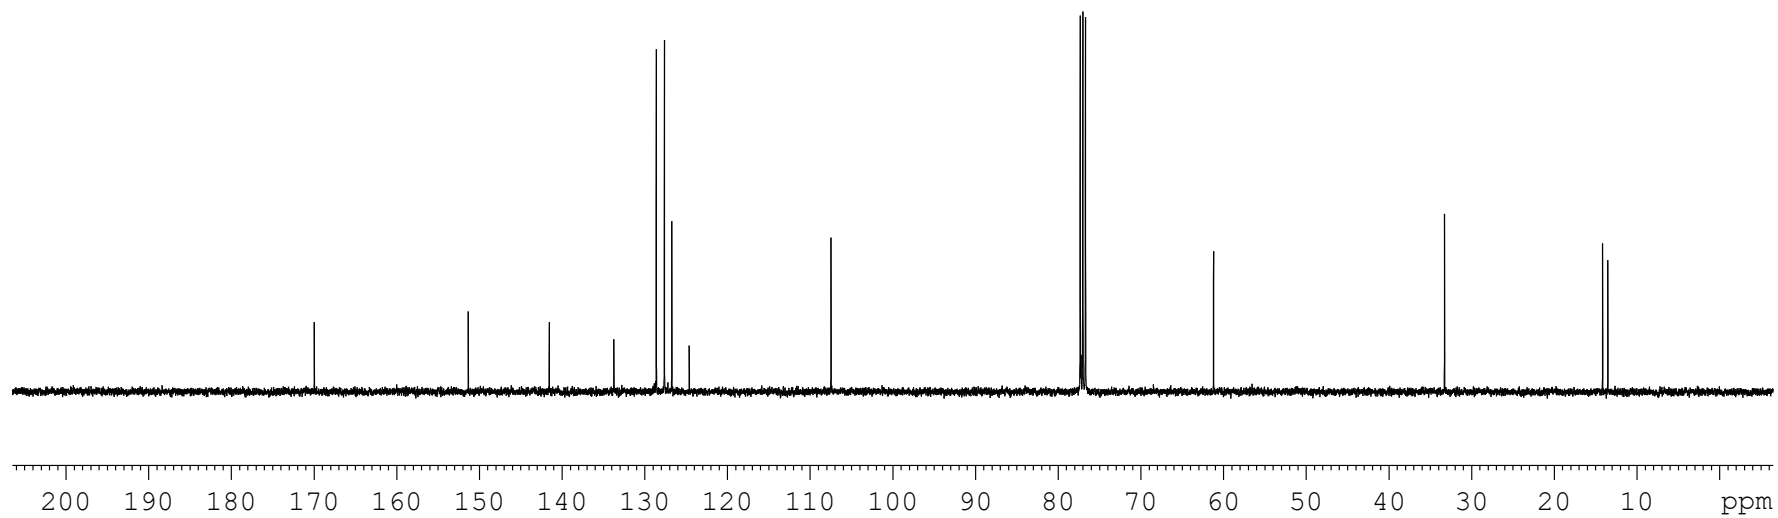

7.407  
7.393  
7.387  
7.377  
7.362  
7.305  
7.297  
7.291  
7.283  
7.276  
7.271  
7.267  
7.260  
6.141

4.170  
4.153  
4.137  
3.730

2.314  
1.658  
1.641  
1.620  
1.604  
1.587  
1.418  
1.399  
1.380  
1.361  
1.343  
1.325  
0.943  
0.925  
0.906

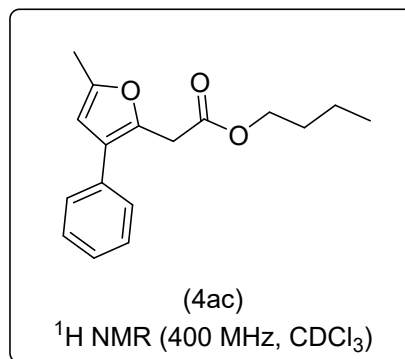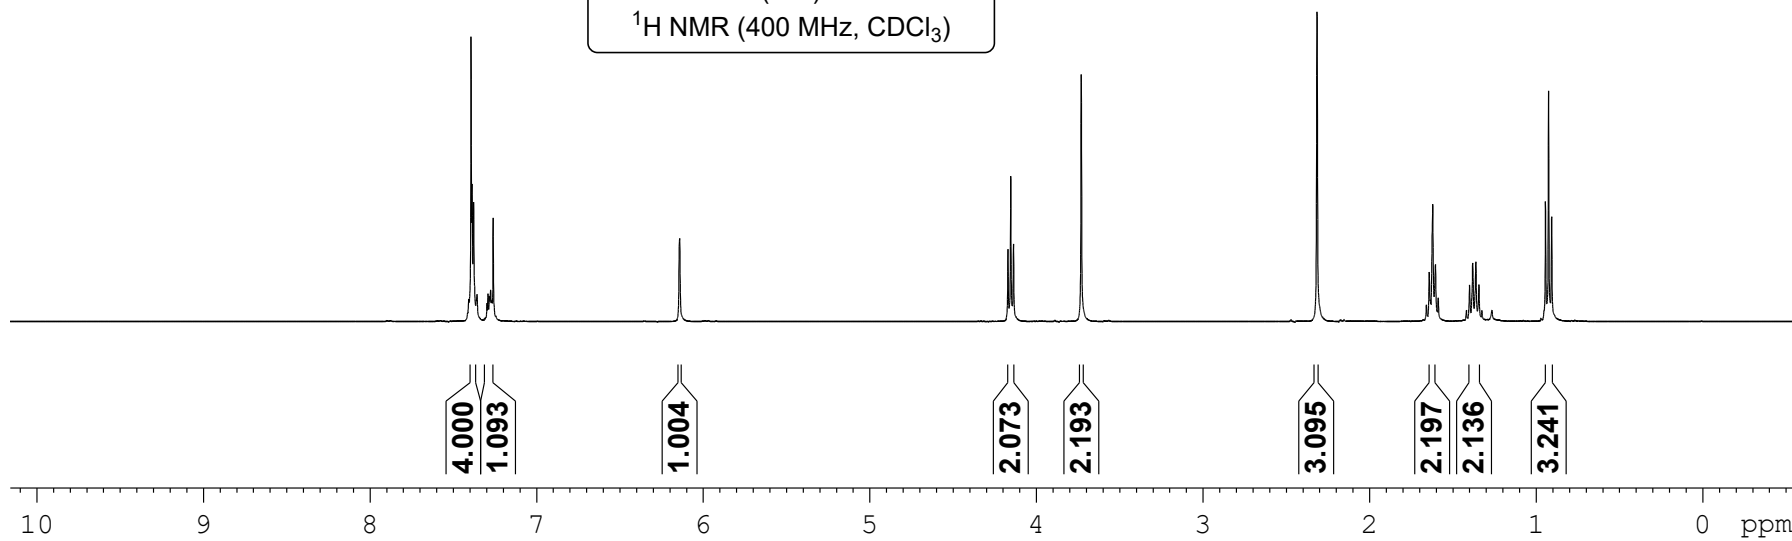



— 170.006  
— 151.288  
— 141.593  
— 133.757  
— 128.616  
— 127.653  
— 126.731  
— 124.588  
— 107.471  
  
77.349  
77.031  
76.714  
65.075  
  
33.326  
30.584  
19.051  
13.664  
13.507

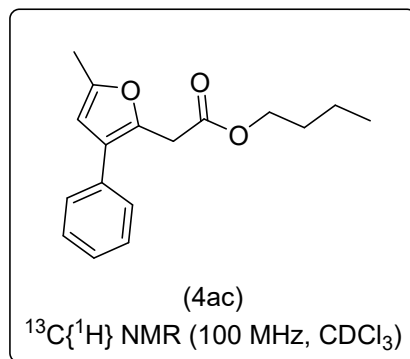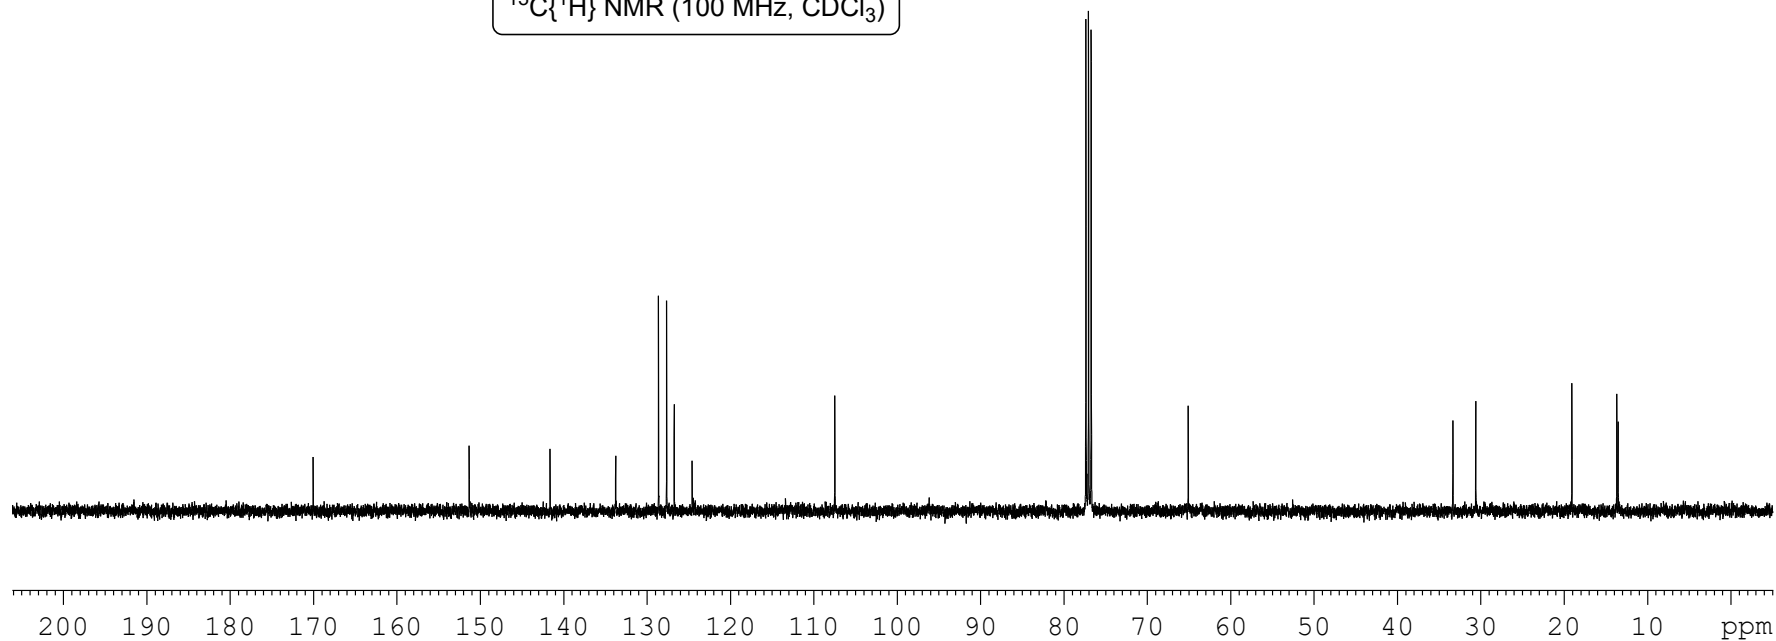

7.389  
7.383  
7.374  
7.369  
7.355  
7.342  
7.338  
7.329  
7.296  
7.290  
7.283  
7.274  
7.260  
6.154

5.204

3.797

2.324

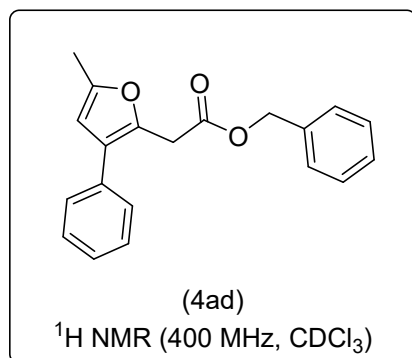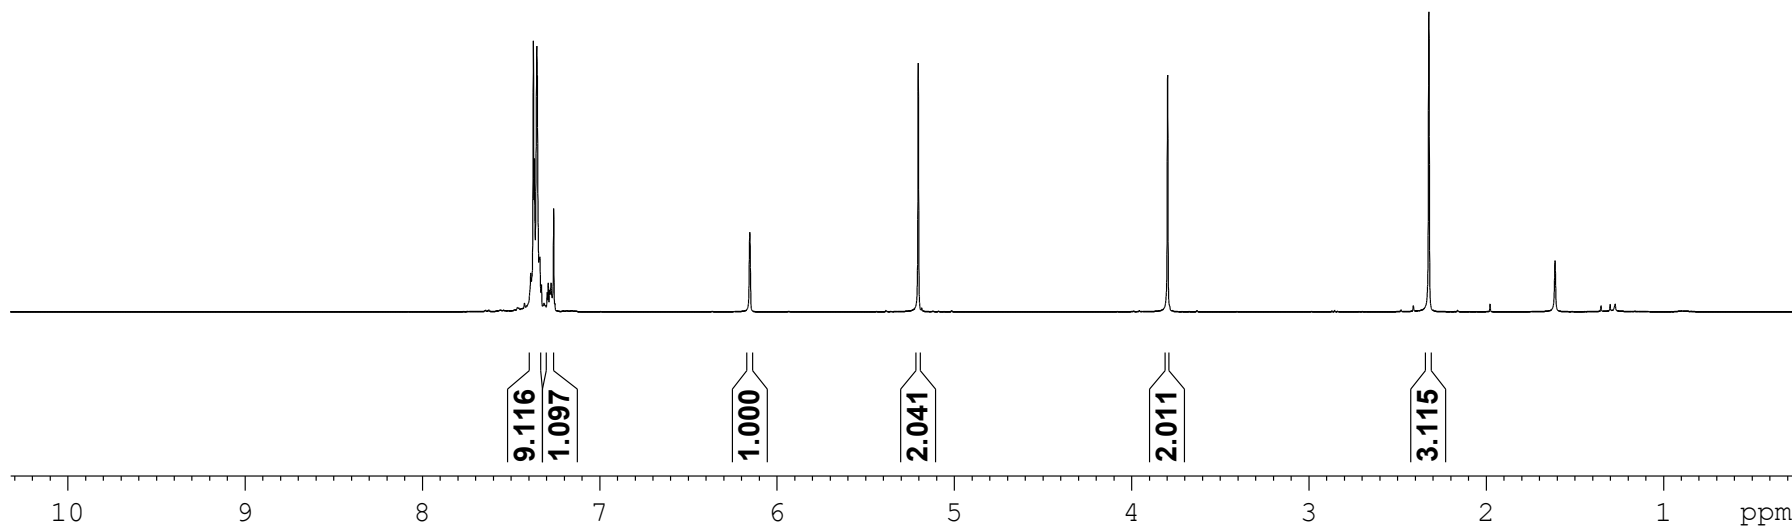

169.768  
 151.426  
 141.290  
 135.753  
 133.658  
 128.654  
 128.559  
 128.256  
 128.104  
 127.678  
 126.793  
 124.809  
 107.553

77.372  
 77.054  
 76.737  
 66.869

33.274

13.552

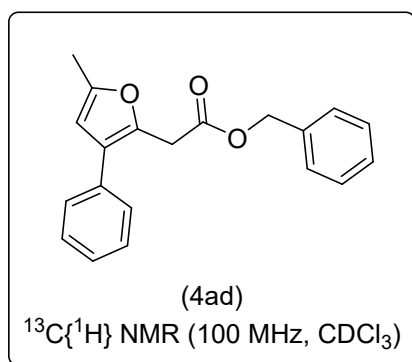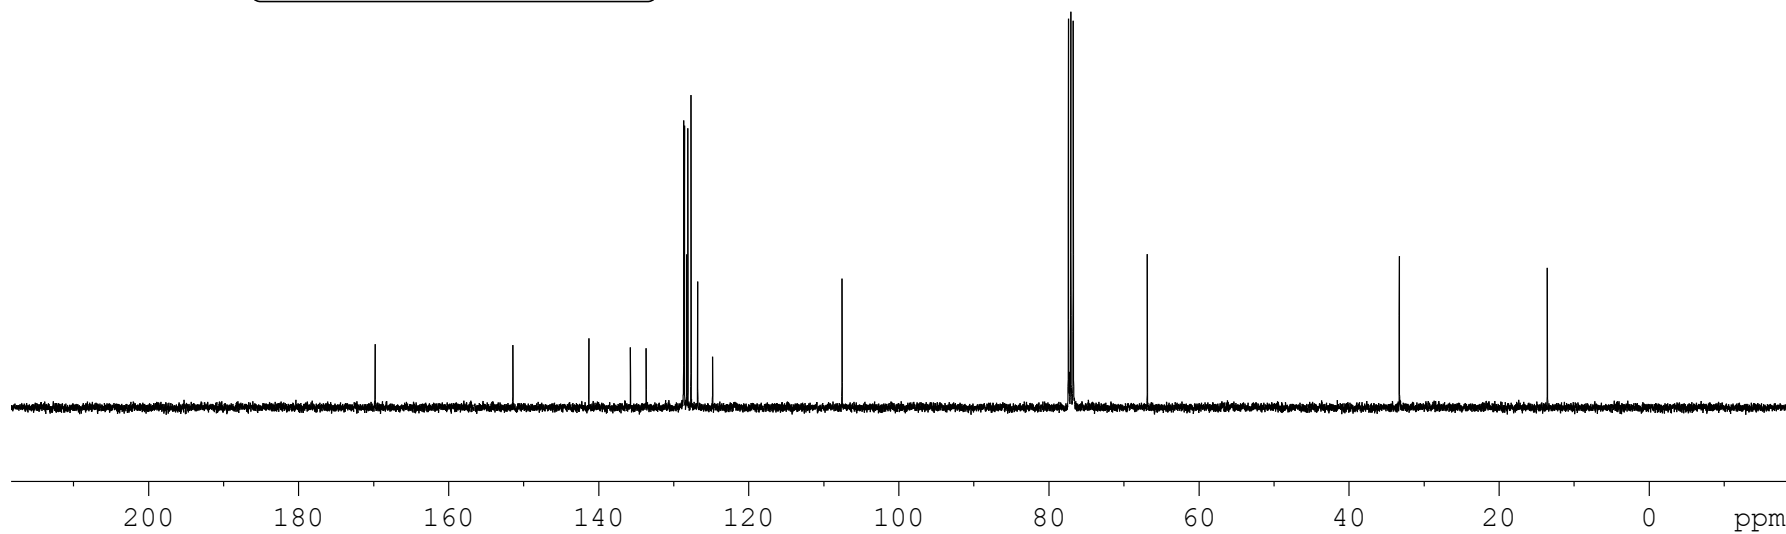

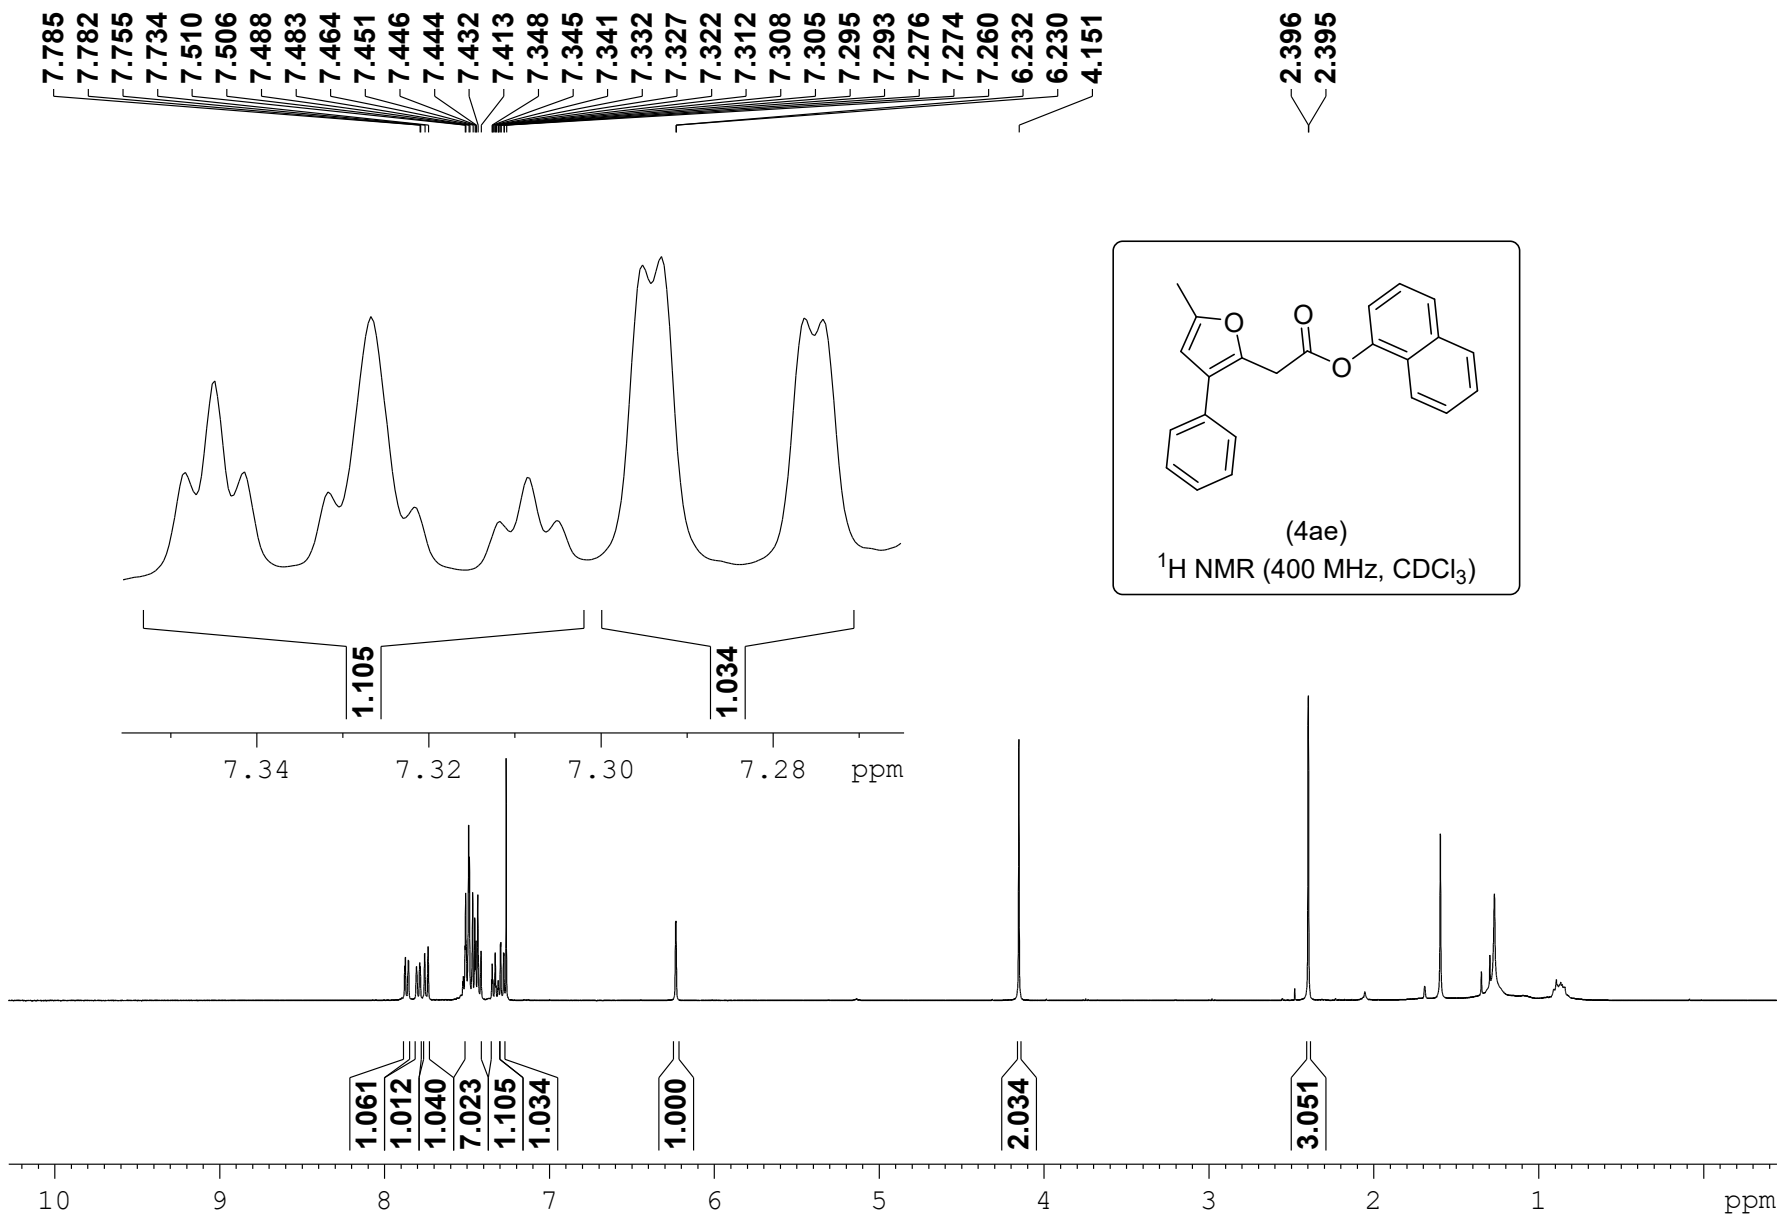

168.344  
151.718  
146.561  
140.880  
134.635  
133.600  
128.812  
127.967  
127.802  
127.007  
126.685  
126.479  
126.459  
126.140  
125.347  
125.222  
121.177  
118.037  
107.802

77.364  
77.046  
76.728

33.563

13.610

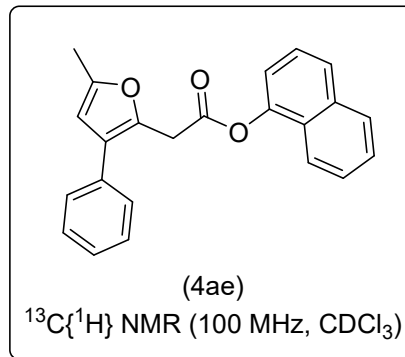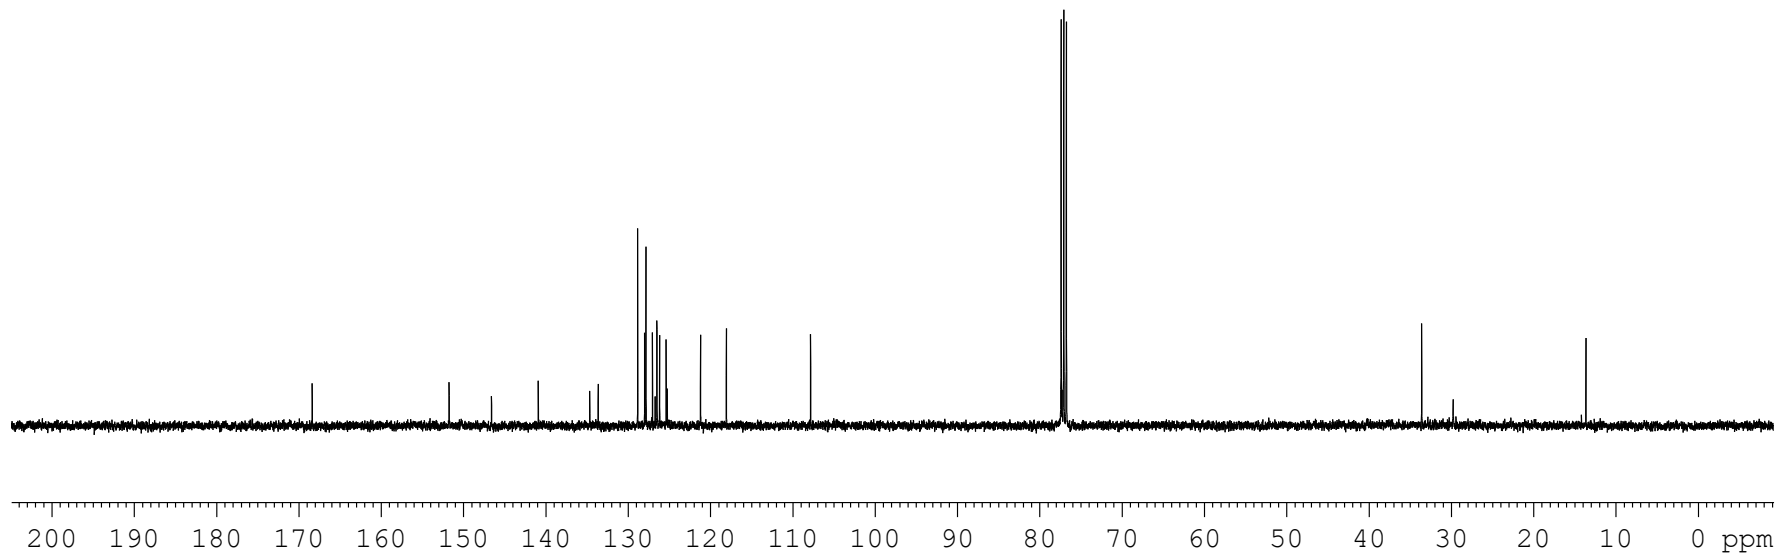

7.528  
7.489  
7.442  
7.432  
7.429  
7.420  
7.415  
7.260  
7.157  
7.147  
7.139  
7.134  
6.404  
5.725  
5.686

3.736

1.818

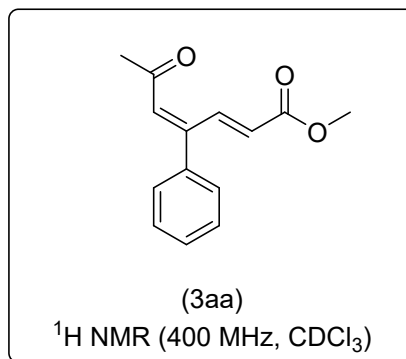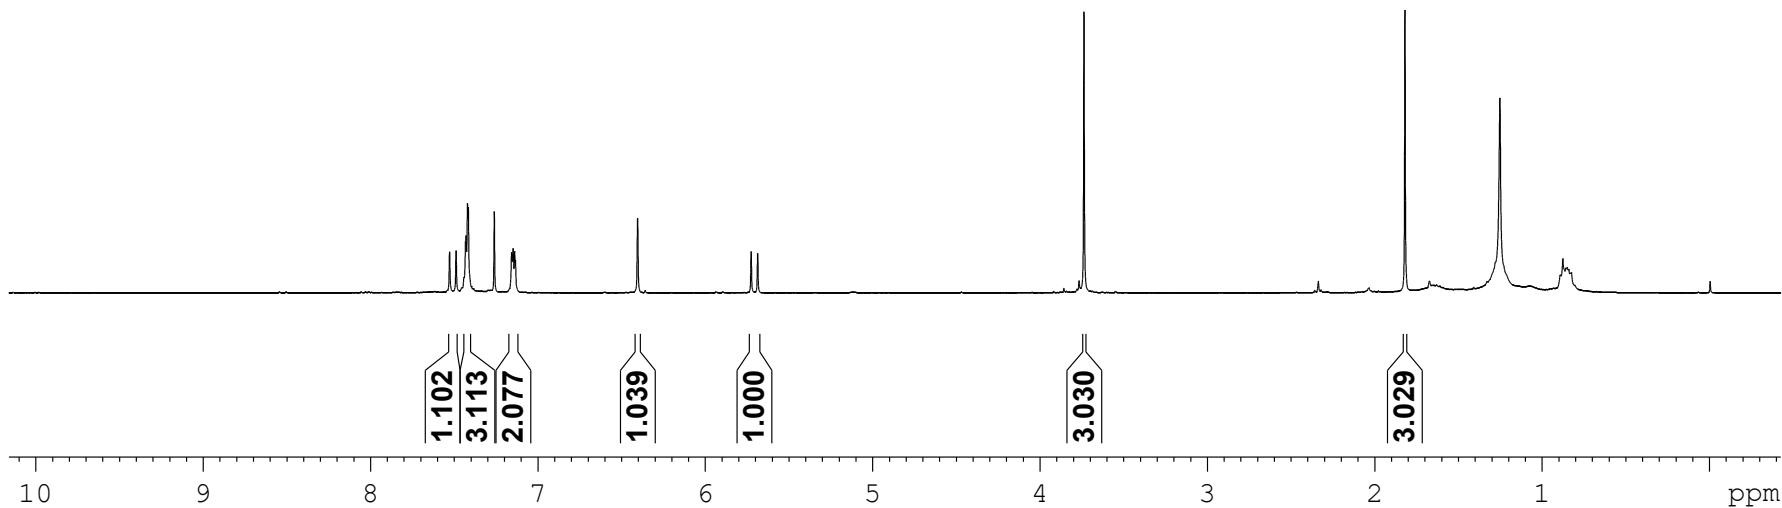

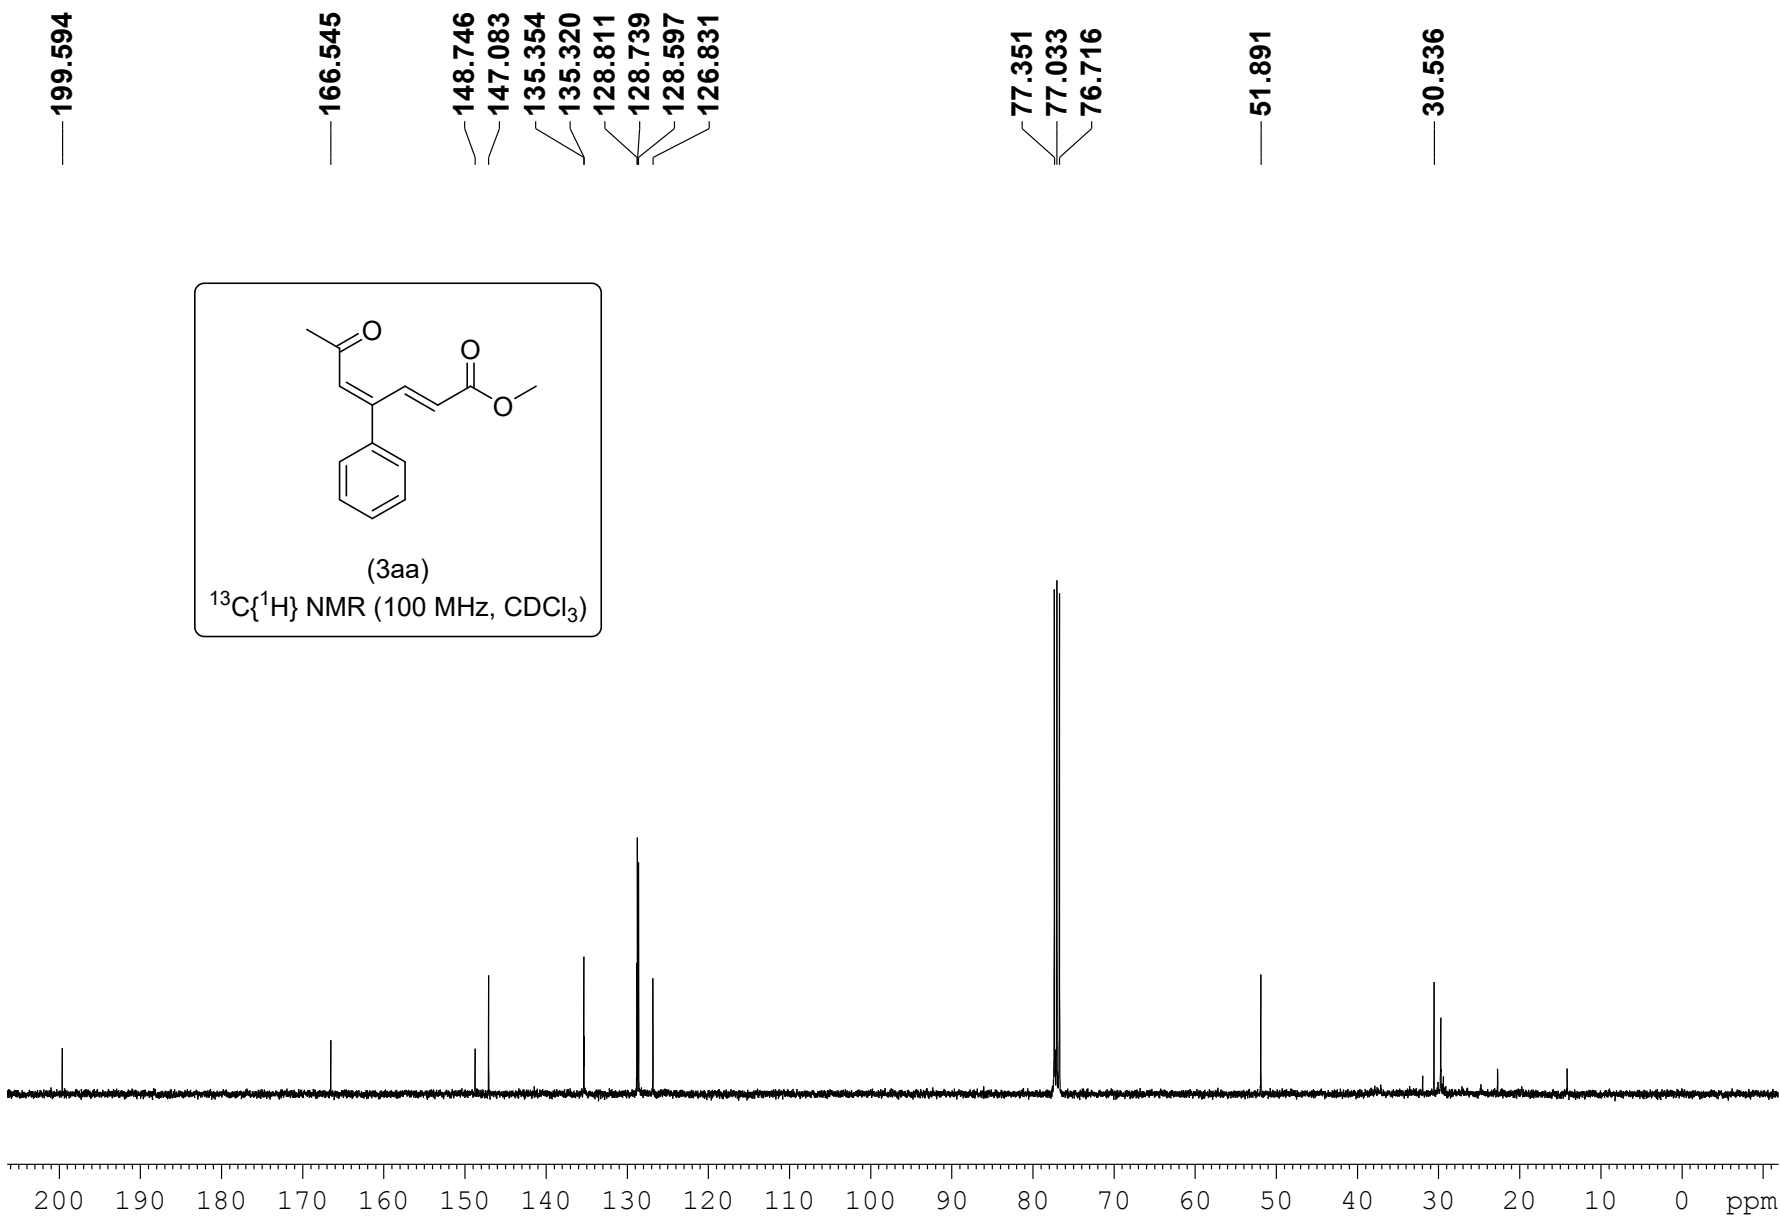

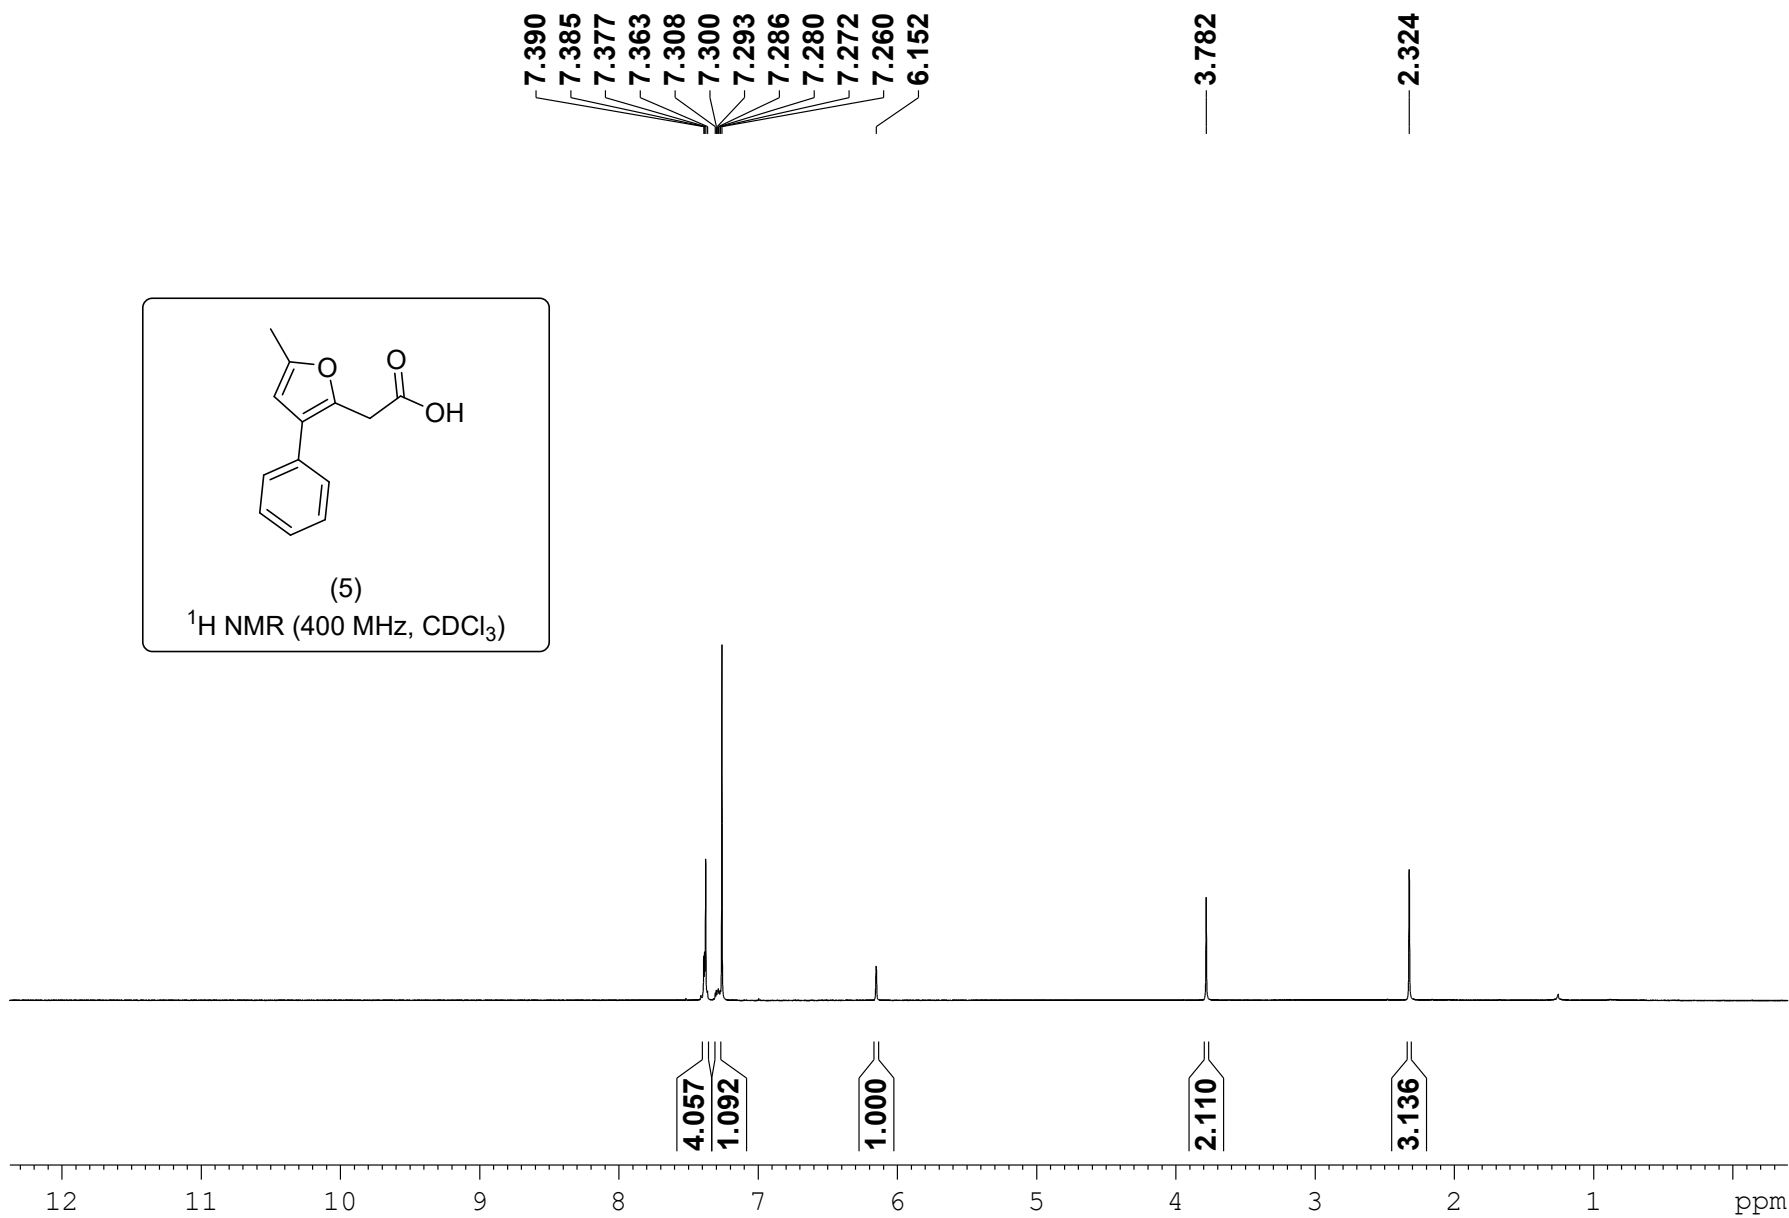



— 176.303  
 — 151.698  
 — 140.618  
 — 133.484  
 — 128.732  
 — 127.684  
 — 126.946  
 — 125.209

— 107.609

77.362  
 77.044  
 76.727

— 32.933

— 13.551

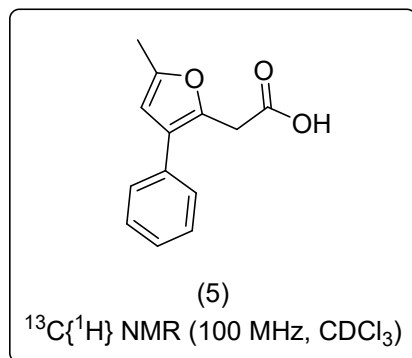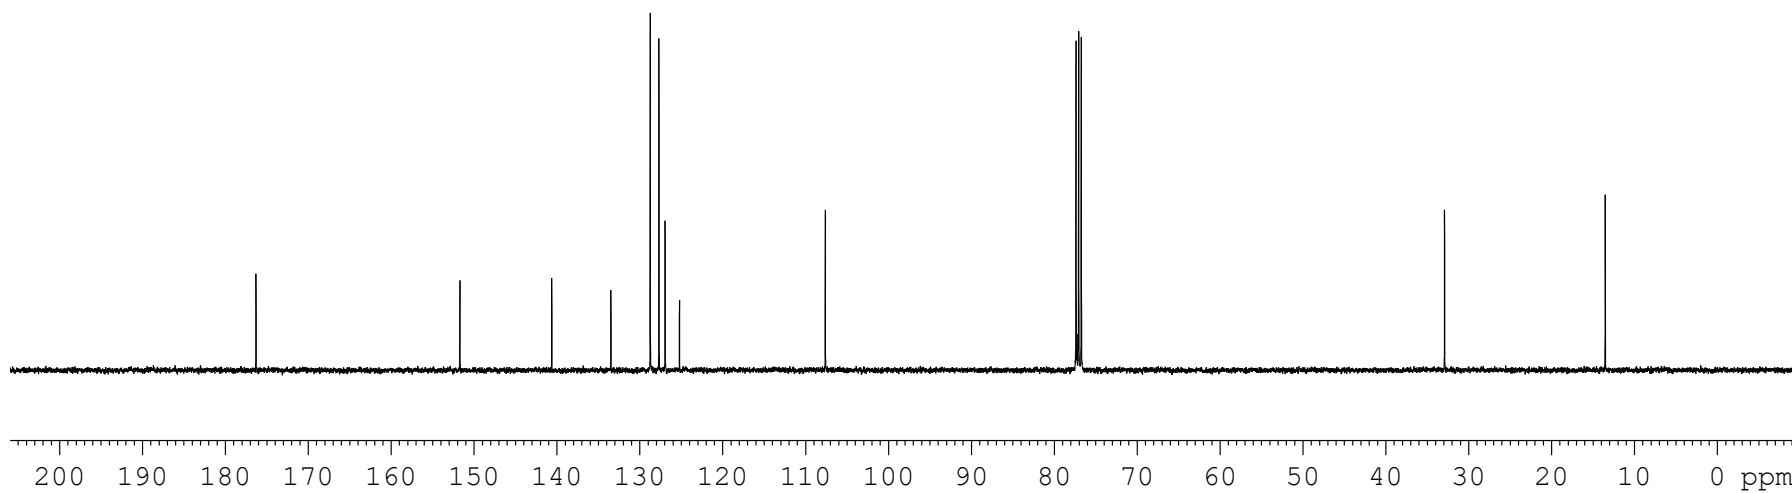

7.405  
7.399  
7.390  
7.384  
7.373  
7.368  
7.358  
7.353  
7.285  
7.279  
7.272  
7.270  
7.268  
7.260  
7.256  
7.247  
7.241  
6.121  
6.119

3.952  
3.936  
3.921  
3.035  
3.020  
3.004  
2.312  
2.311  
1.738

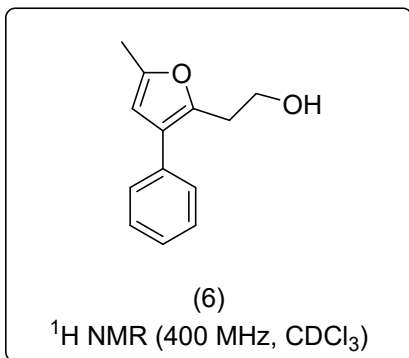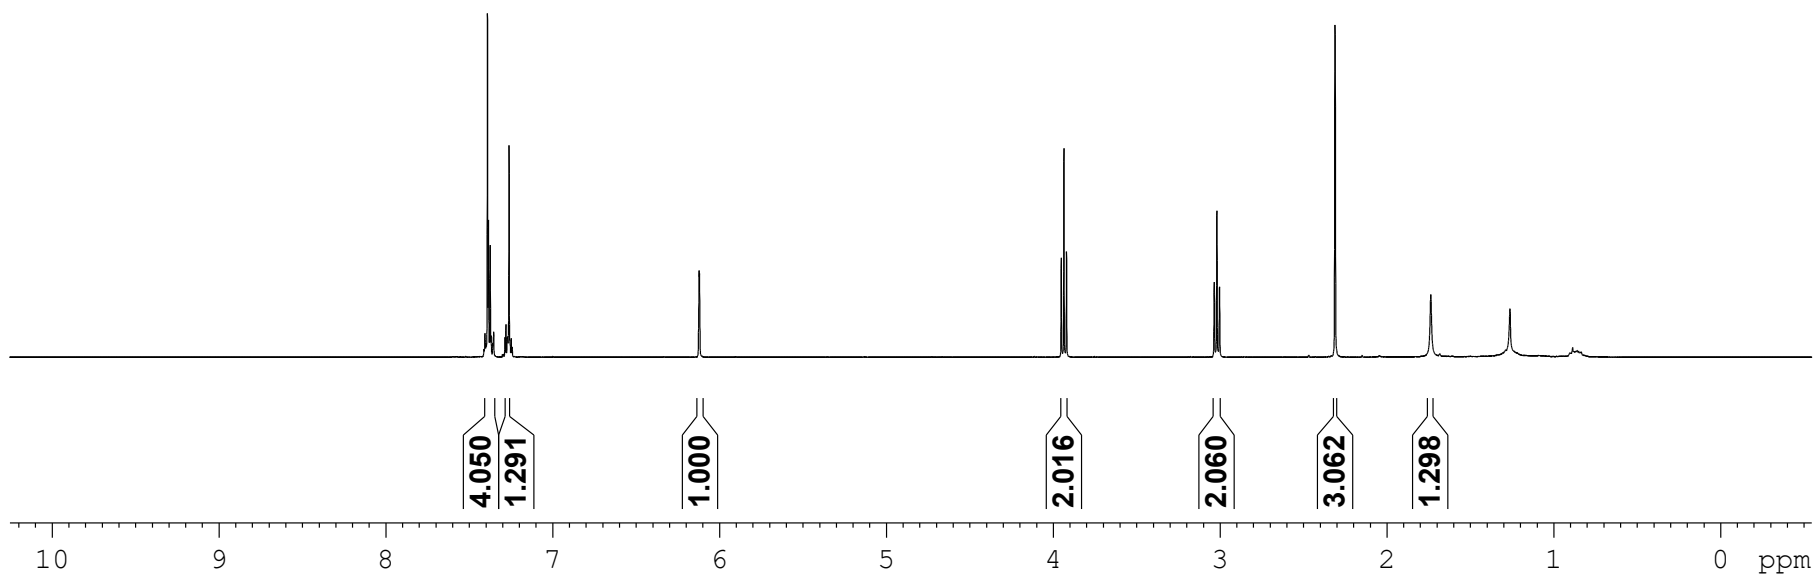

150.702  
 146.441  
 134.047  
 128.594  
 127.705  
 126.528  
 123.561  
 107.437  
 77.358  
 77.040  
 76.723  
 61.535  
 30.393  
 13.528

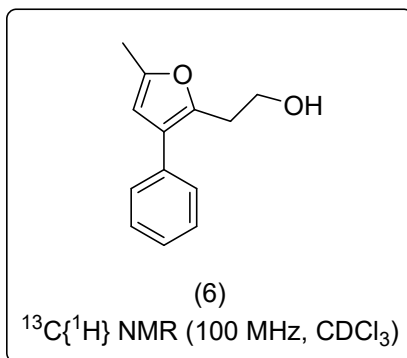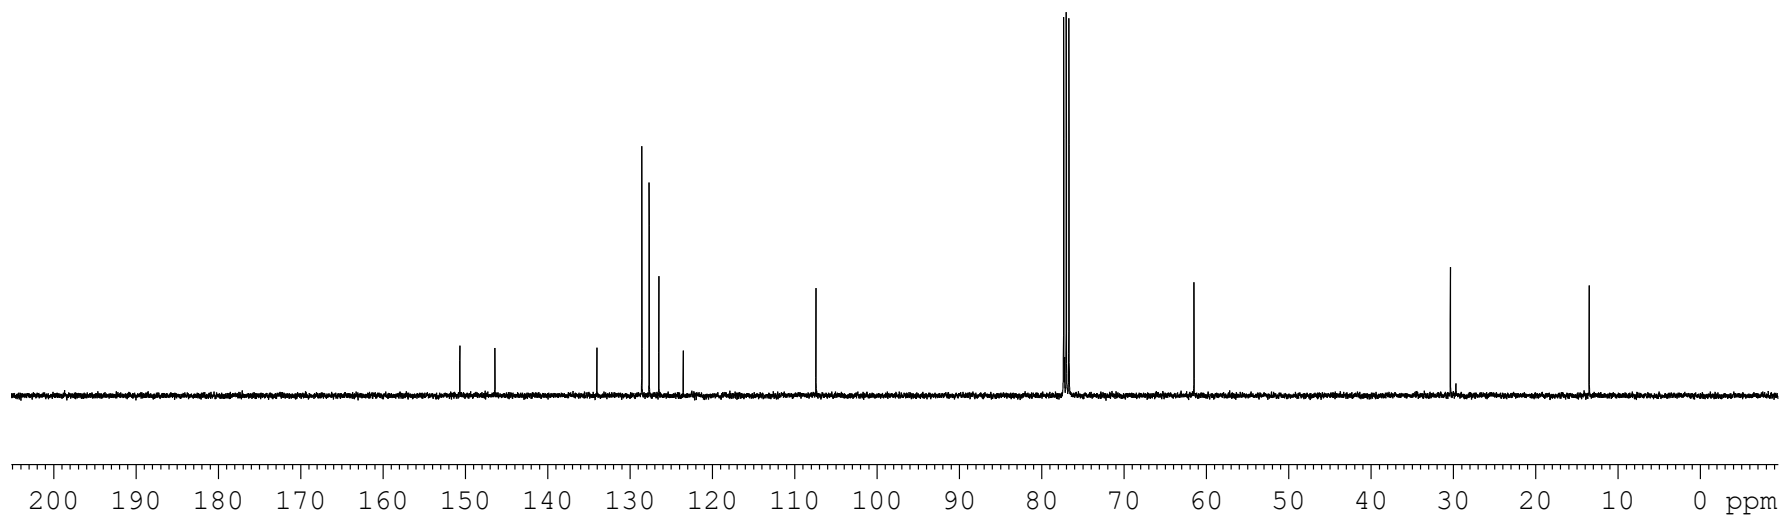

Supplement: d1ob01293b1.pdf [file d1ob01293b1.pdf]
