# Supplementary material for: Rhodium(iii)-catalyzed synthesis of trisubstituted furans via vinylic C–H bond activation
Source: Royal Society of Chemistry journal article supplement (doi:10.1039/d1ob01293b), 2021-01-01

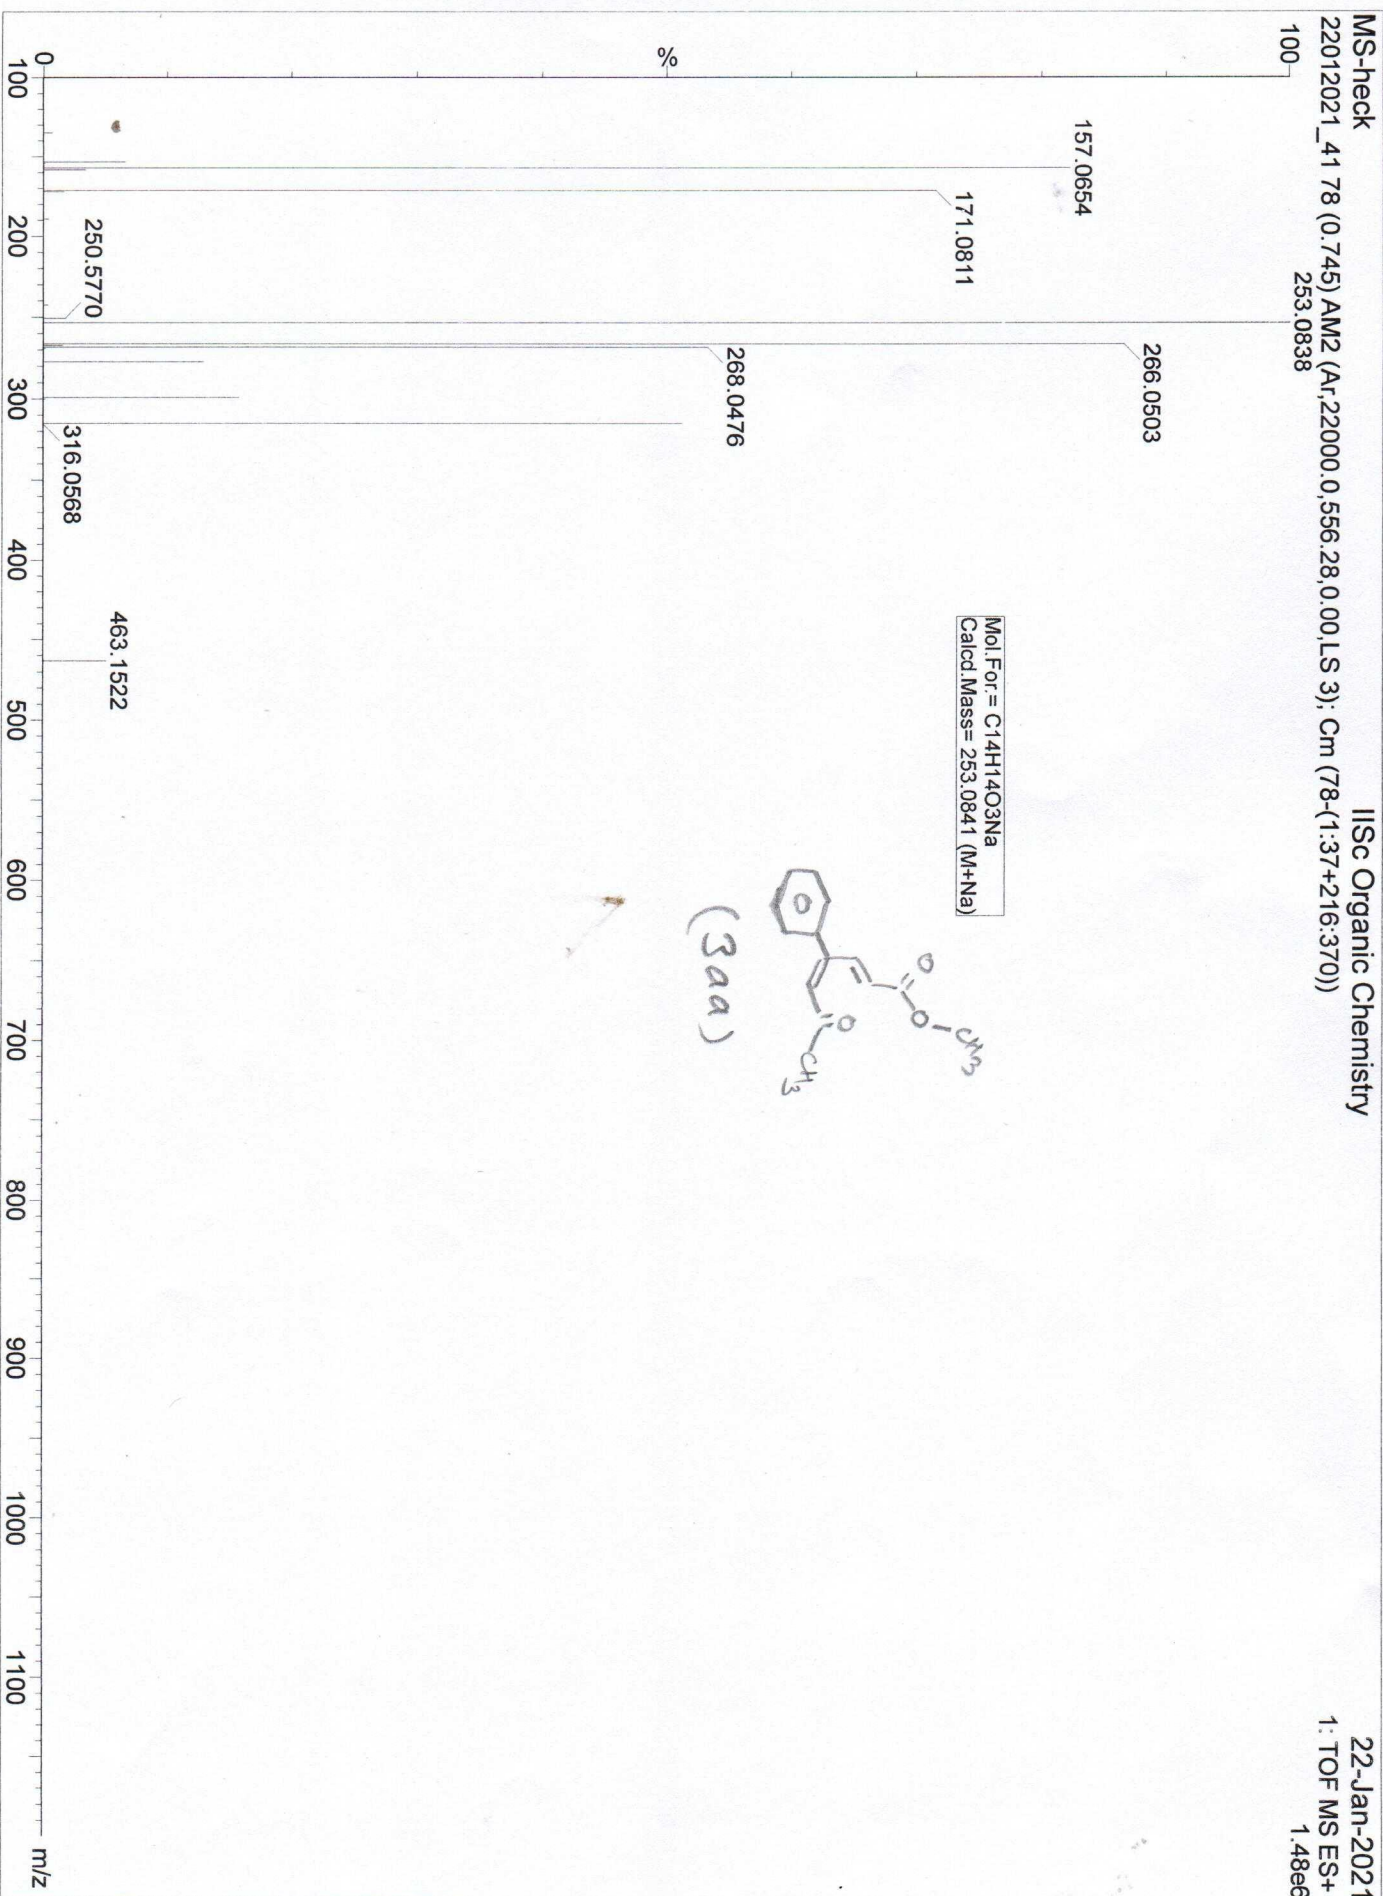

MS-Furan

IISc Organic Chemistry

15012021\_27 71 (0.665) AM2 (Ar,22000, 0,556,28,0,00,LS 3); Cm (71-(1:35+145:436))

15-Jan-2021  
1: TOF MS ES+  
1.70e6

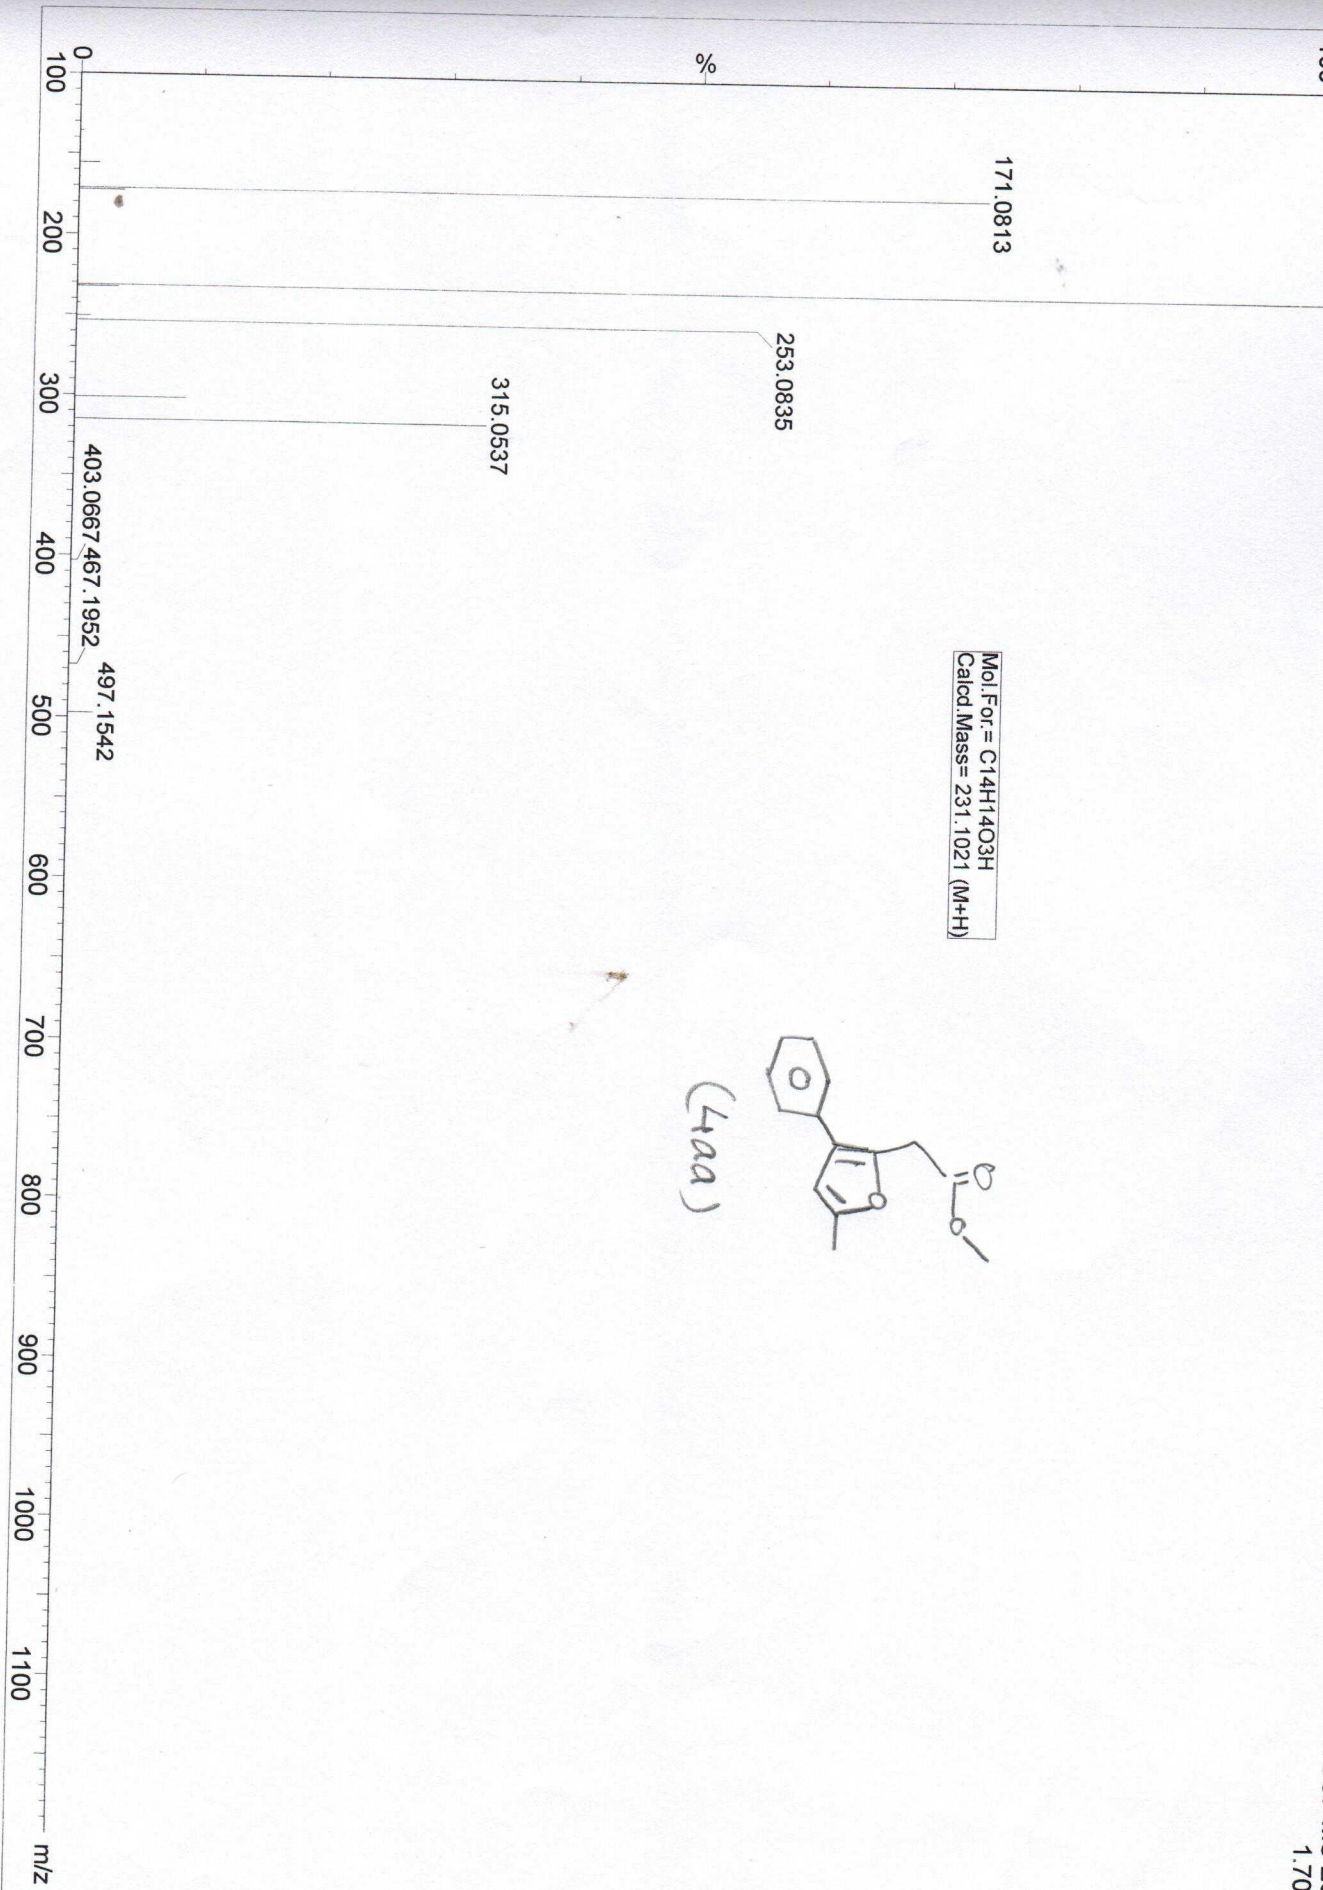

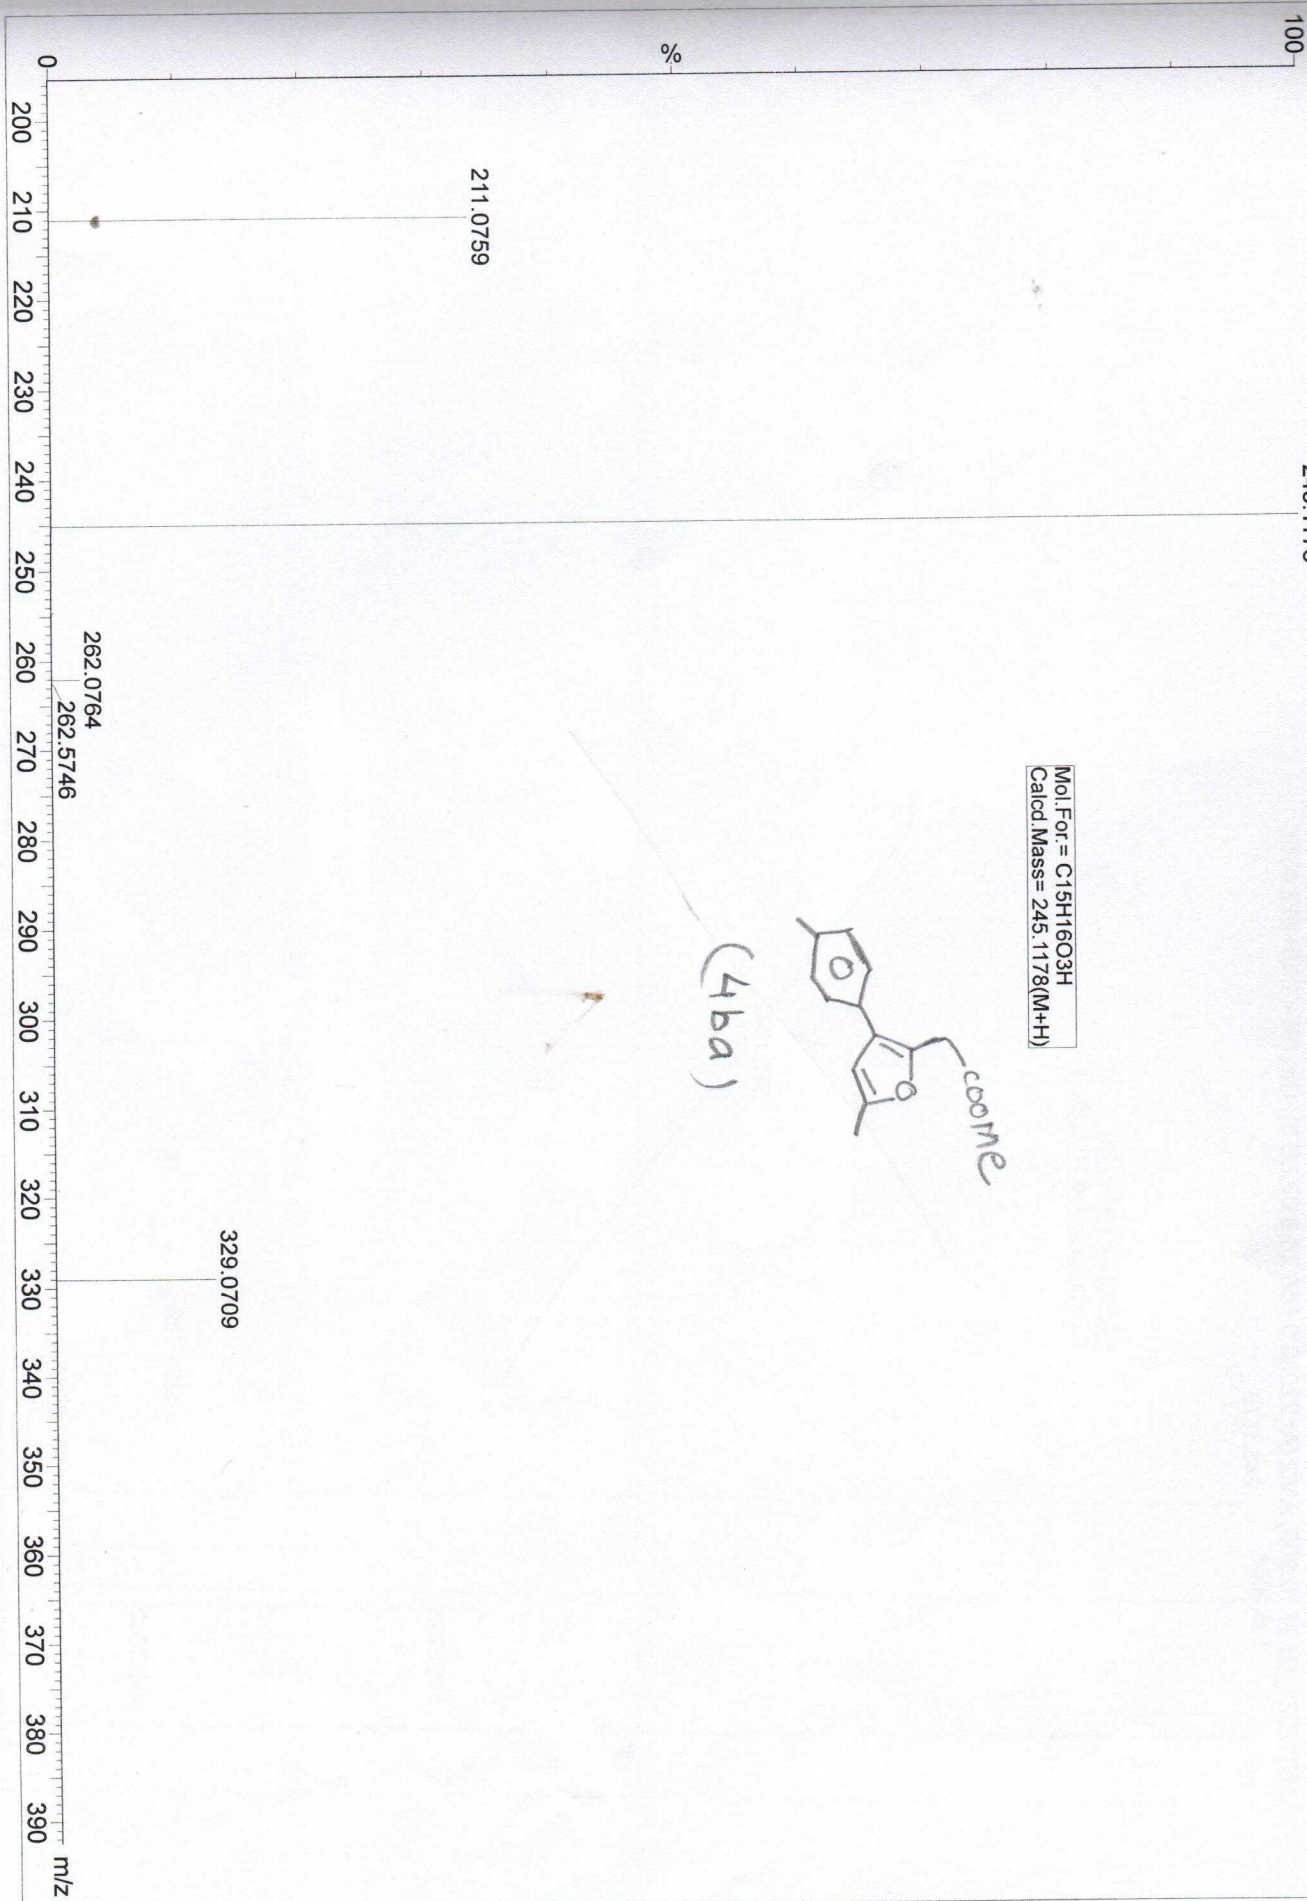

Mol. Formula: C<sub>16</sub>H<sub>18</sub>O<sub>3</sub>H  
Calcd. Mass=259.1334(M+H)

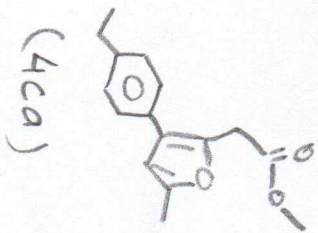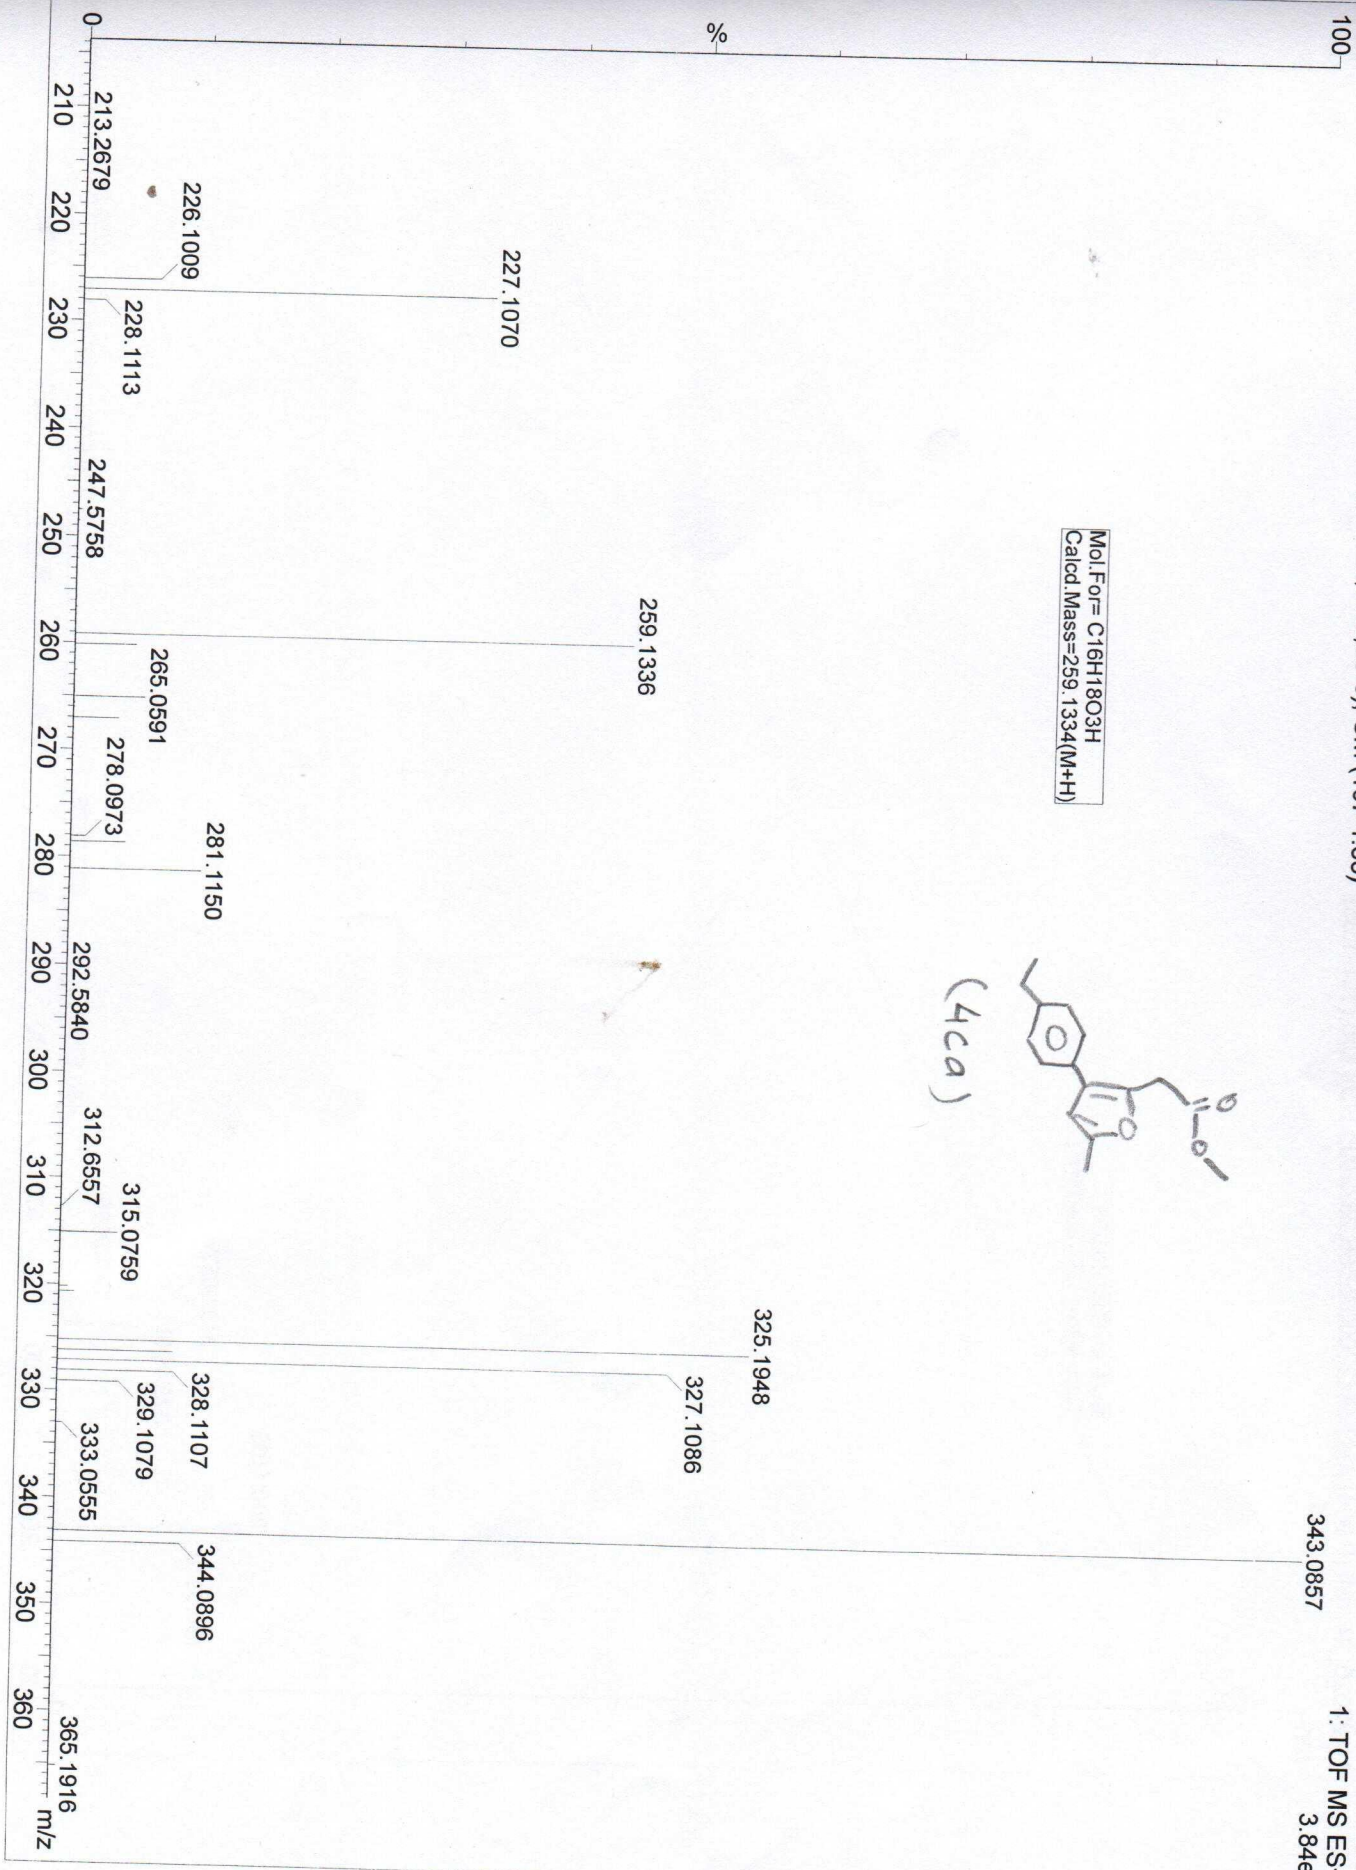

MS-04-055-P-1

IISc Organic Chemistry

05112020\_29 75 (0.719) AM2 (Ar:22000,0,556;28,0,00,LS 3); Cm (75-249;327)

05-Nov-2020  
1: TOF MS ES+  
1.18e5

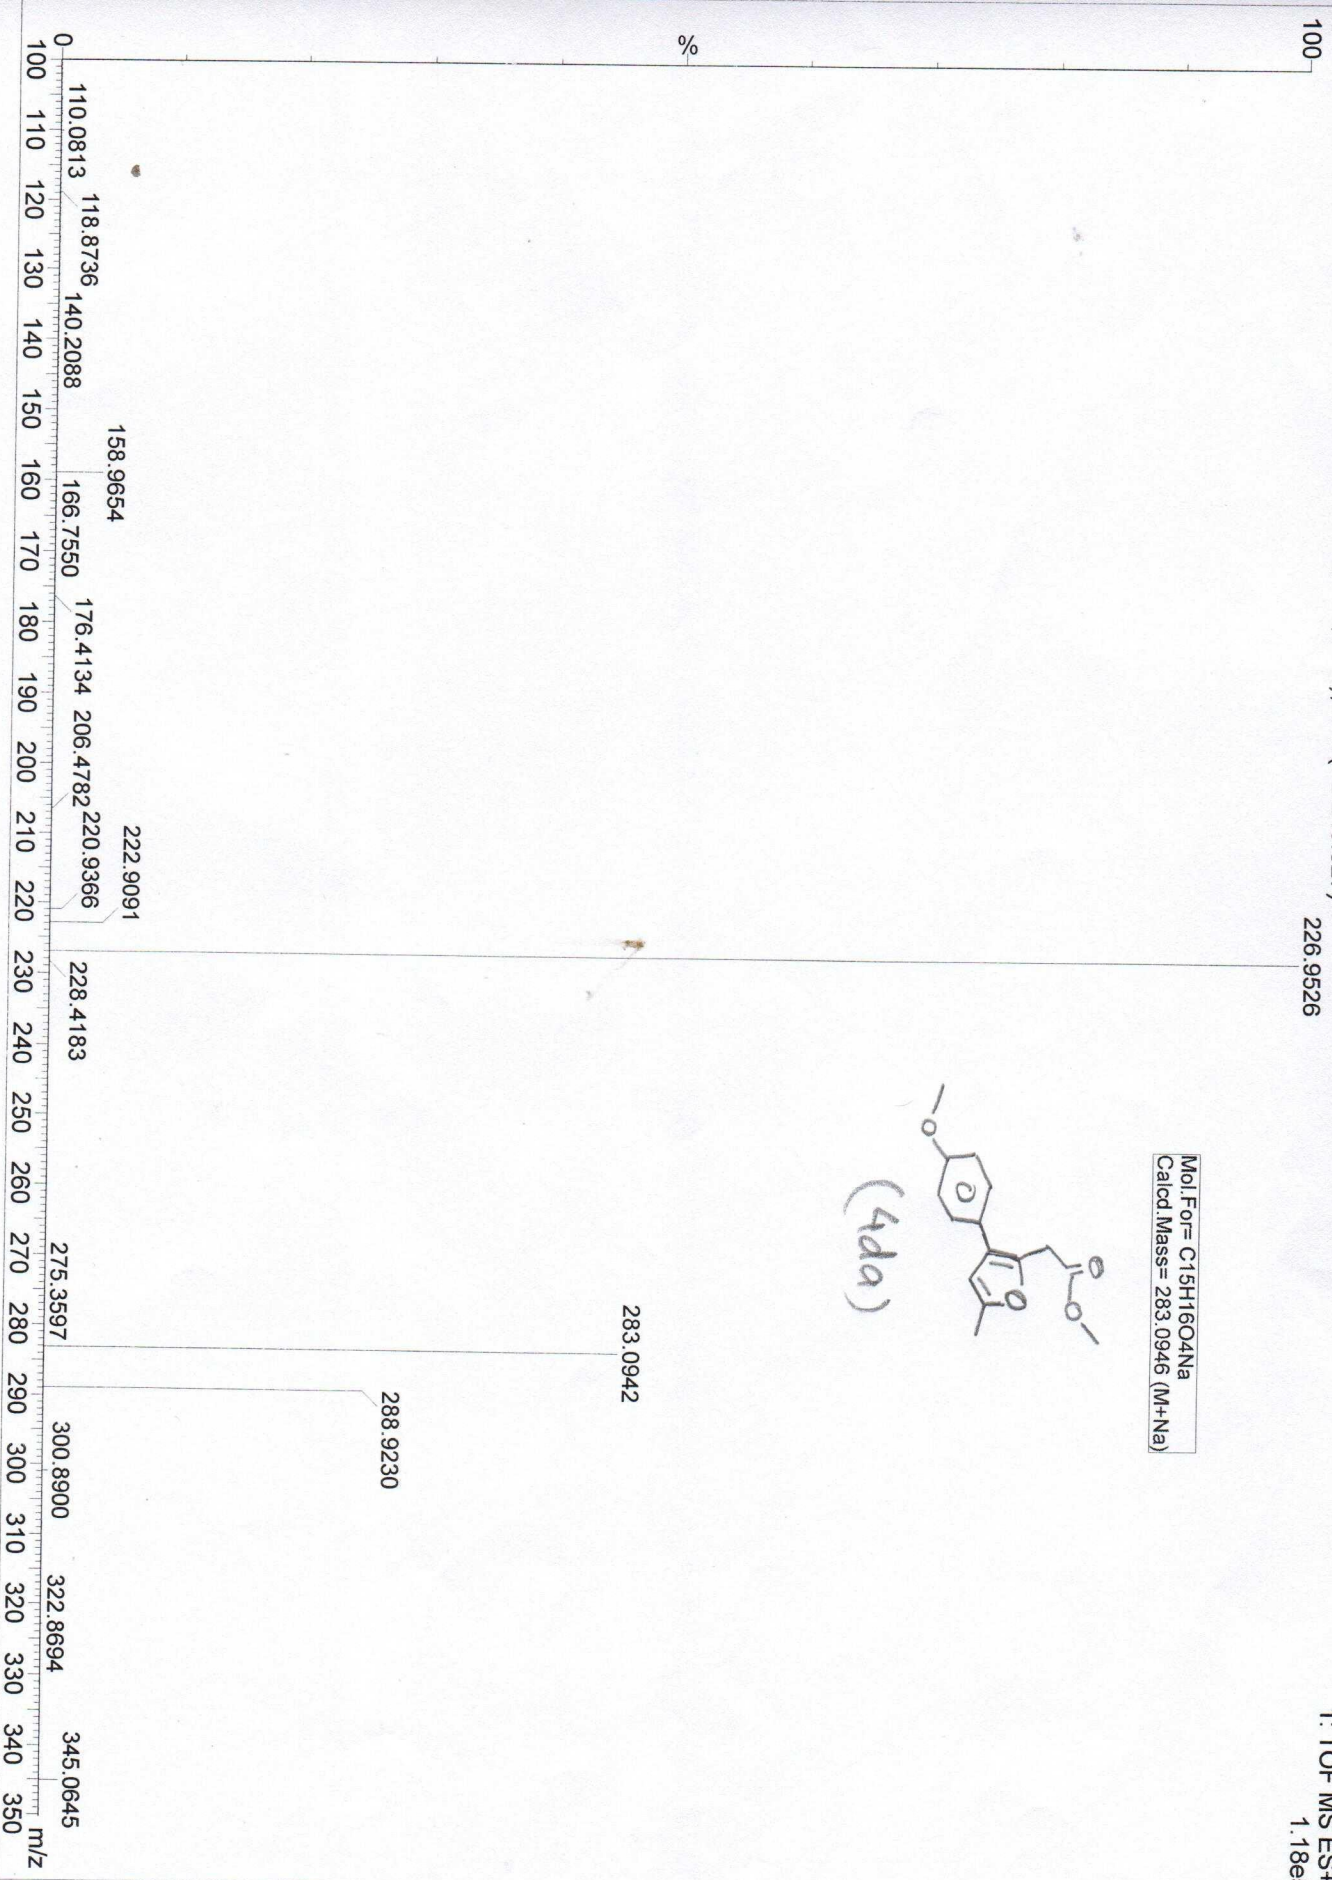

Mol. For = C<sub>15</sub>H<sub>16</sub>O<sub>4</sub>Na  
Calcd. Mass = 283.0946 (M+Na)

MS-04-112

IISc Organic Chemistry

19012021\_04 144 (1.331) AM2 (Ar, 22000.0, 556.28, 0.00, LS 3); Cm (144-(1.73+240.435))

309.0124

19-Jan-2021  
1: TOF MS ES+  
2.24e5

Mol. For = C<sub>14</sub>H<sub>13</sub>BrO<sub>3</sub>H  
Calcd. Mass = 309.0126 (M+H)

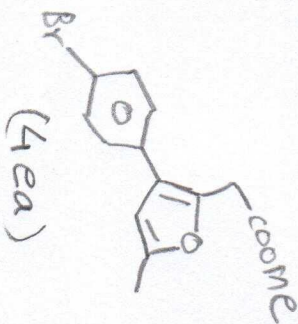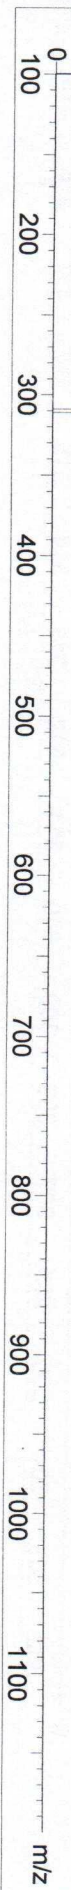

MS-04-056

19012021\_06 103 (0.959) AM2 (Ar,22000,0.556,28,0.00,LS 3); Cm (103-(4:37+341:412))

IISc Organic Chemistry

263.0499 265.0613

19-Jan-2021  
1: TOF MS ES+  
1.07e5

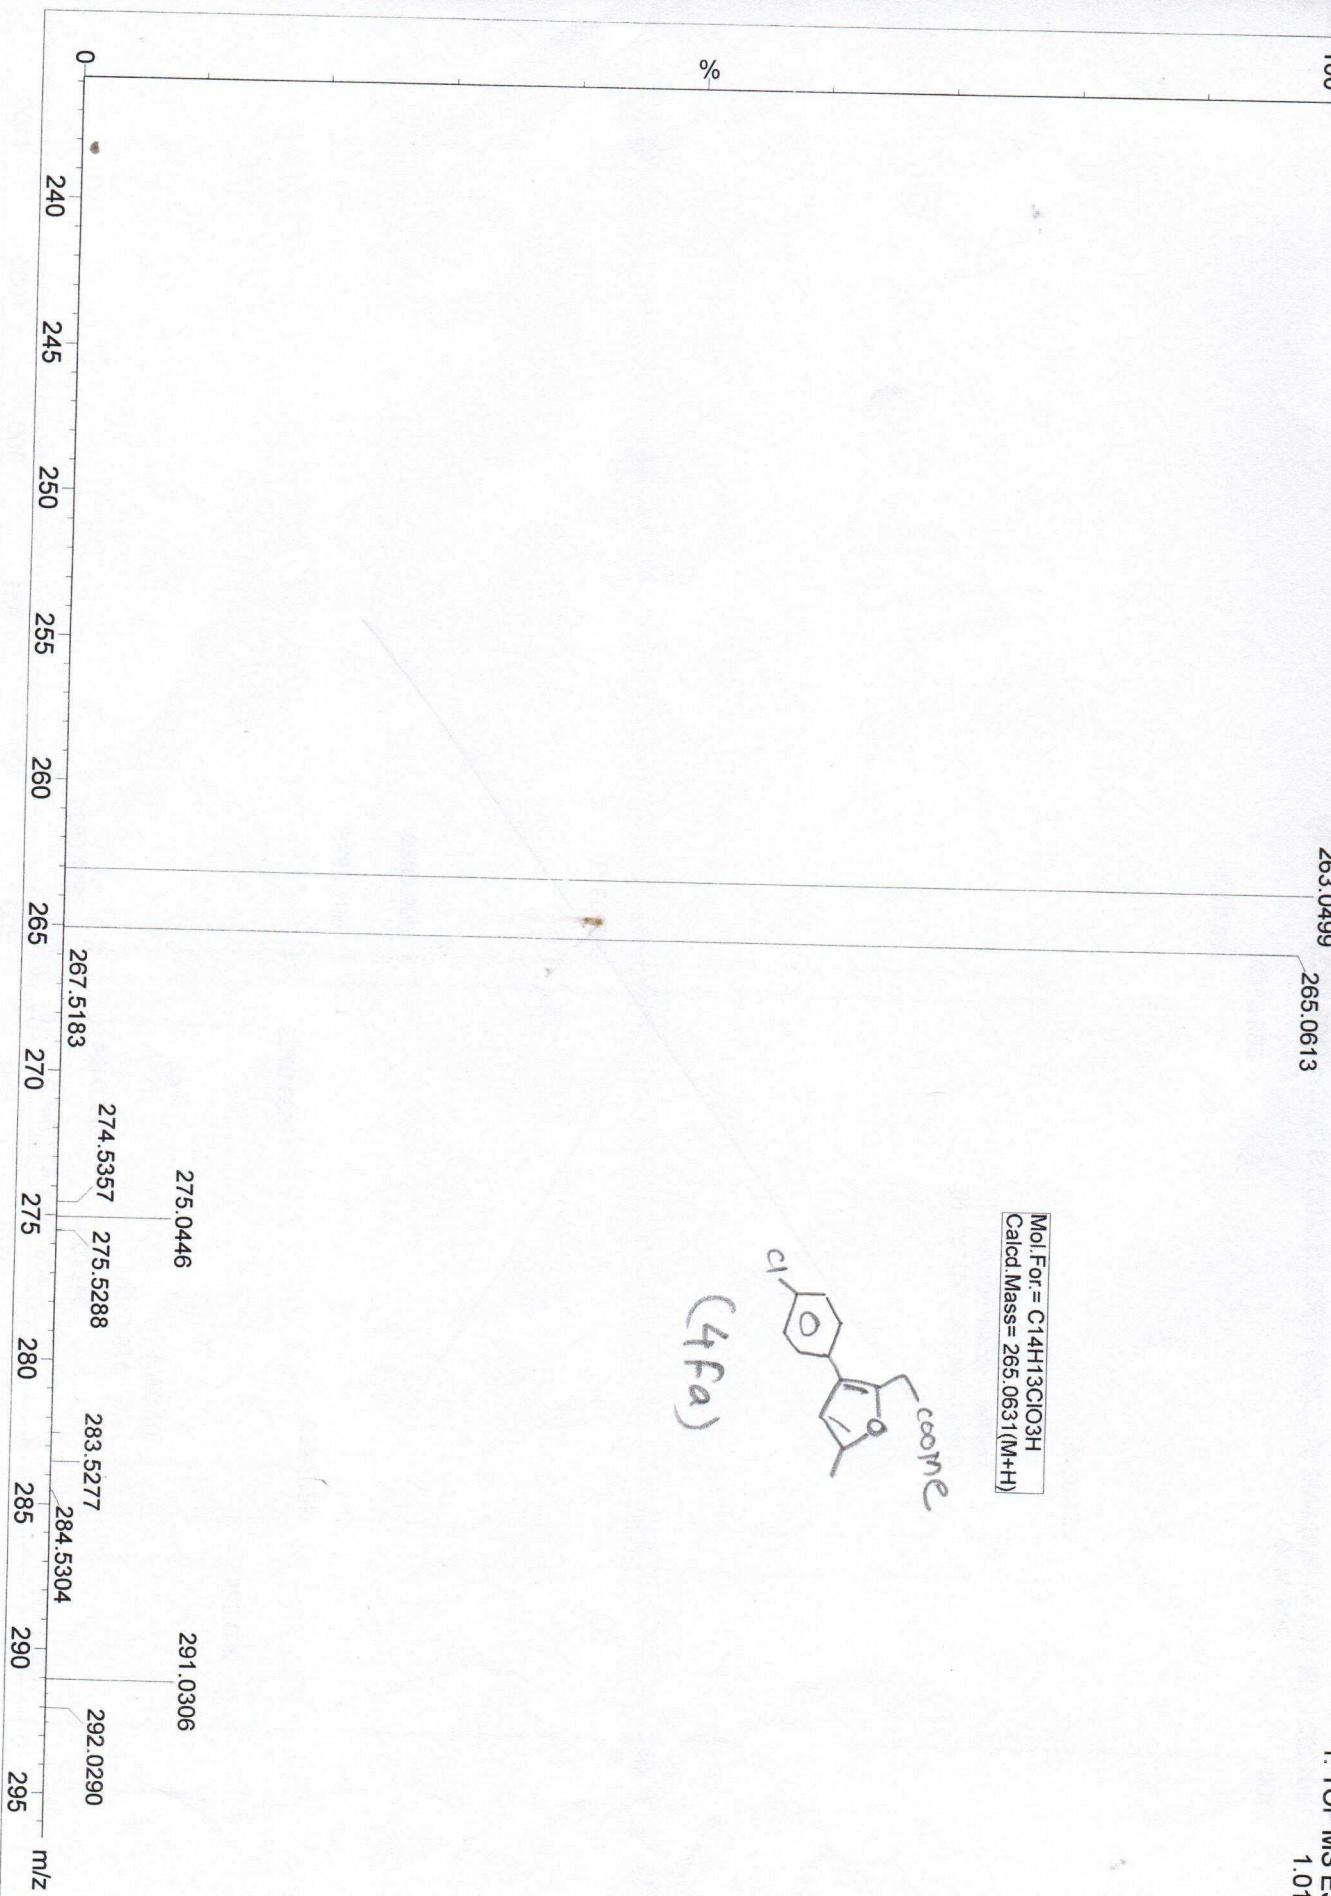

MS-04-054P-II

IISc Organic Chemistry

05112020\_31 66 (0.622) AM2 (Ar,22000,0,556,28,0,00,LS 3); Cm (66-(1:37+168:369))

313.1050

05-Nov-2020  
1: TOF MS ES+  
1.25e6

Mol.F<sub>0</sub> = C<sub>16</sub>H<sub>18</sub>O<sub>5</sub>Na  
Calcd. Mass = 313.1052 (M+Na)

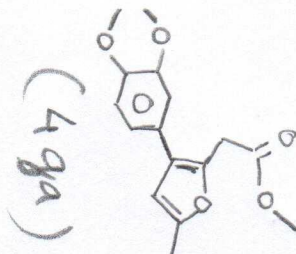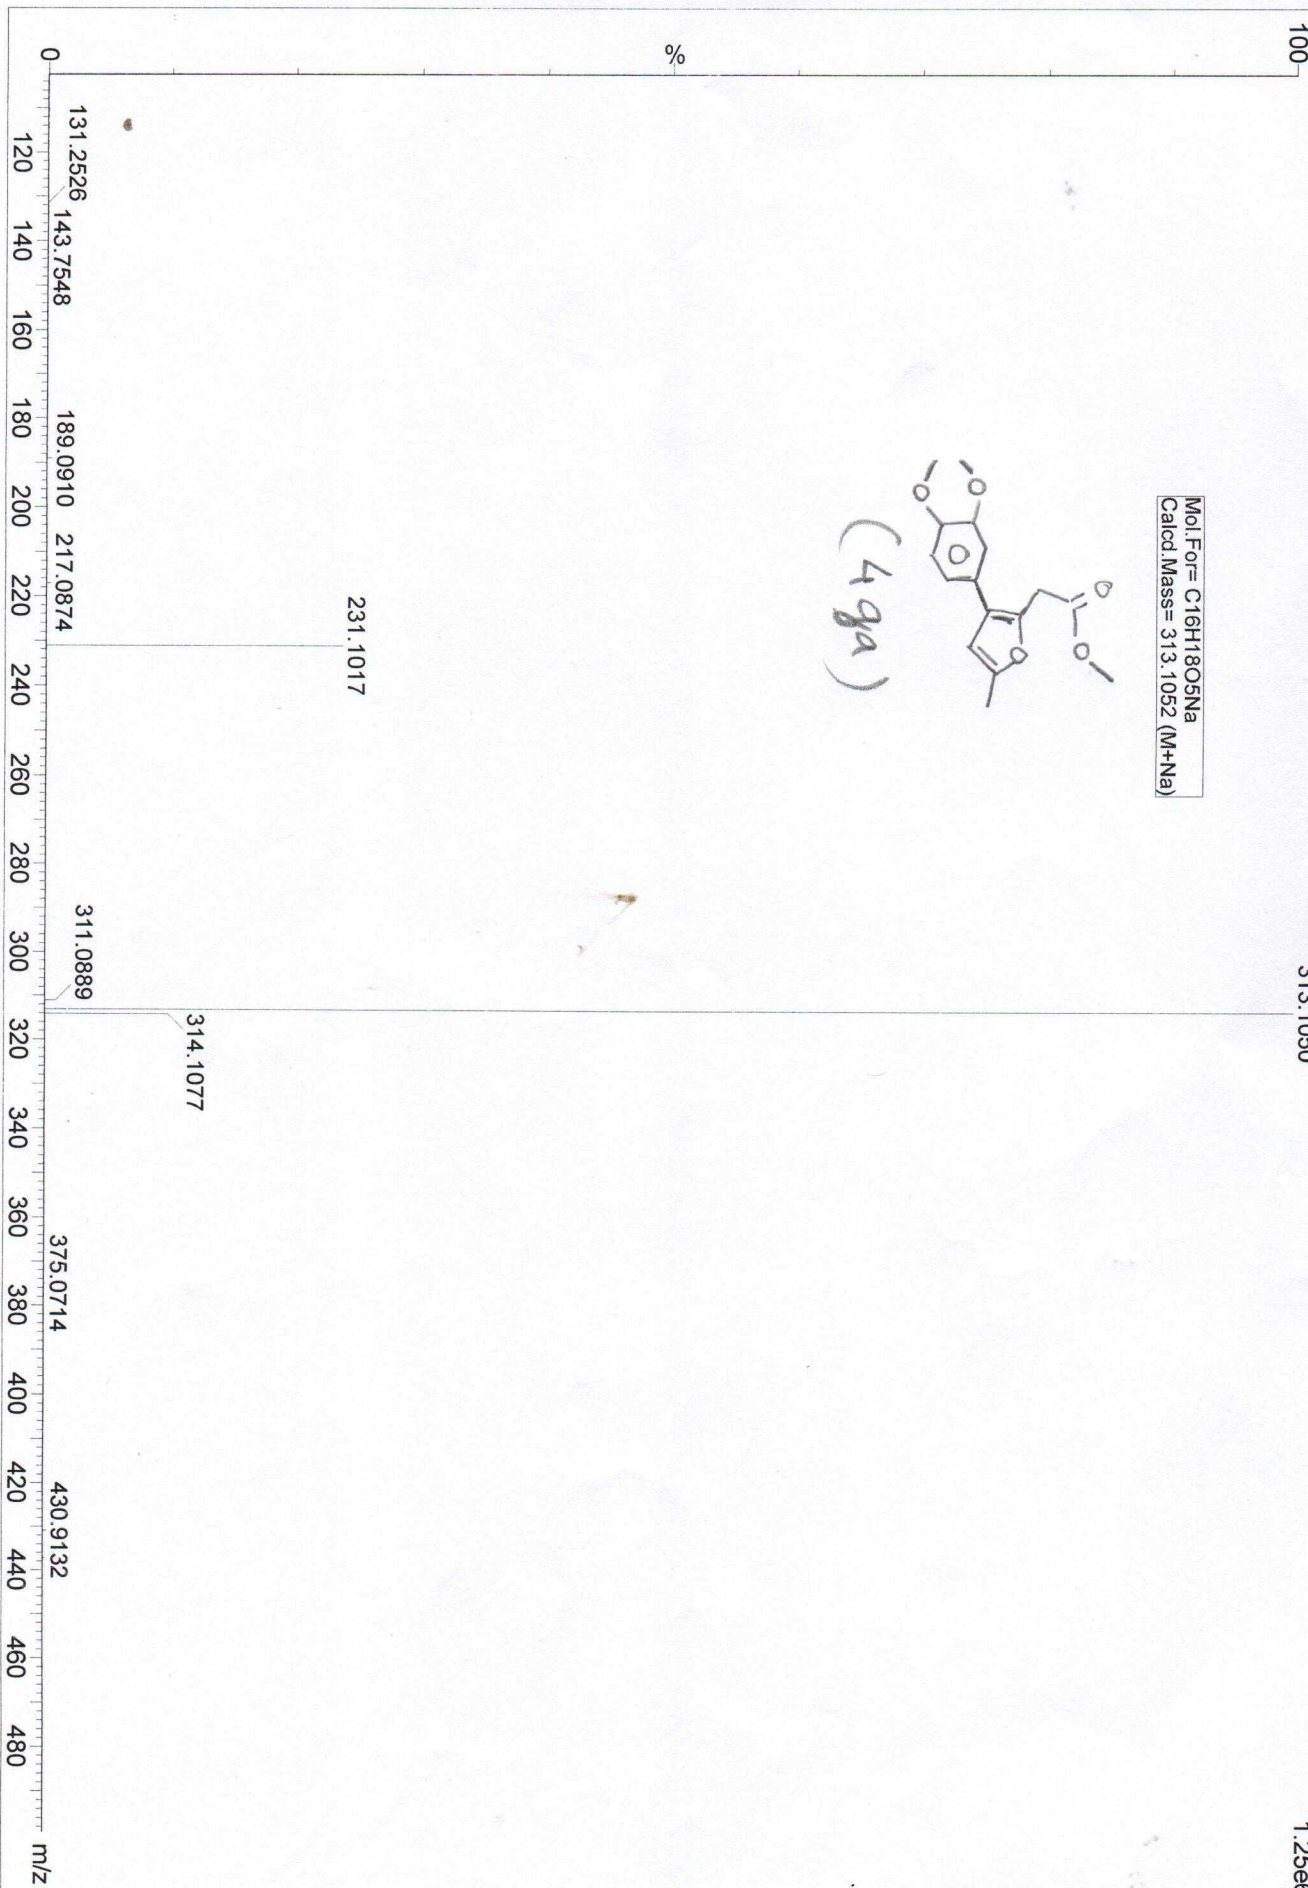



15012021\_18 75 (0.719) AM2 (Ar,22000.0,556.28,0.00,LS 3); Cm (75-397.426)

251.0401

1: TOF MS ES+

7.17e4

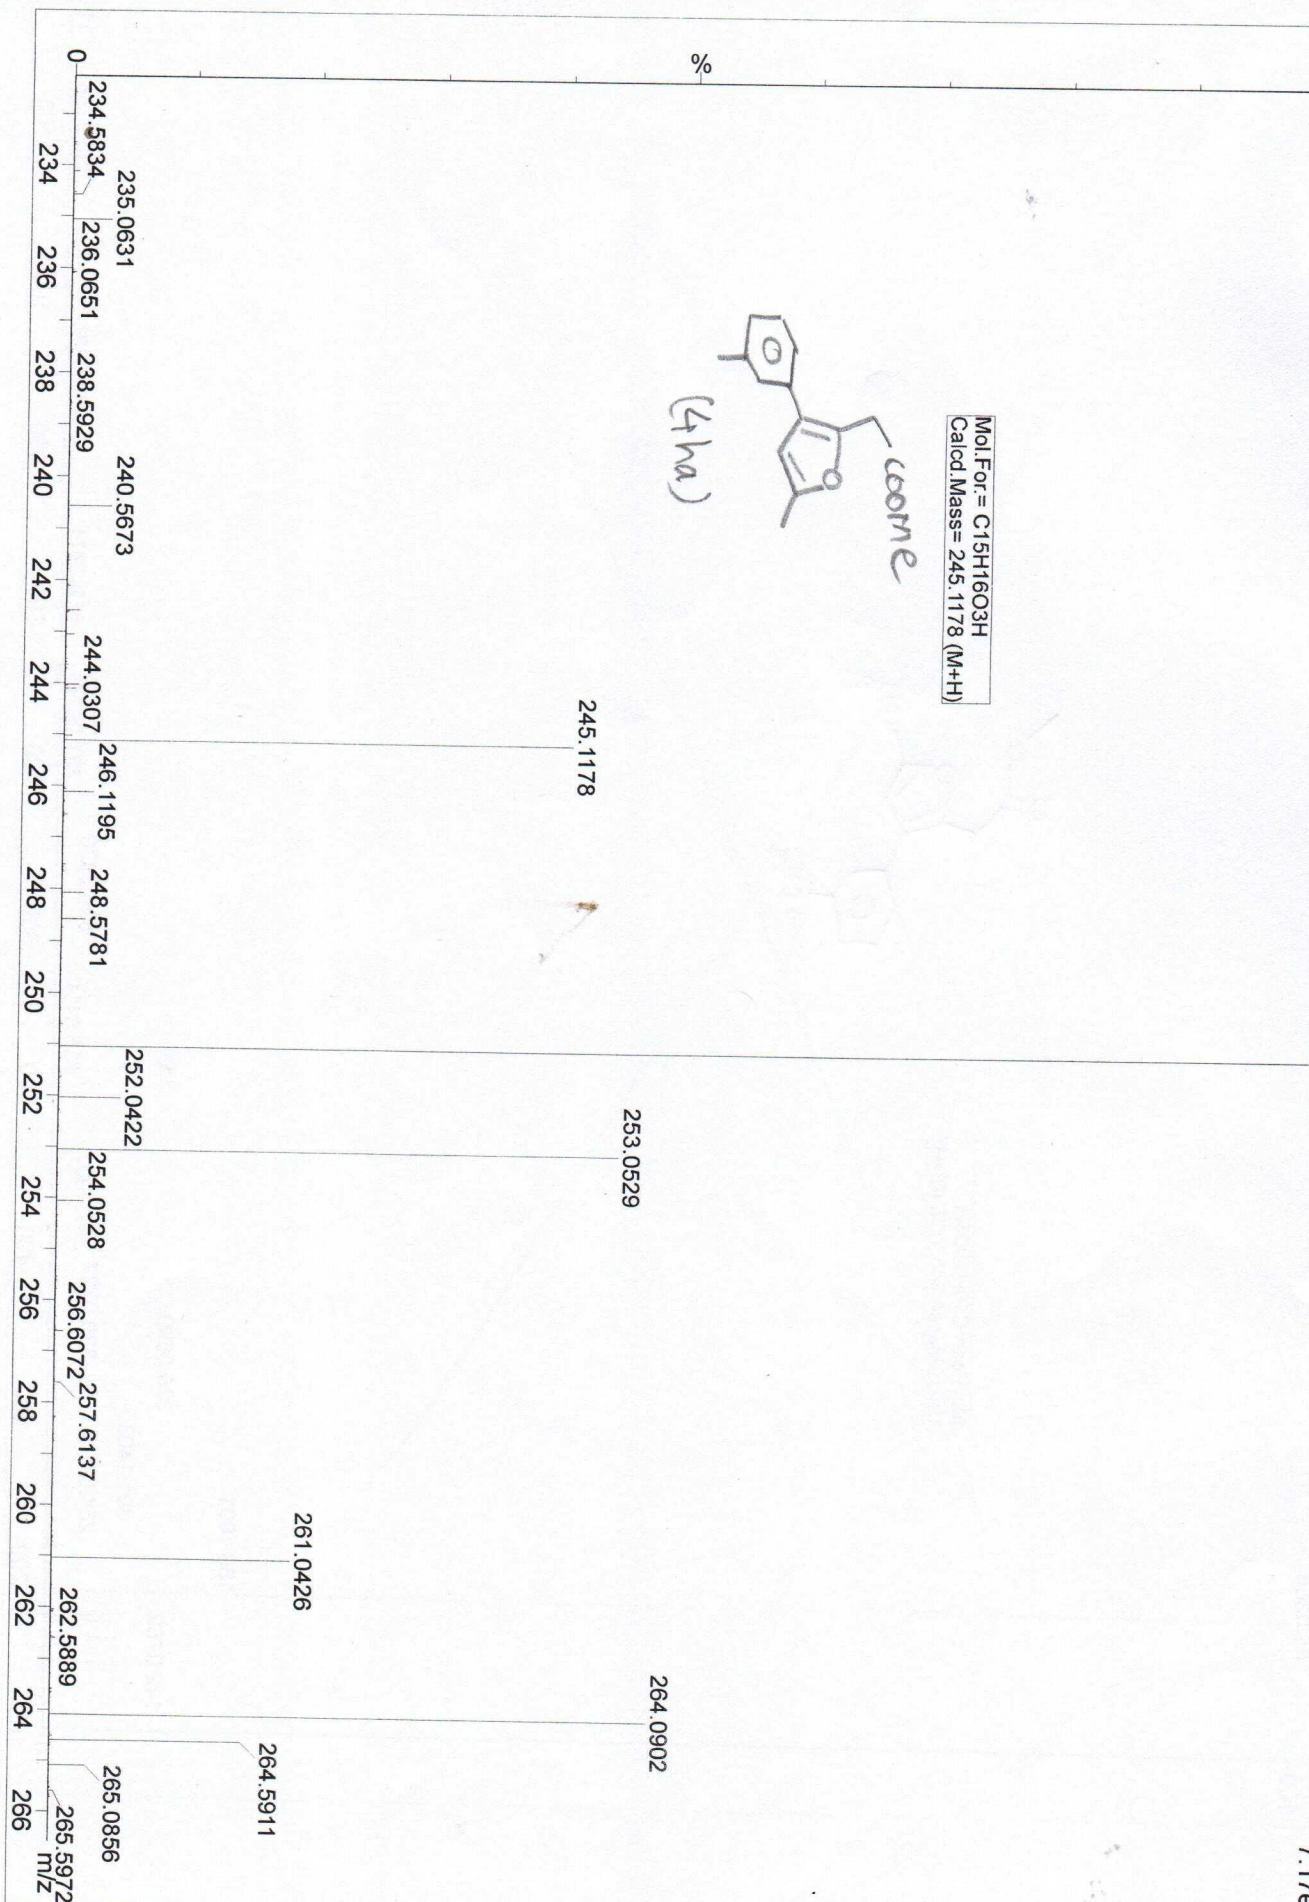

Mol. For = C<sub>14</sub>H<sub>13</sub>BrO<sub>3</sub>H  
Calcd. Mass = 309.0126 (M+H)

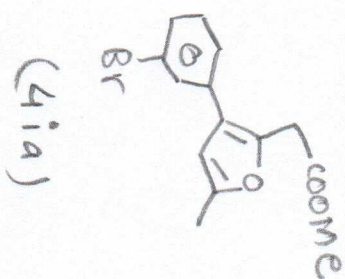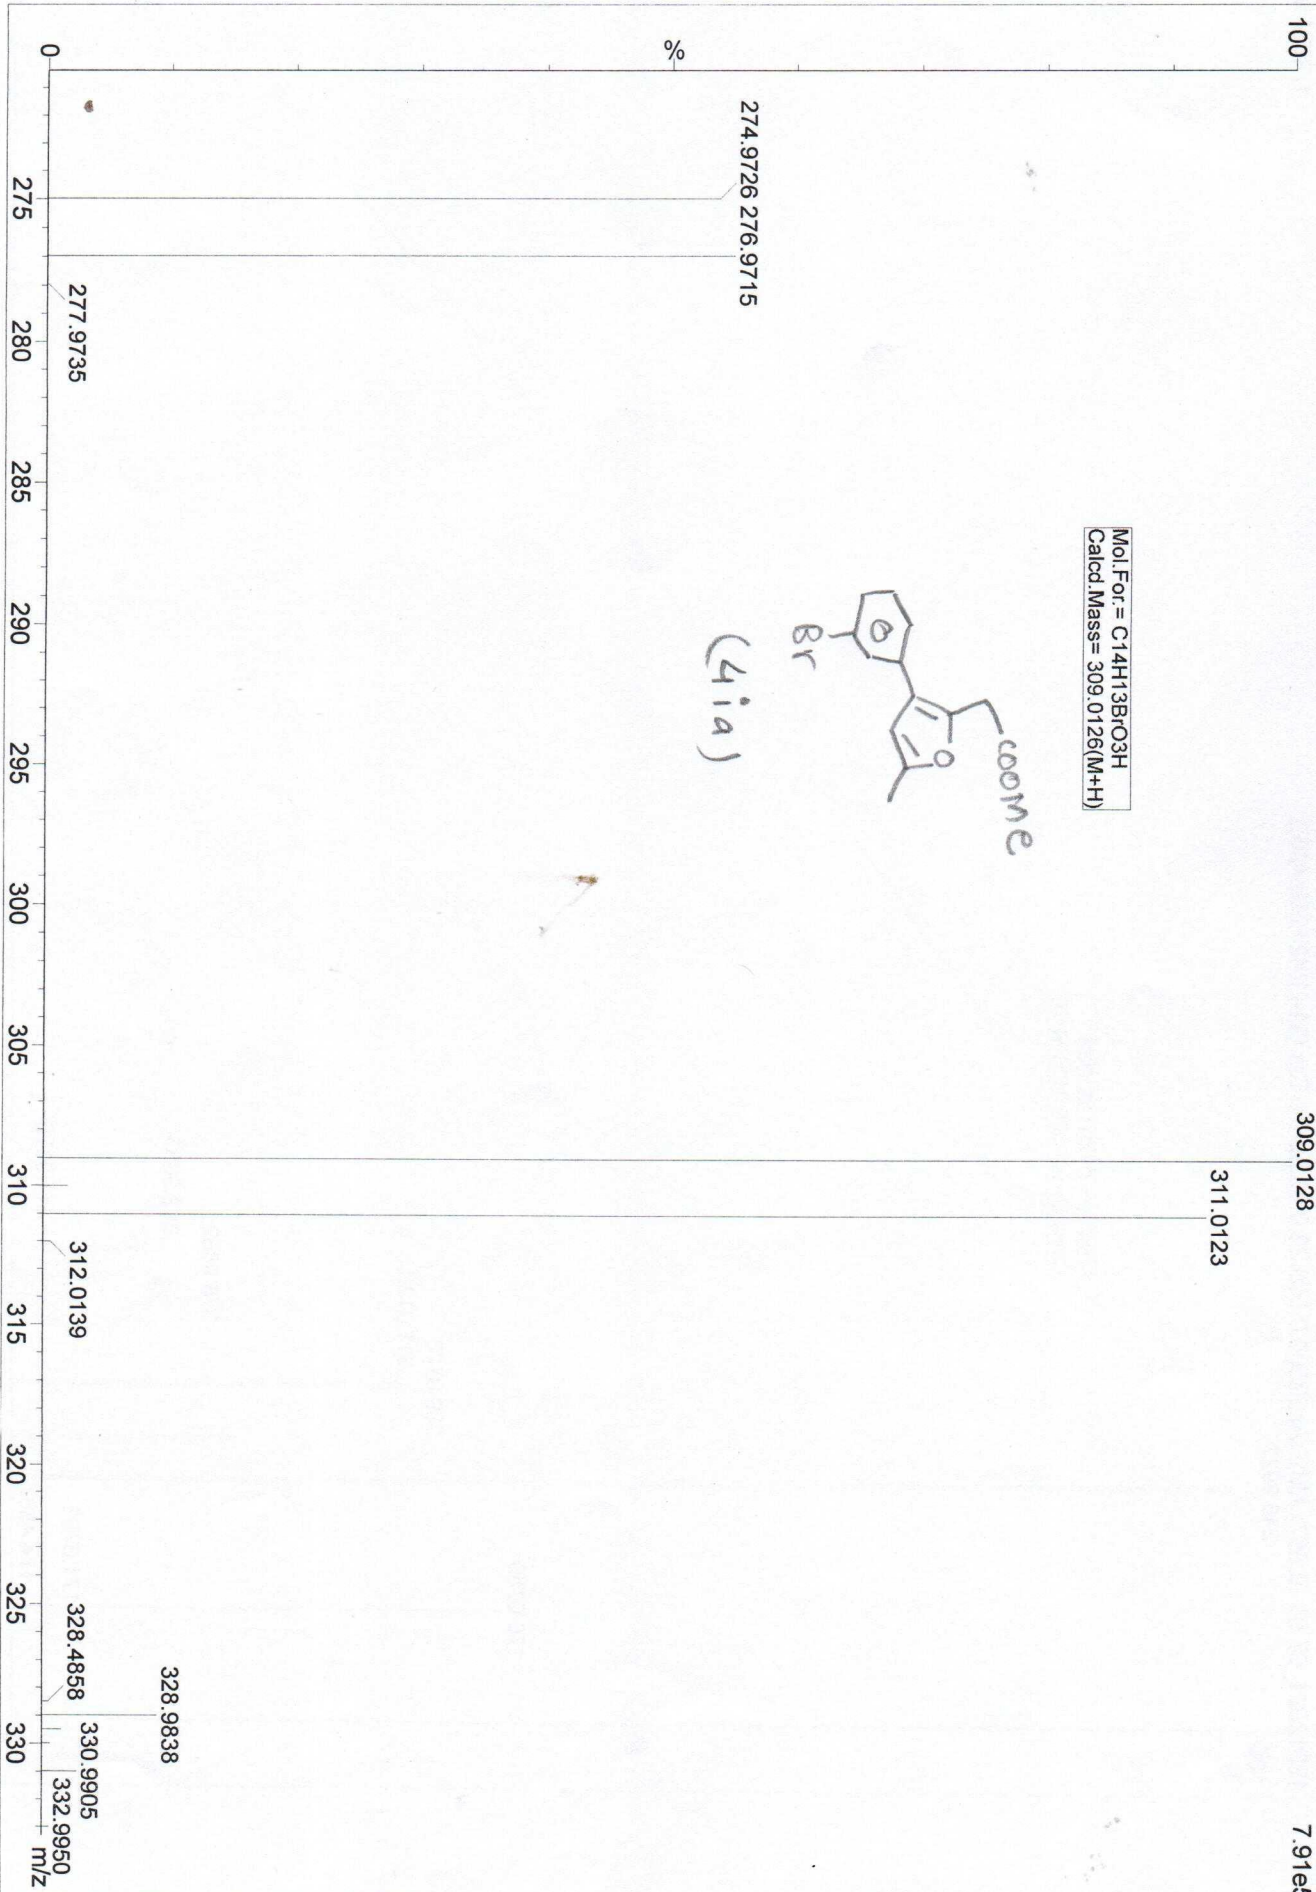

MS-04-079

II Sc Organic Chemistry

07122020\_18 95 (0.891) AM2 (Ar,22000,0,556;28,0,00,LS 3); Cm (95-1.40)  
185.0969

07-Dec-2020  
1: TOF MS ES+  
8.07e6

Mol. For= C<sub>15</sub>H<sub>16</sub>O<sub>3</sub>H  
Calcd. Mass=245.1178(M+H)

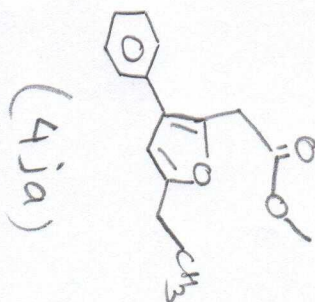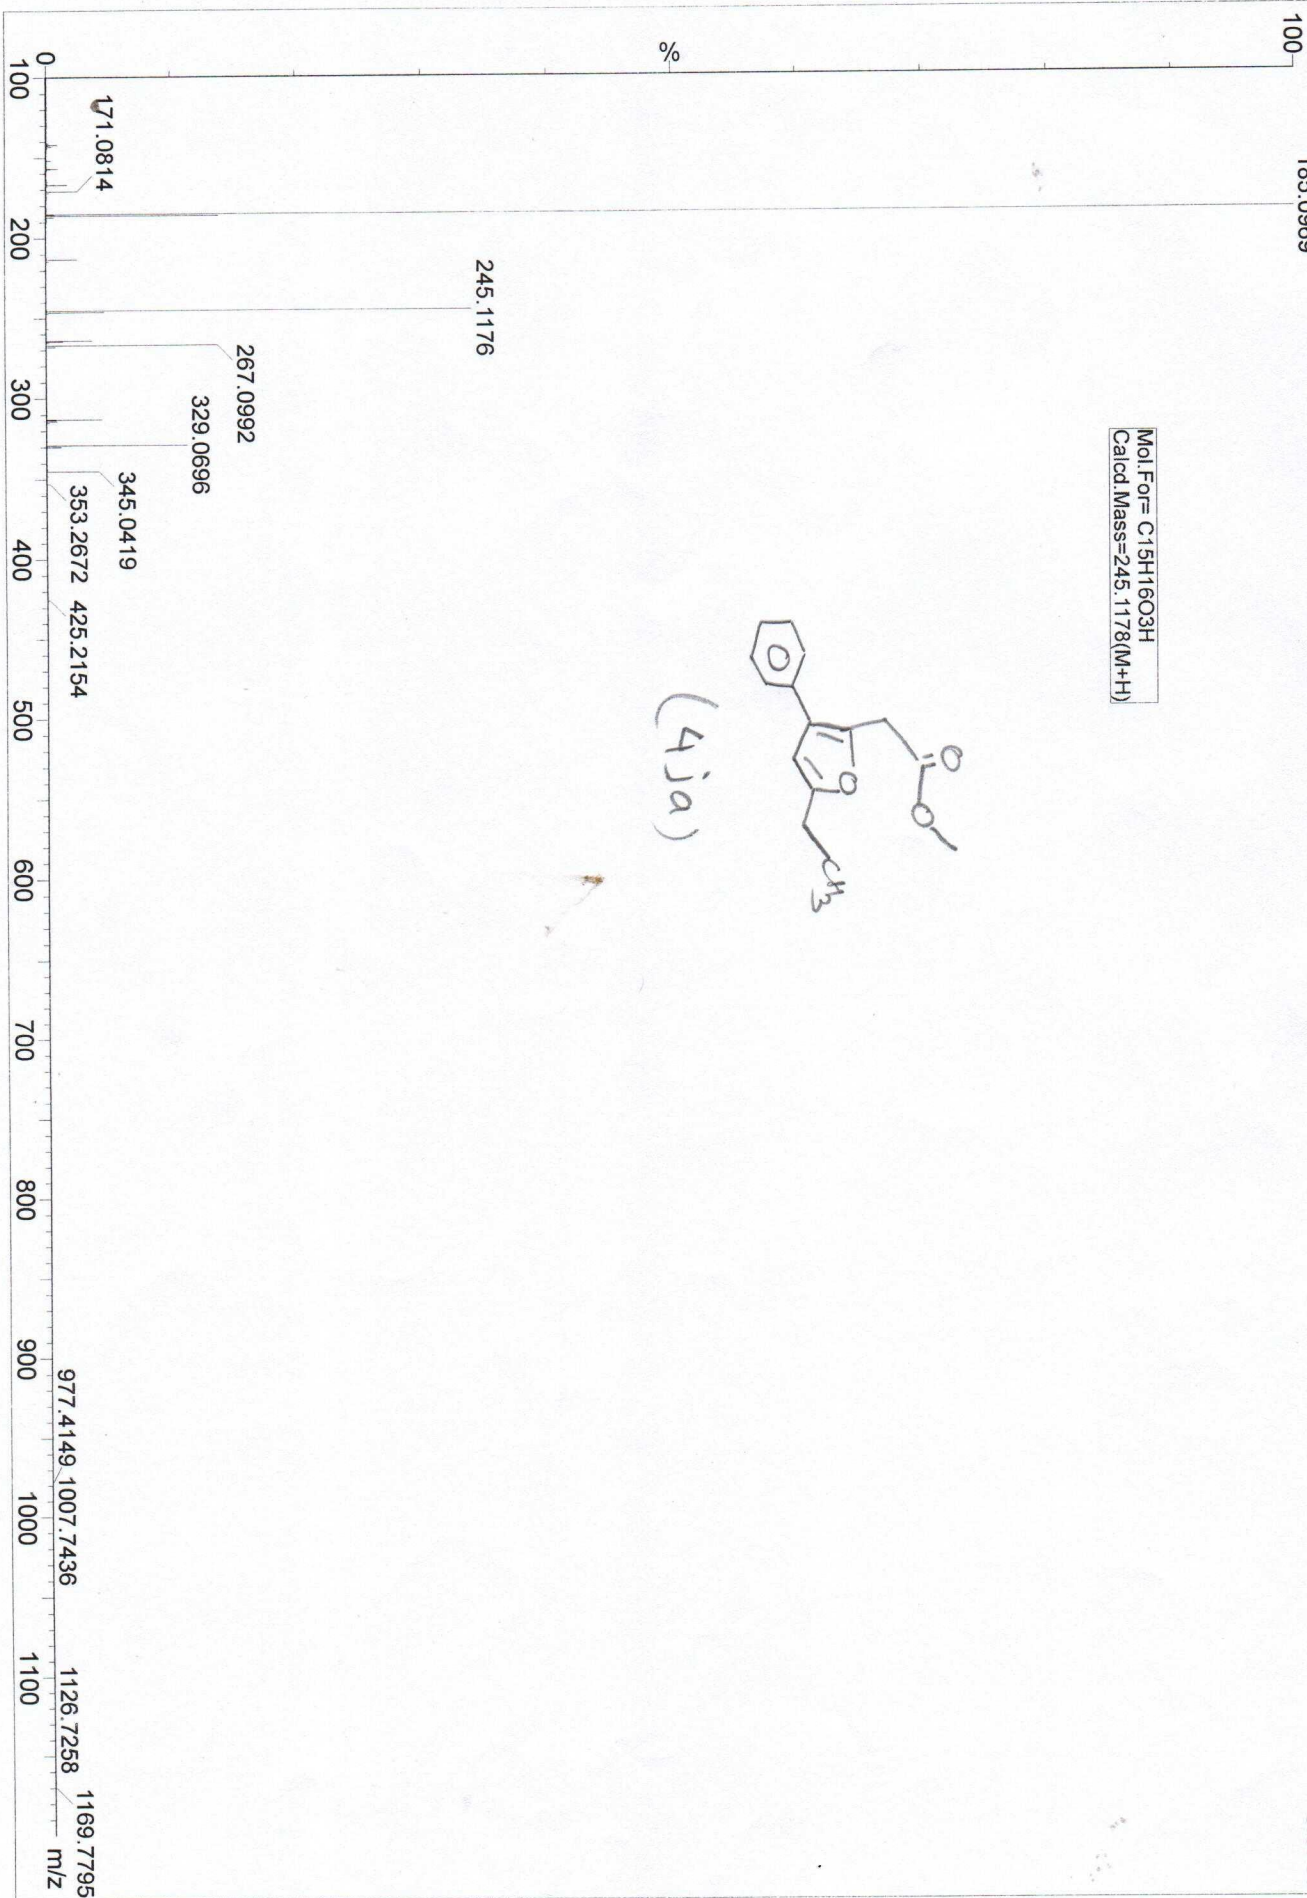

22122020

MS-04-095 21 (0.391) AM2 (Ar,22000,0.556,28,0.00,LS 3)

IISc Organic Chemistry

22-Dec-2020  
1: TOF MS ES+  
5.97e5

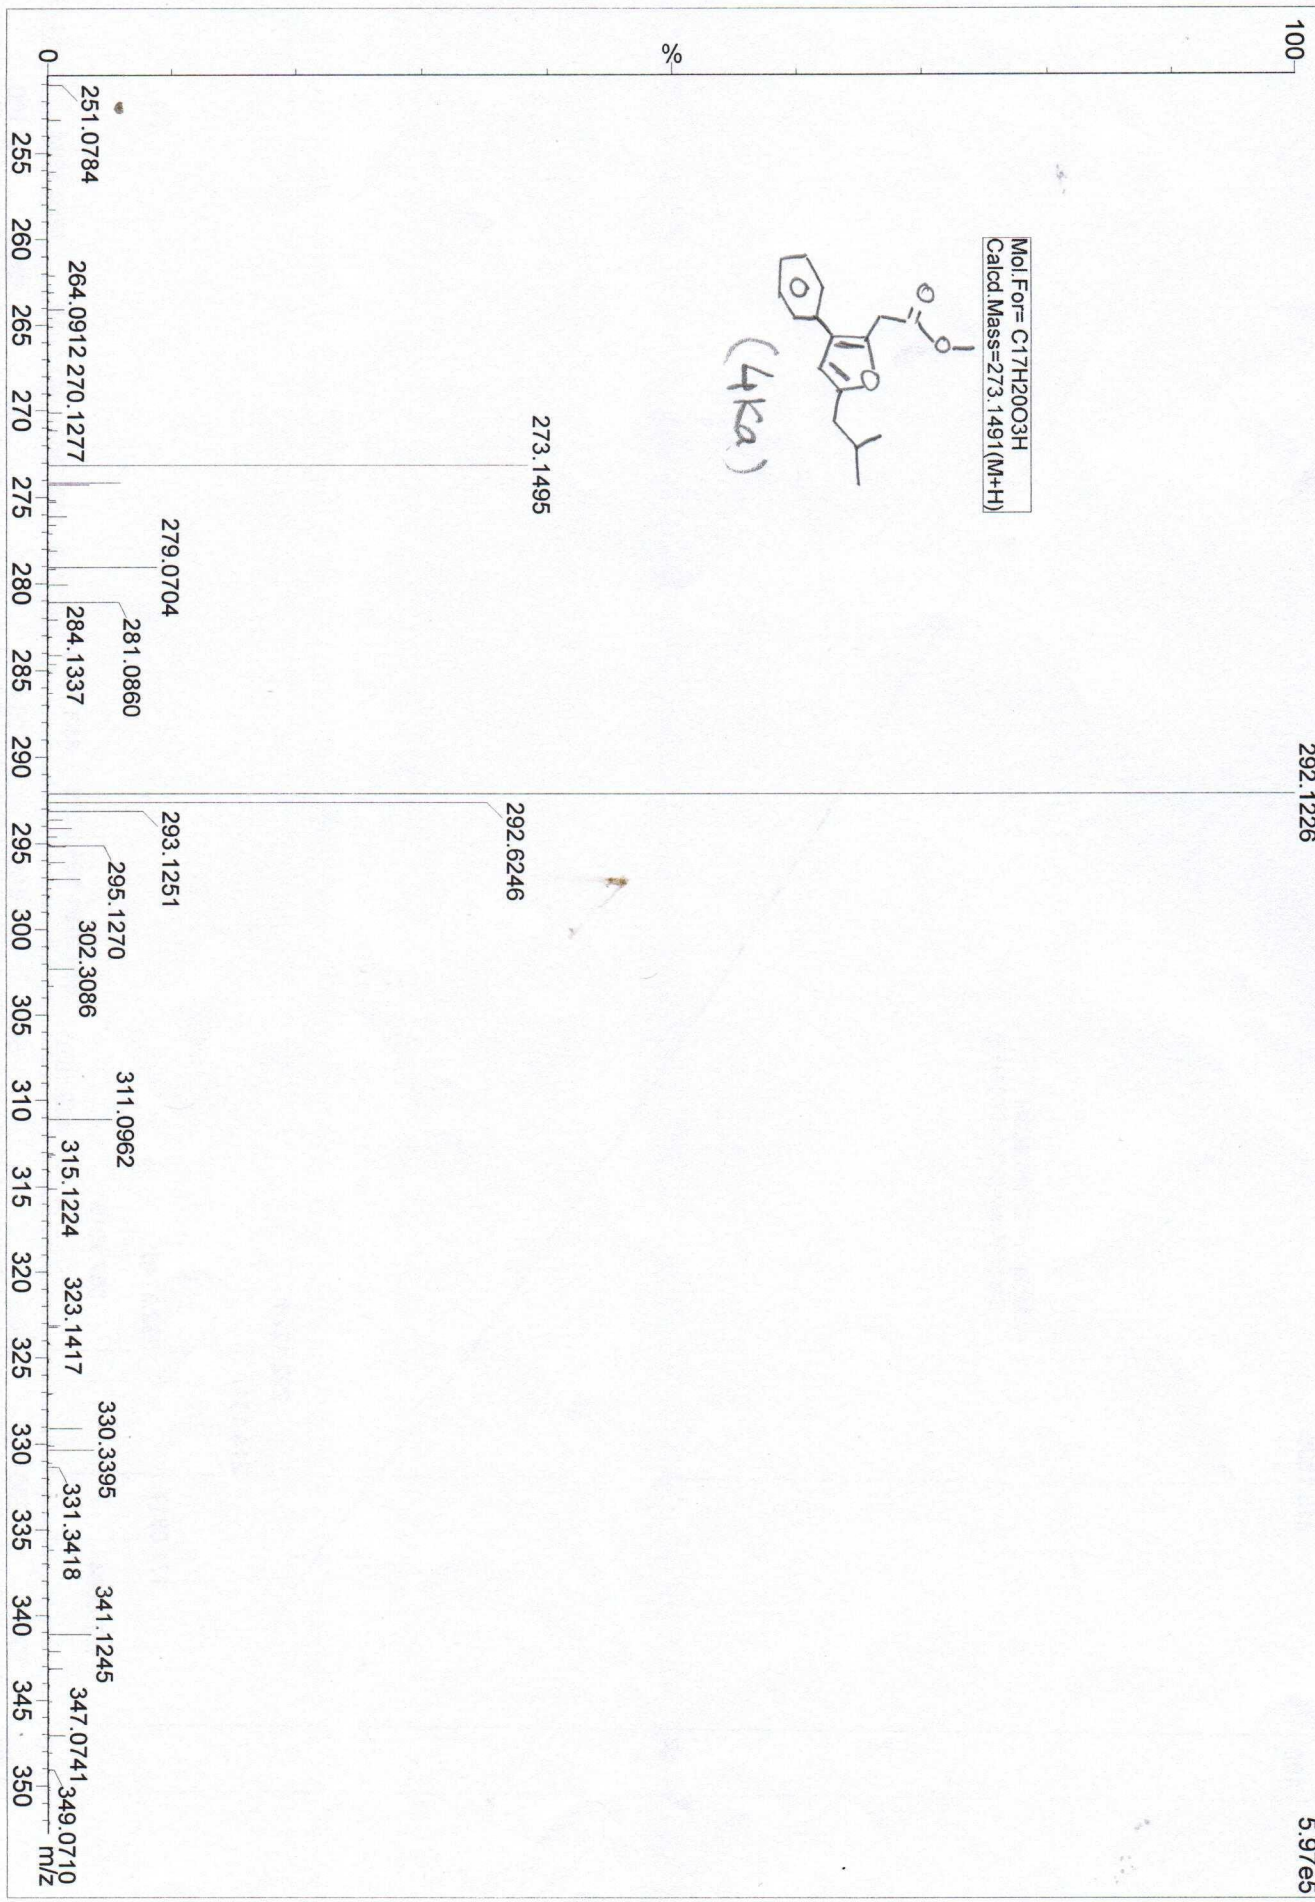

MS-04-093P

15122020\_03 72 (0.674) AM2 (Ar:22000,0.556,28,0.00,LS 3); Cm (72-3:36)

Mol. For = C<sub>18</sub>H<sub>22</sub>O<sub>3</sub>Na  
Calcd. Mass = 309.1467 (M+Na)

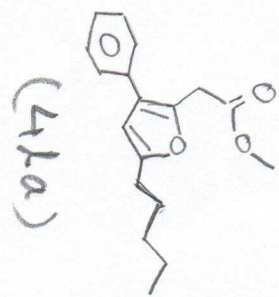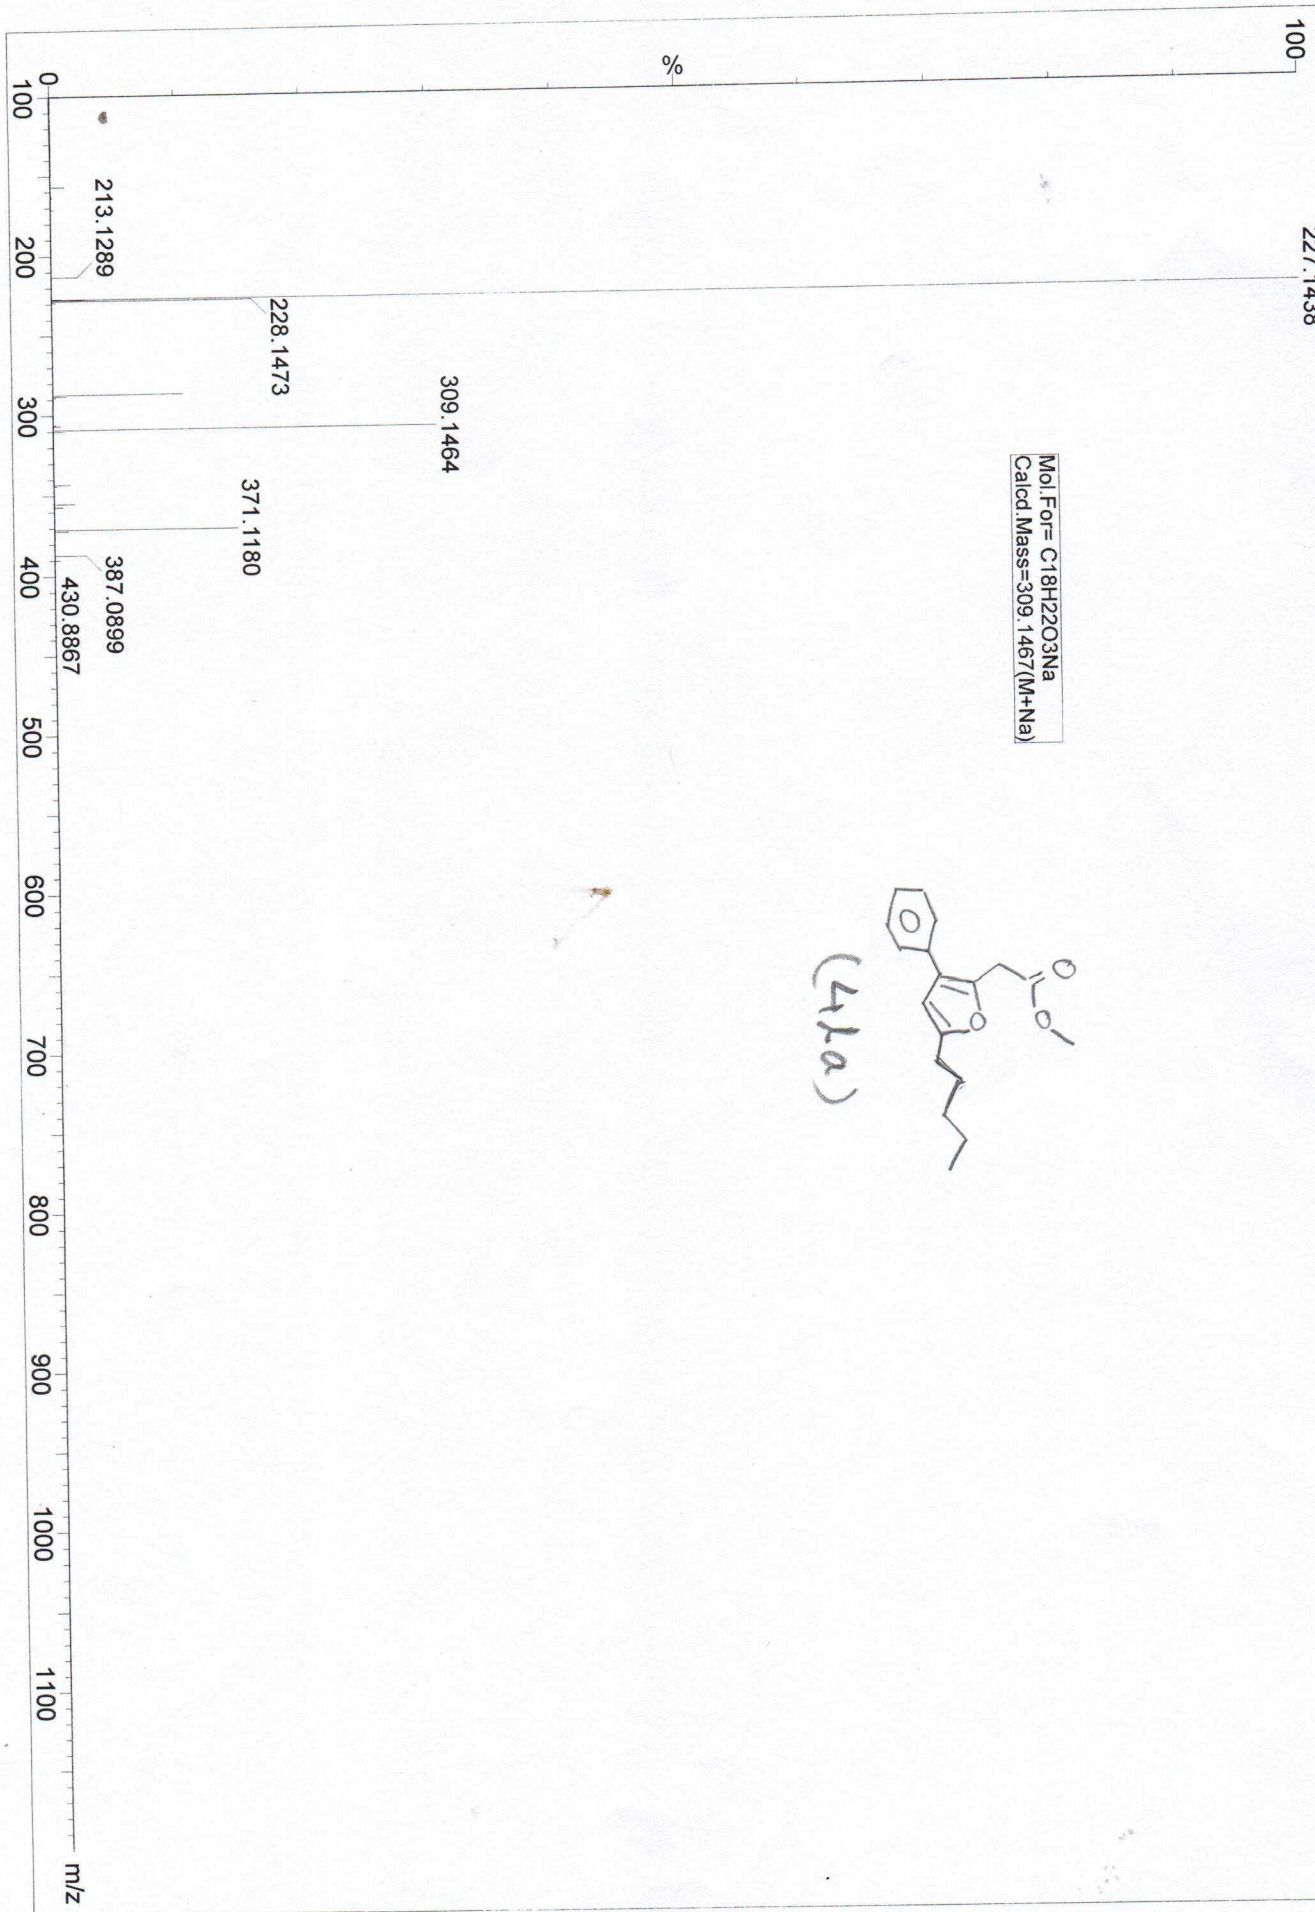

MS-04-091P

II Sc Organic Chemistry

17122020\_30 203 (1.876) AM2 (Ar, 22000.0, 556.28, 0.00, LS 3); Cm (203-14:35)

245.1177

17-Dec-2020  
1: TOF MS ES+  
7.58e4

Mol. For = C<sub>15</sub>H<sub>16</sub>O<sub>3</sub>H  
Calcd. Mass = 245.1178 (M+H)

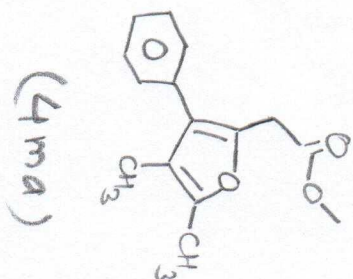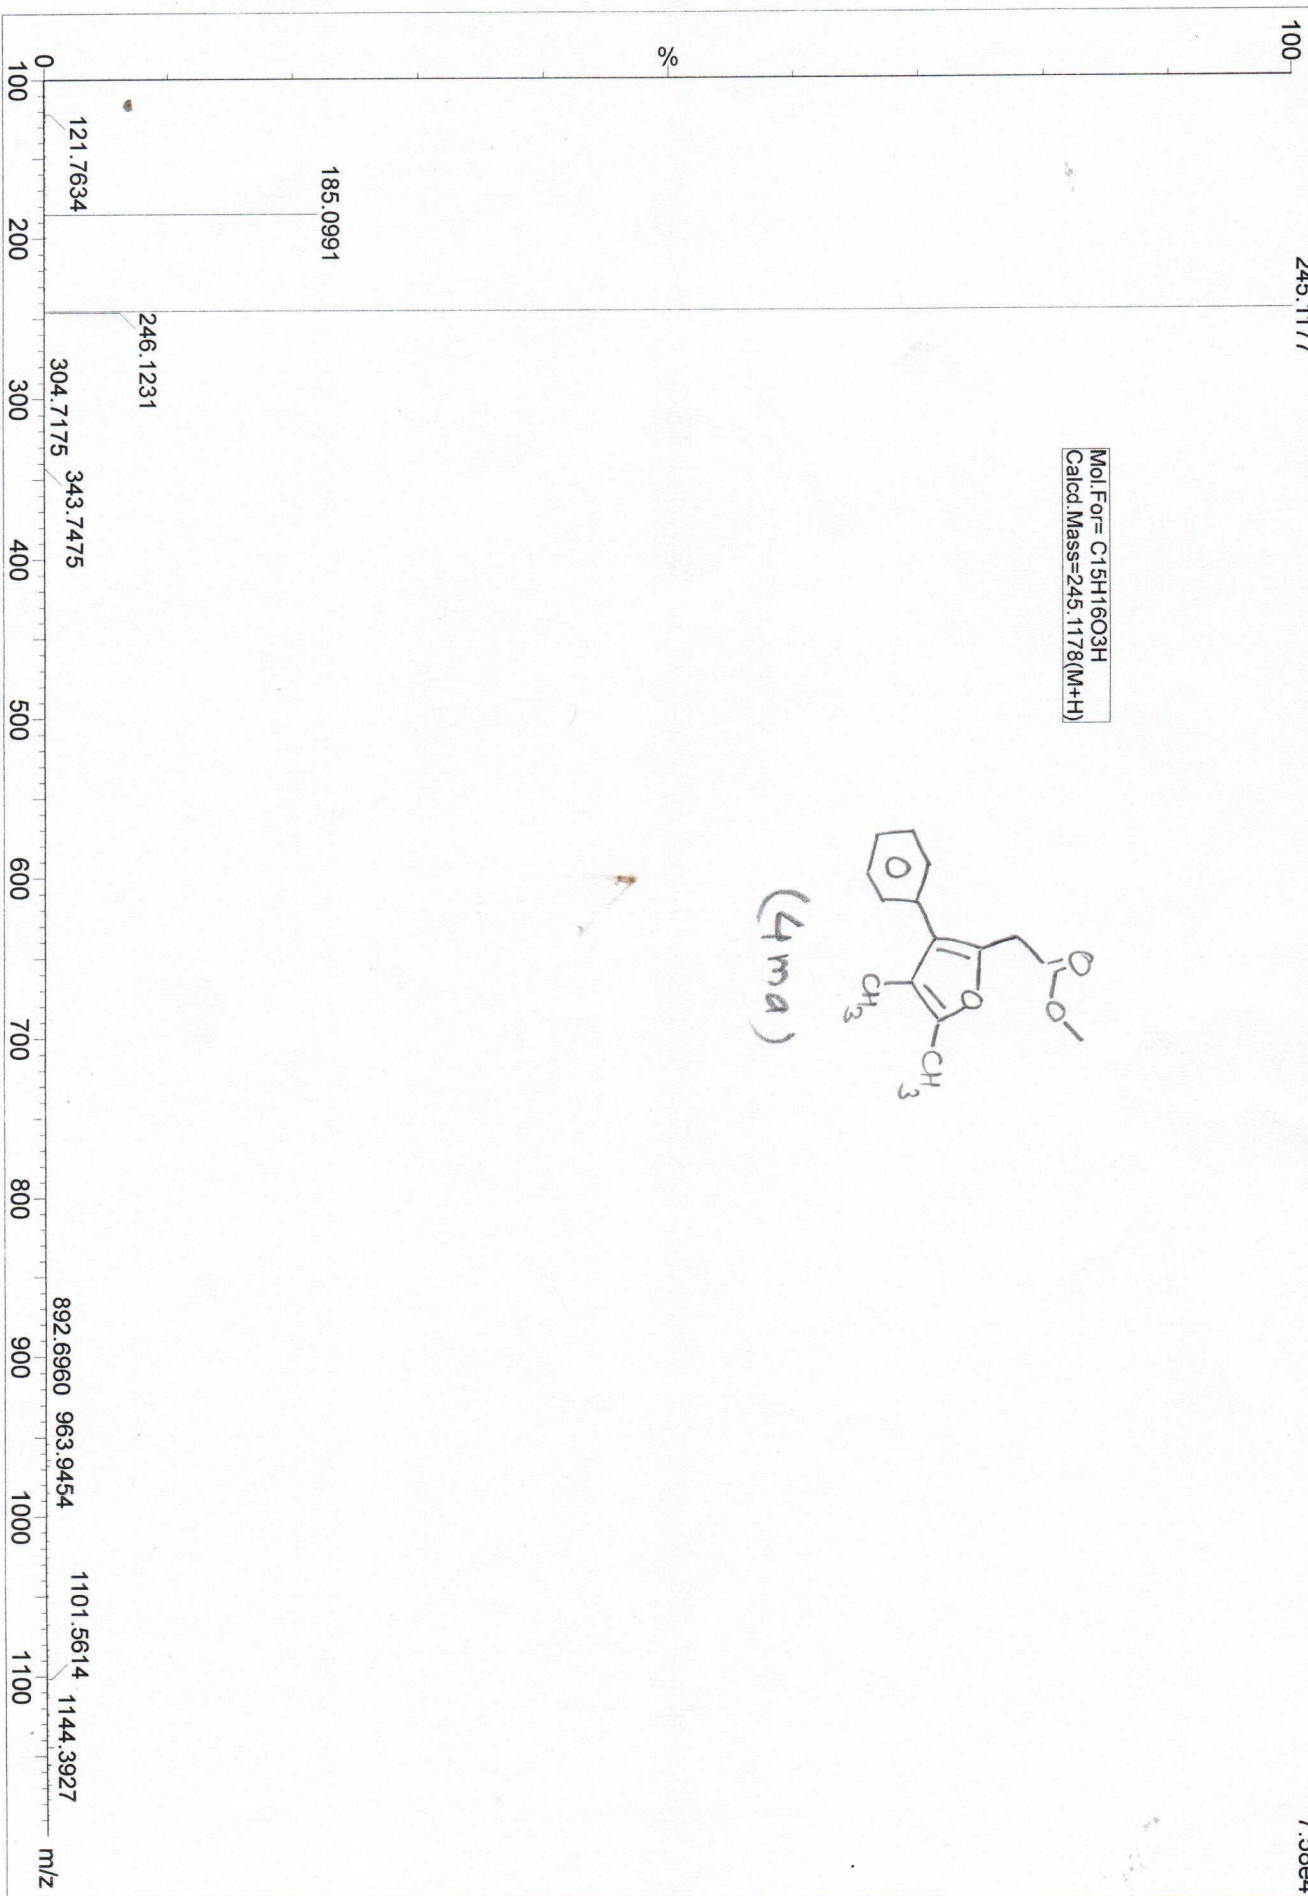

MS-04-060

IISc Organic Chemistry

19-Jan-2021

19012021\_47 79 (0.754) AM2 (Ar:22000,0,556,28,0,00,LS 3); Cm (79-(1:35+181:435))

267.0998

1: TOF MS ES+  
1.41e5

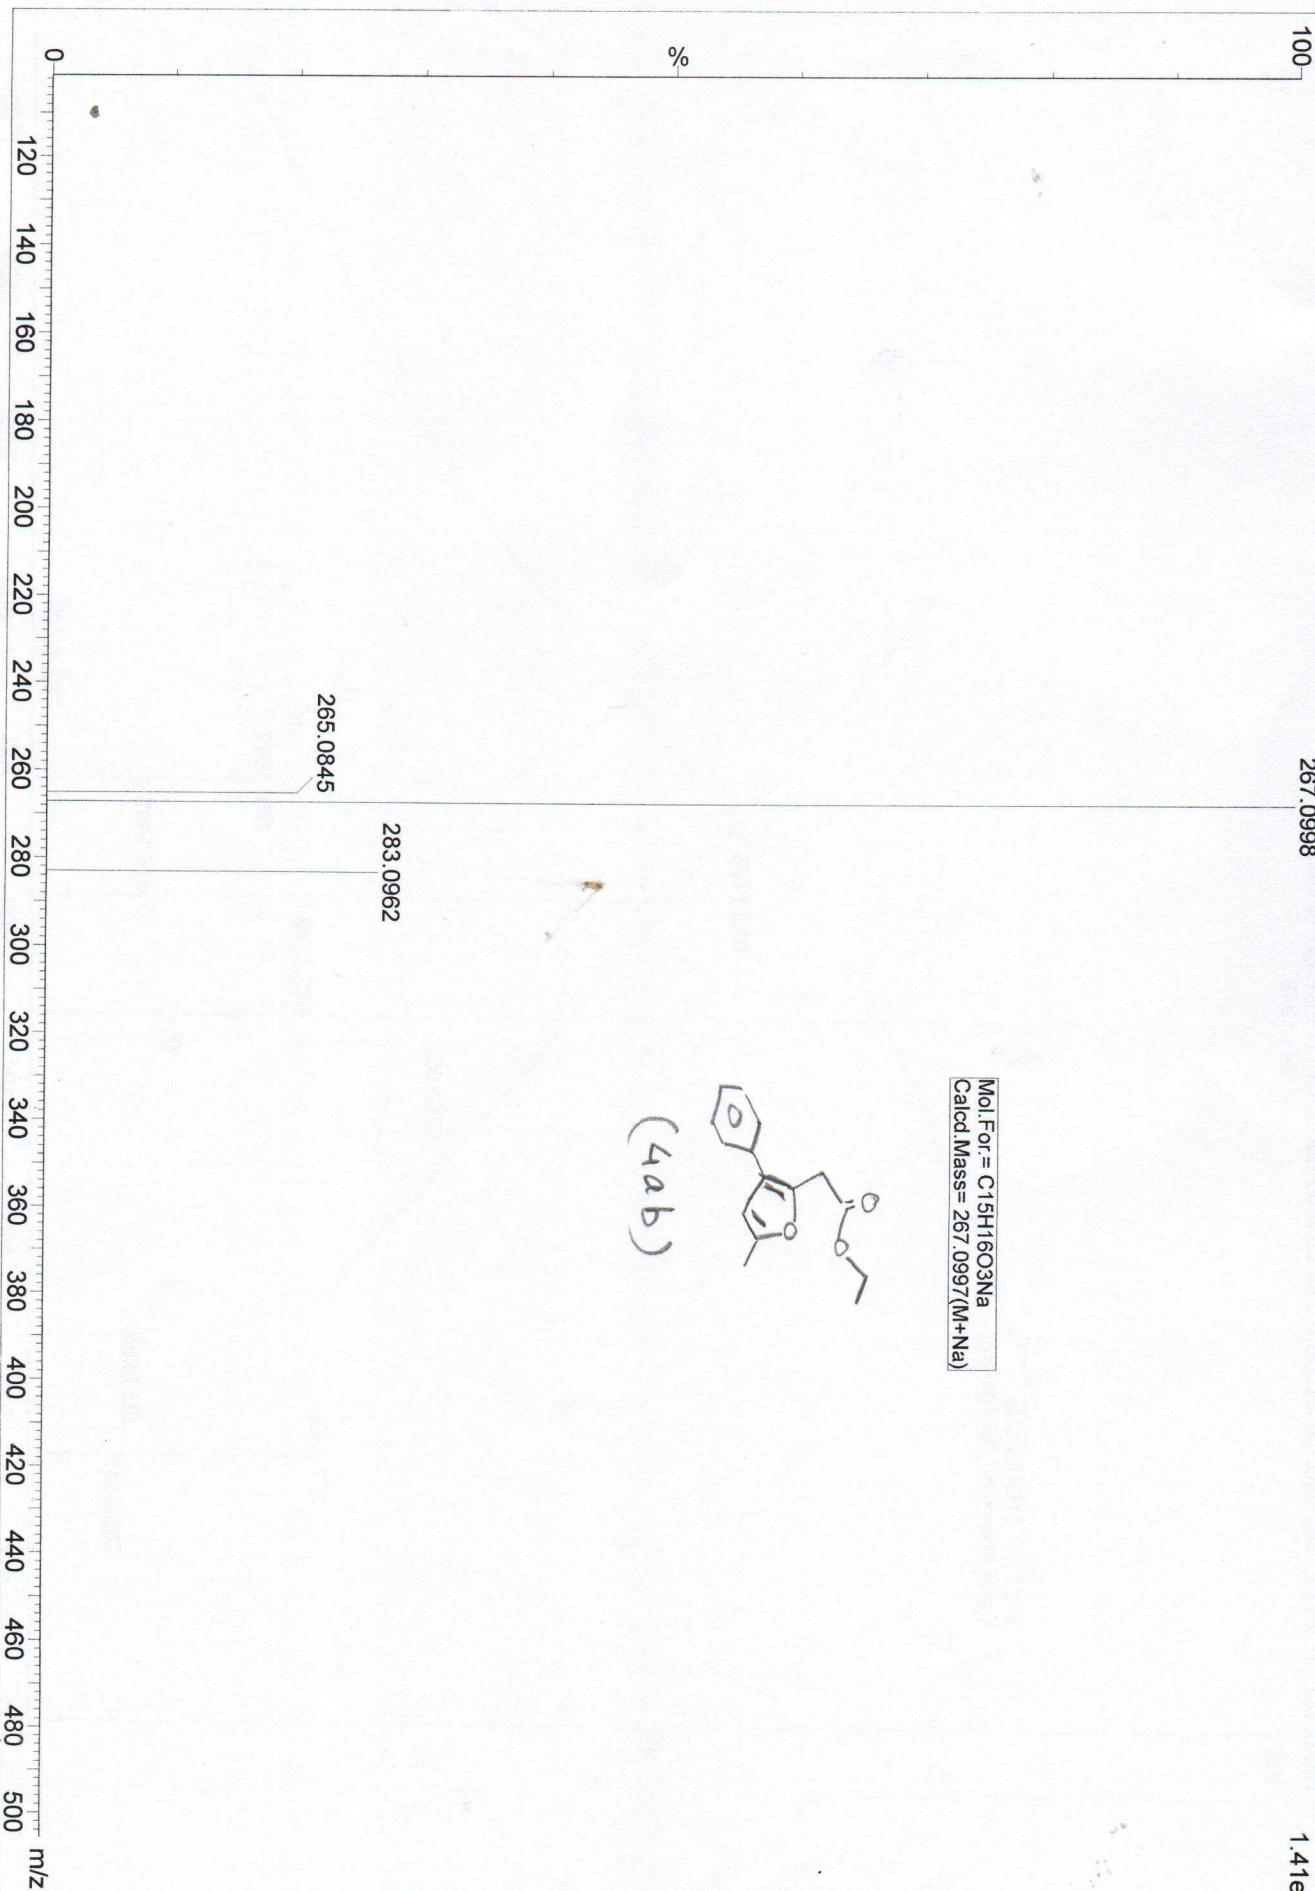

MS-04-058

II Sc Organic Chemistry

19-Jan-2021

19012021\_08 87 (0.822) AM2 (Ar,22000.0,556.28,0.00,LS 3); Cm (87-265:435)

171.0821

1: TOF MS ES+  
3.78e6

Mol. For = C<sub>17</sub>H<sub>20</sub>O<sub>3</sub>Na  
Calc'd Mass = 295.1310(M+Na)

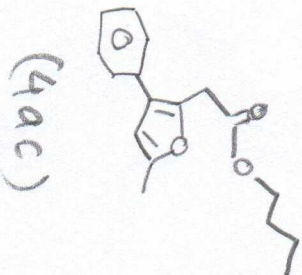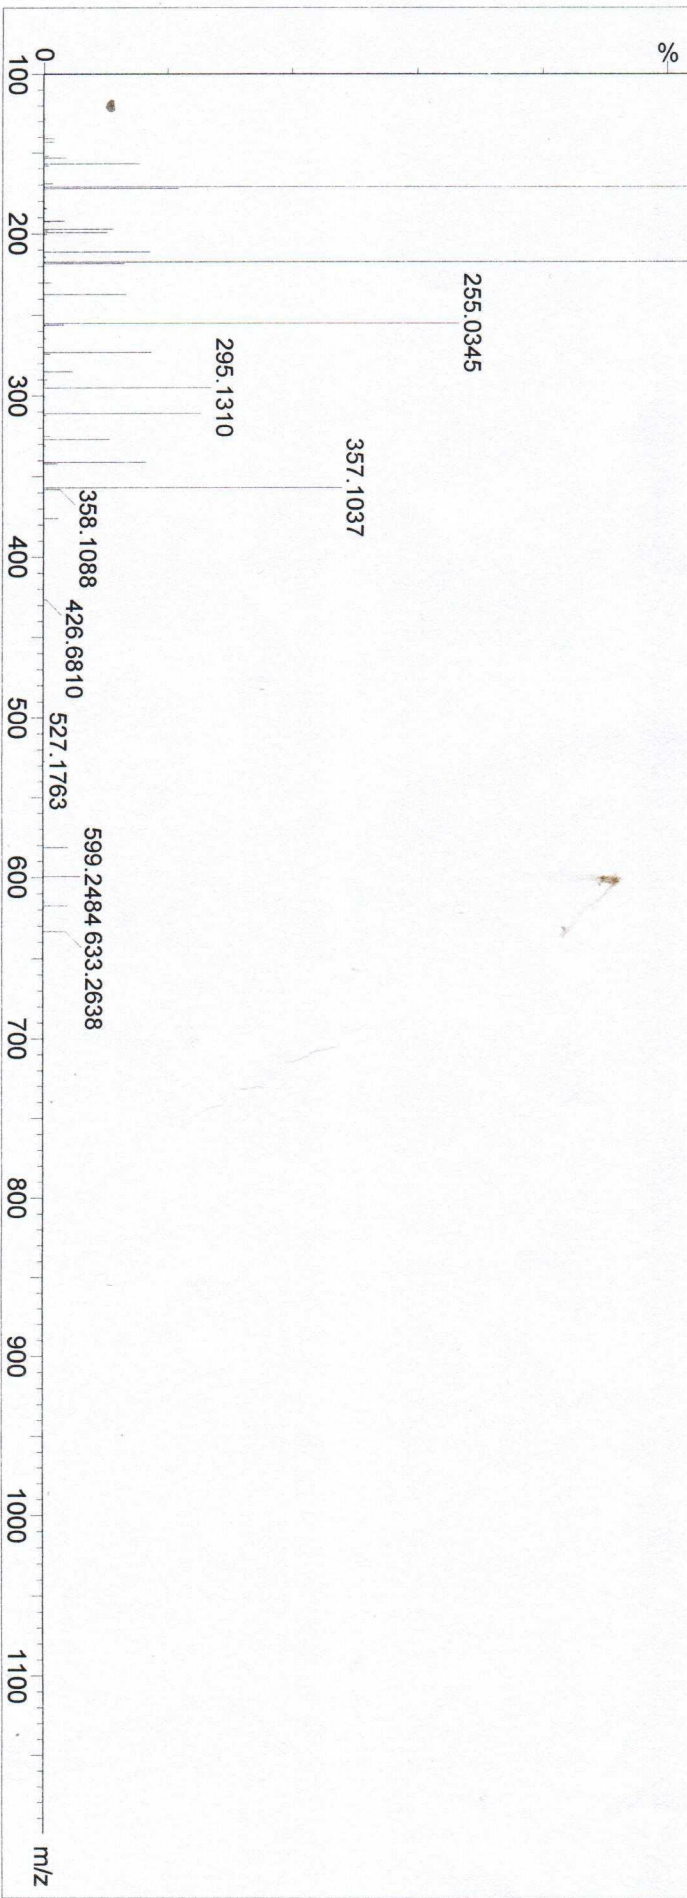



MS-04-102

IISc Organic Chemistry

14-Jan-2021

14012021\_13 53 (0.511) AM2 (Ar:22000,0.556,28,0.00,LS 3): Cm (53-(19:30+291:309))

1: TOF MS ES+  
1.50e5

327.1048

Mol. For = C<sub>20</sub>H<sub>18</sub>O<sub>3</sub>Na  
Calcd. Mass = 329.1154 (M+Na)

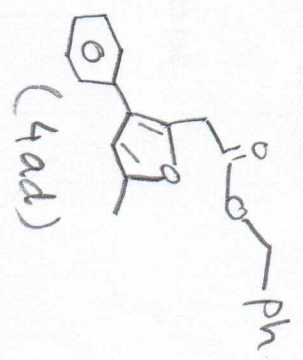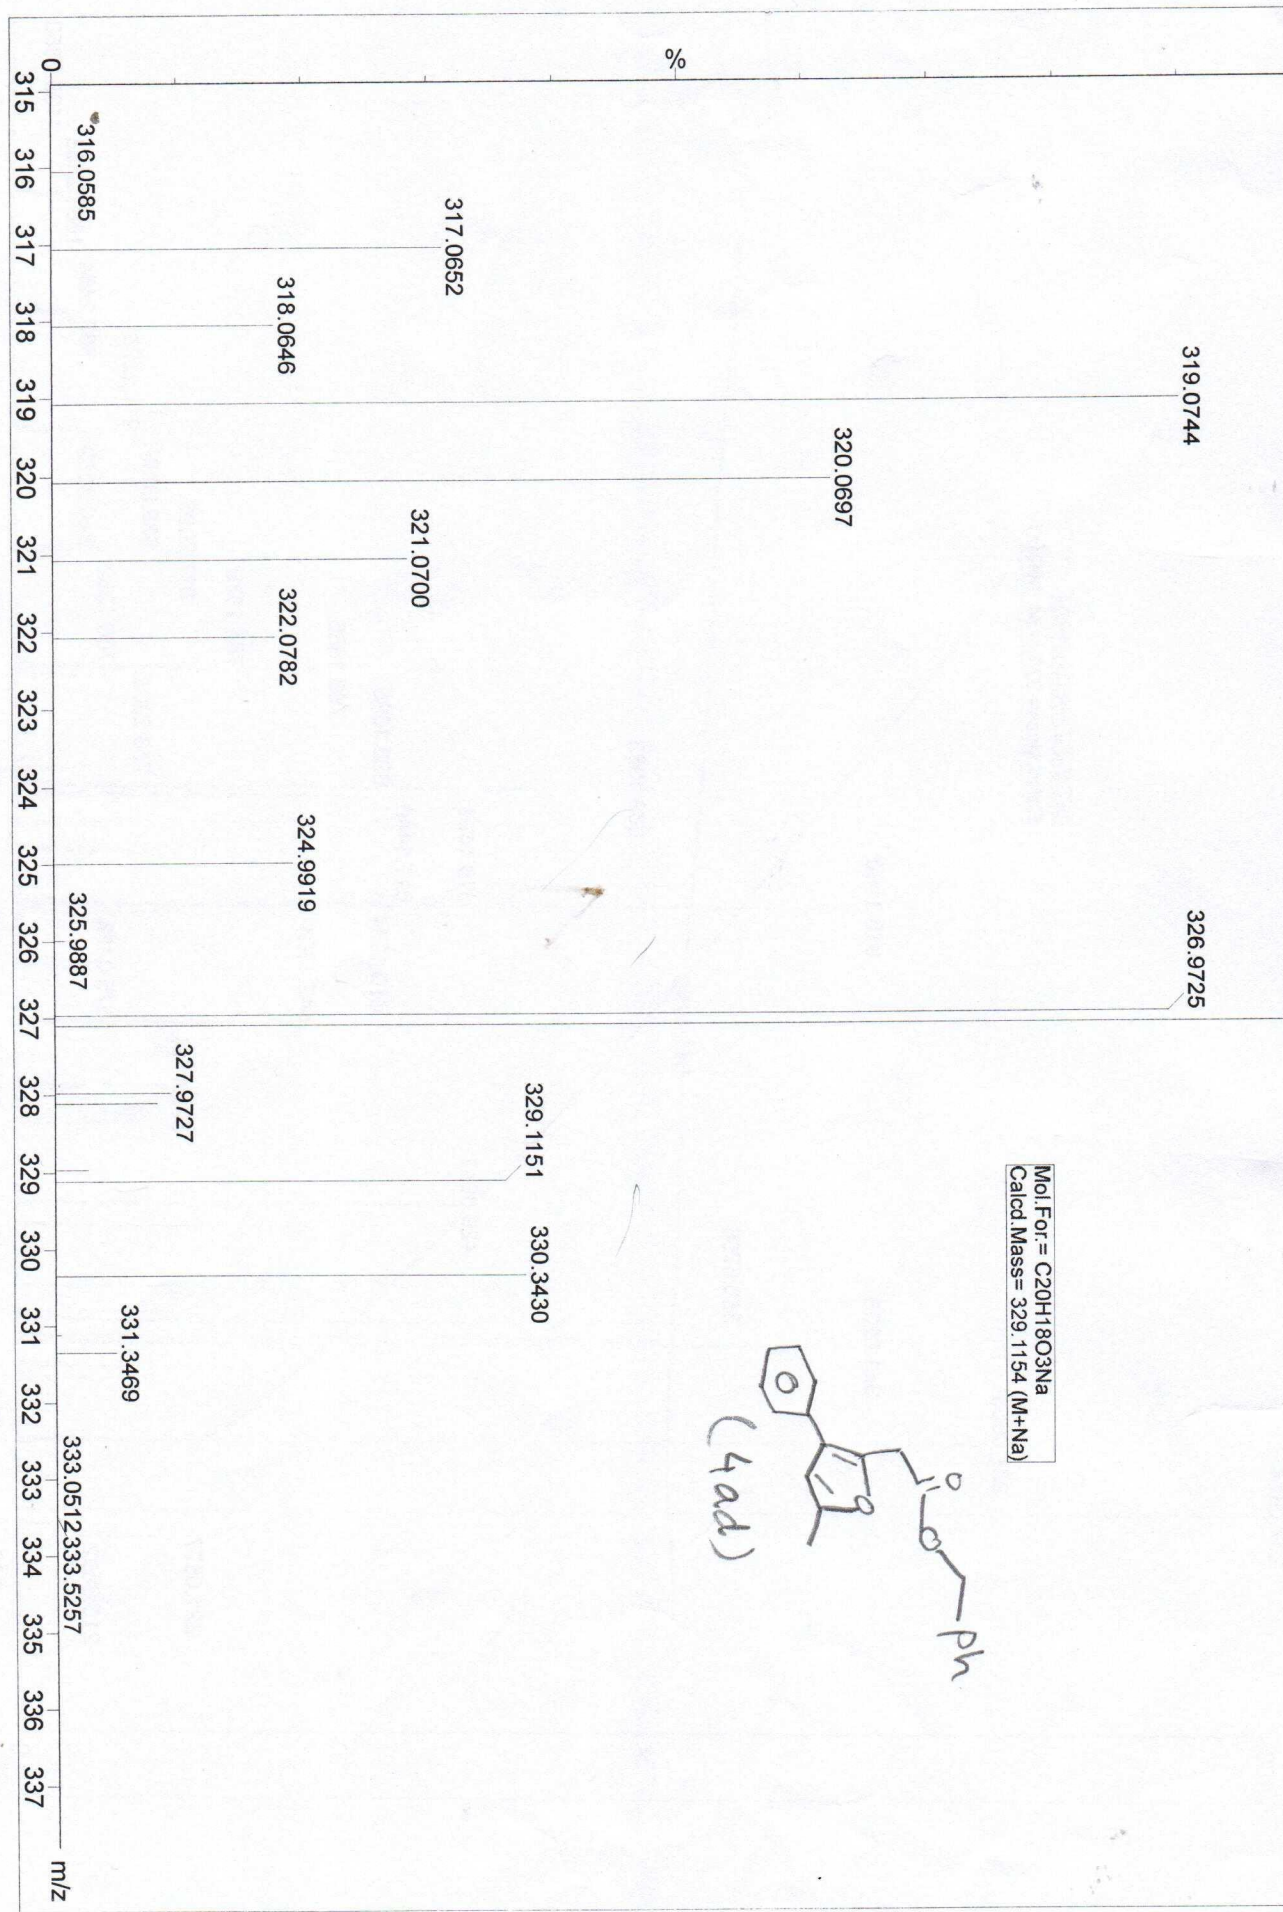

MS-04-065

19012021\_10 80 (0.762) AM2 (Ar,22000,0,556.28,0,00,LS 3); Cm (80-400:435)

II Sc Organic Chemistry

427.0903

19-Jan-2021  
1: TOF MS ES+  
3.78e5

Mol. For. = C<sub>23</sub>H<sub>18</sub>O<sub>3</sub>Na  
Calcd. Mass = 365.1154 (M+Na)

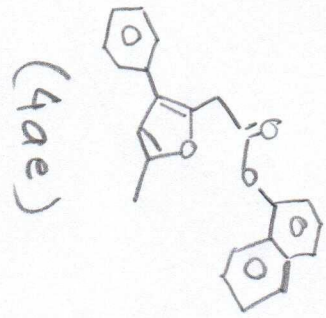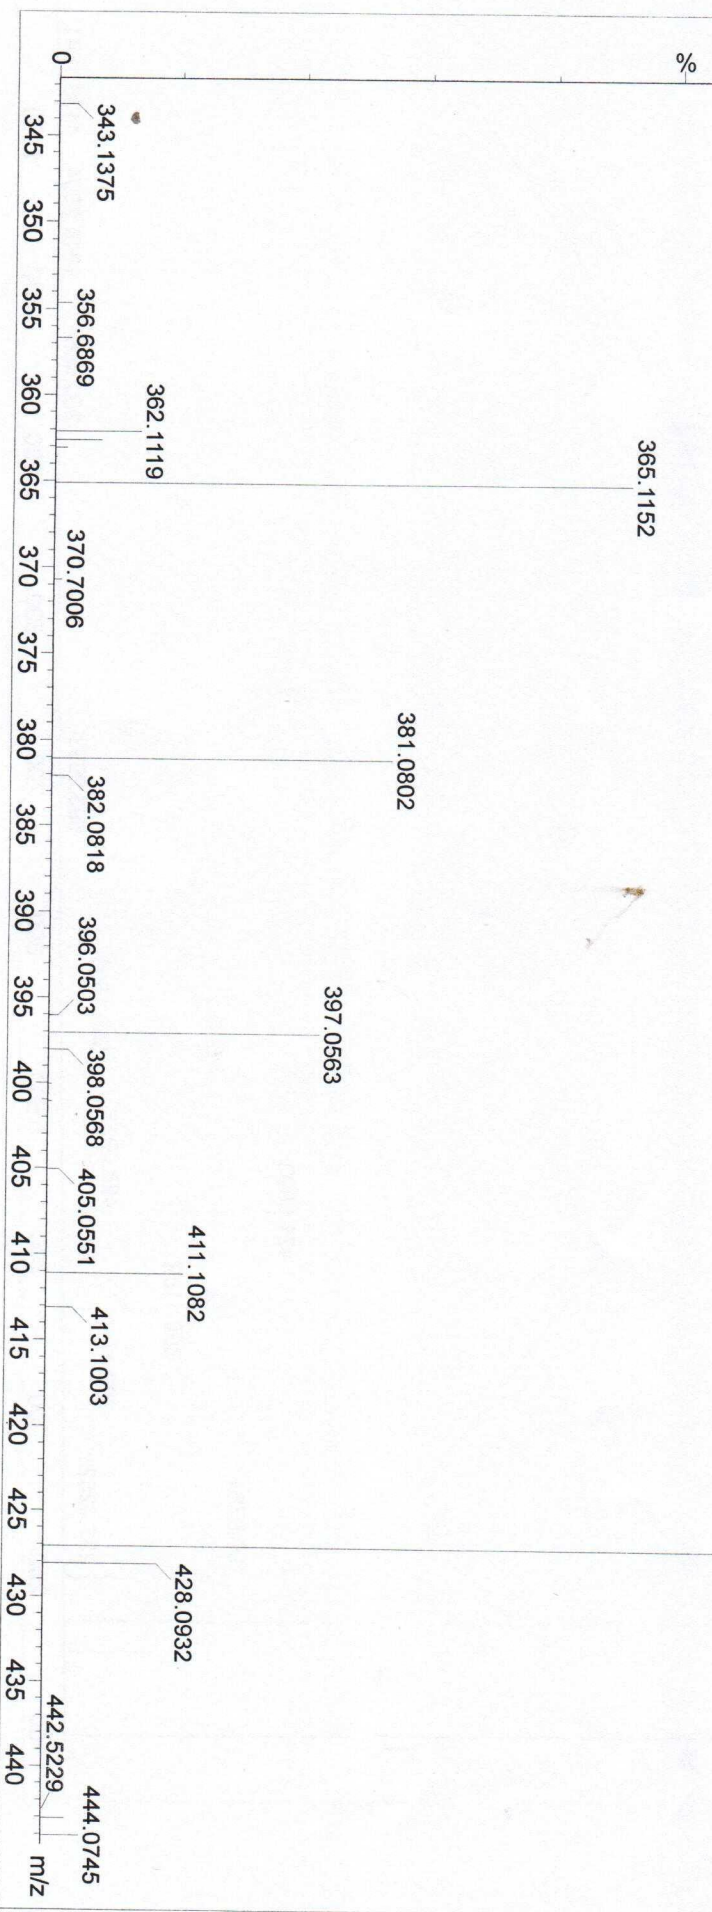

MS-04-118 P

IISc Organic Chemistry

25012021\_31 73 (0.682) AM2 (Ar:22000,0,556.29,0,00,LS 3); Cm (73-(1:39+146:436))

255.0421

100

25-Jan-2021  
1: TOF MS ES+  
7.39e5

Mol. For. = C<sub>13</sub>H<sub>12</sub>O<sub>3</sub>K  
Calcd. Mass = 255.0424 (M+K)

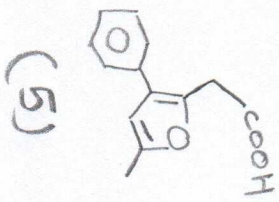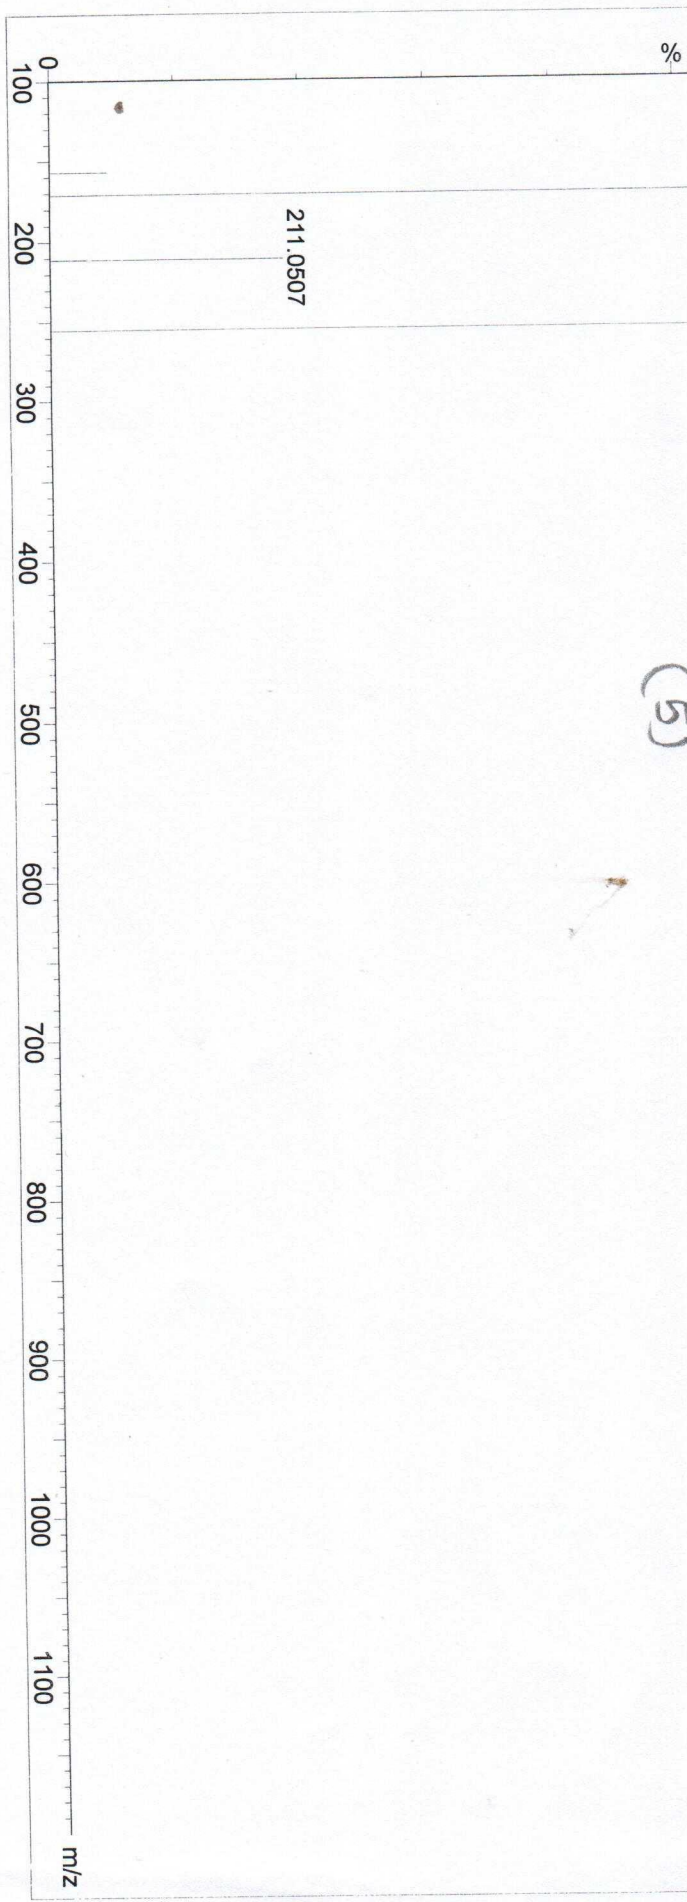

MS-04-119P

27012021\_35 91 (0.857) AM2 (Ar,22000.0,556.28,0.00,LS 3); Cm (91-(1:34+366:436))

IISc Organic Chemistry

27-Jan-2021  
1: TOF MS ES+  
1.89e6

Mol. For: = C<sub>13</sub>H<sub>14</sub>O<sub>2</sub>H  
Calcd. Mass = 203.1072(M+H)

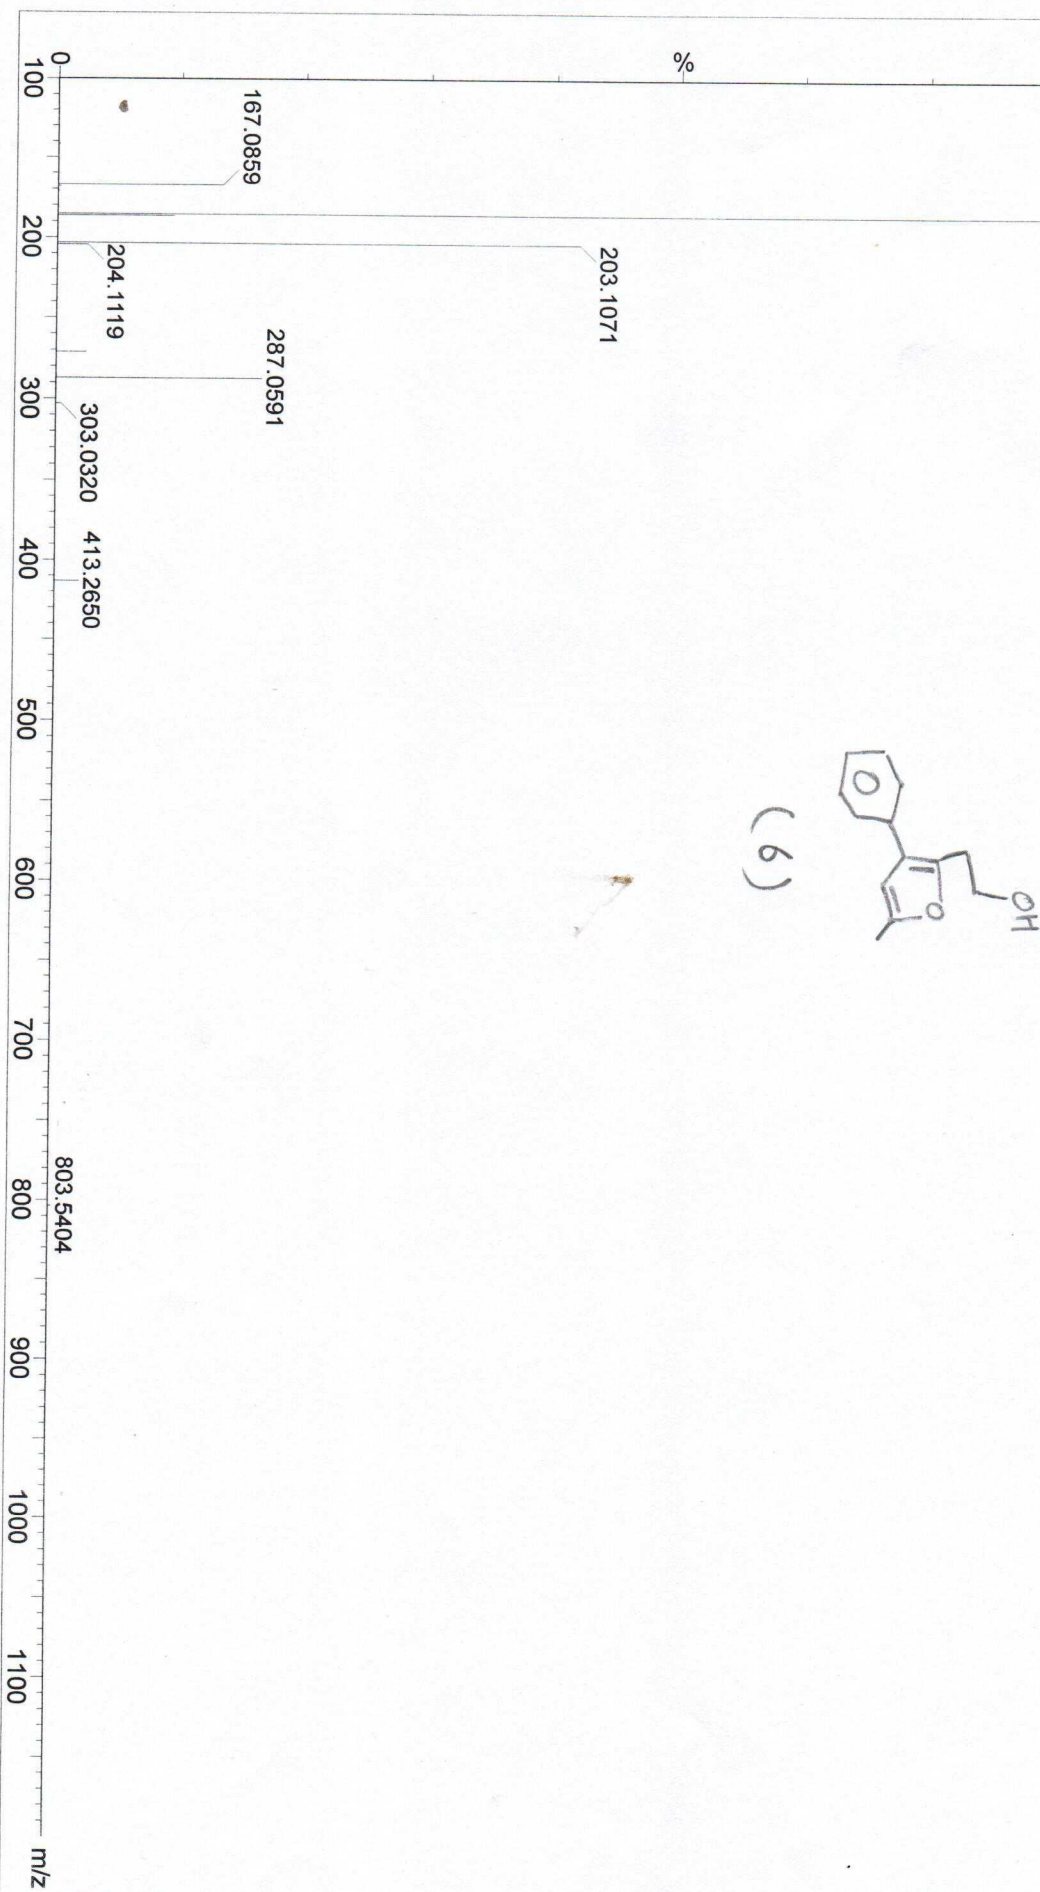

Supplement: d1ob01293b2.pdf [file d1ob01293b2.pdf]
